# Supplementary material
Source: PubMed Central journal article supplement (PMC6299223)
Supplement: mbo006184232sf1.pdf [file mbo006184232sf1.pdf]

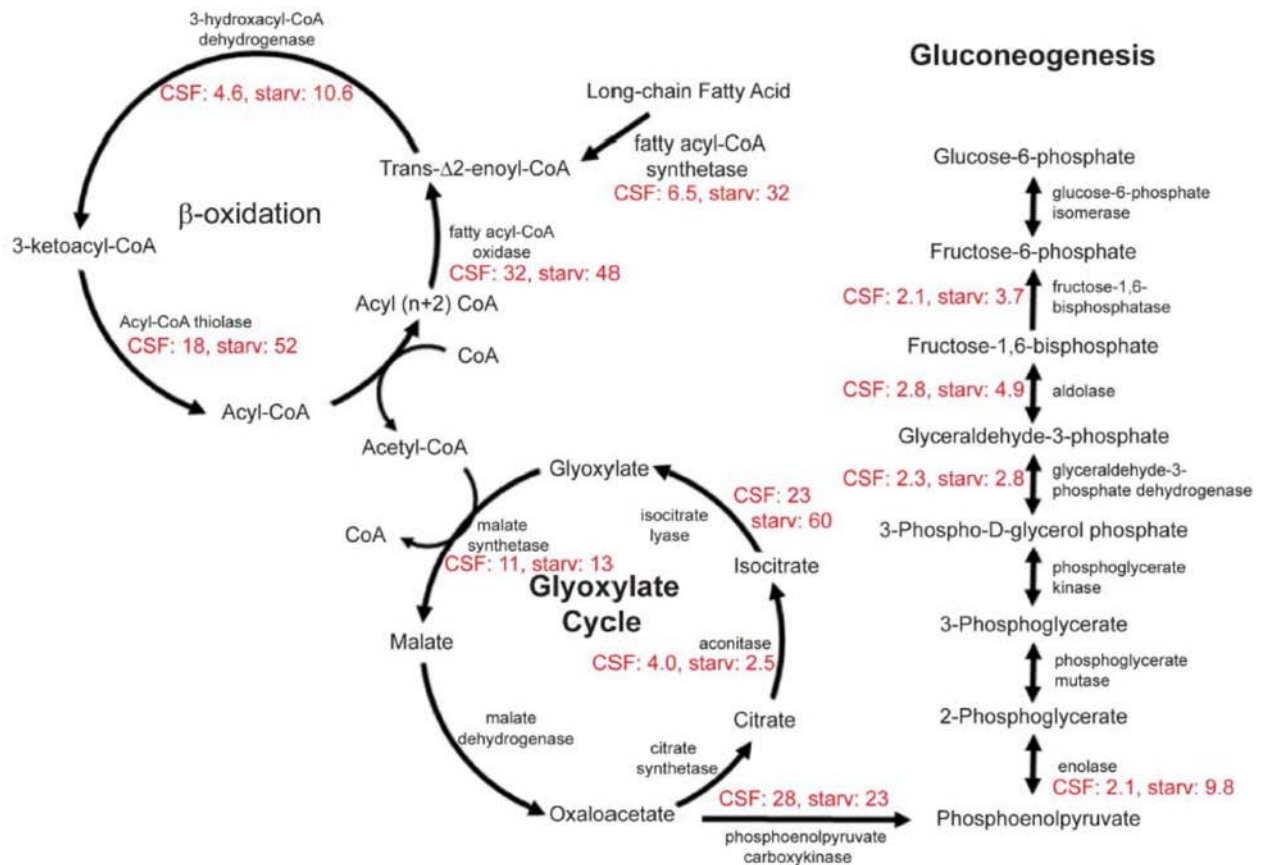

**Fig S1. Metabolic reprogramming of carbohydrate metabolism in *C. neoformans* in response to incubation in fungal infected human CSF or starvation.** Pathway schemes demonstrate differential expression ratios of *C. neoformans* after incubation in human fungal infected CSF (CSF) or in starvation conditions (starv) relative to mid log cells grown in YPD of genes expressing enzymes active in b-oxidation, glyoxylate cycle or gluconeogenesis. Adapted from Derengowski et al. (ref: 13)
