# Supplementary material
Source: PubMed Central journal article supplement (PMC6299223)
Supplement: mbo006184232sf2.pdf [file mbo006184232sf2.pdf]

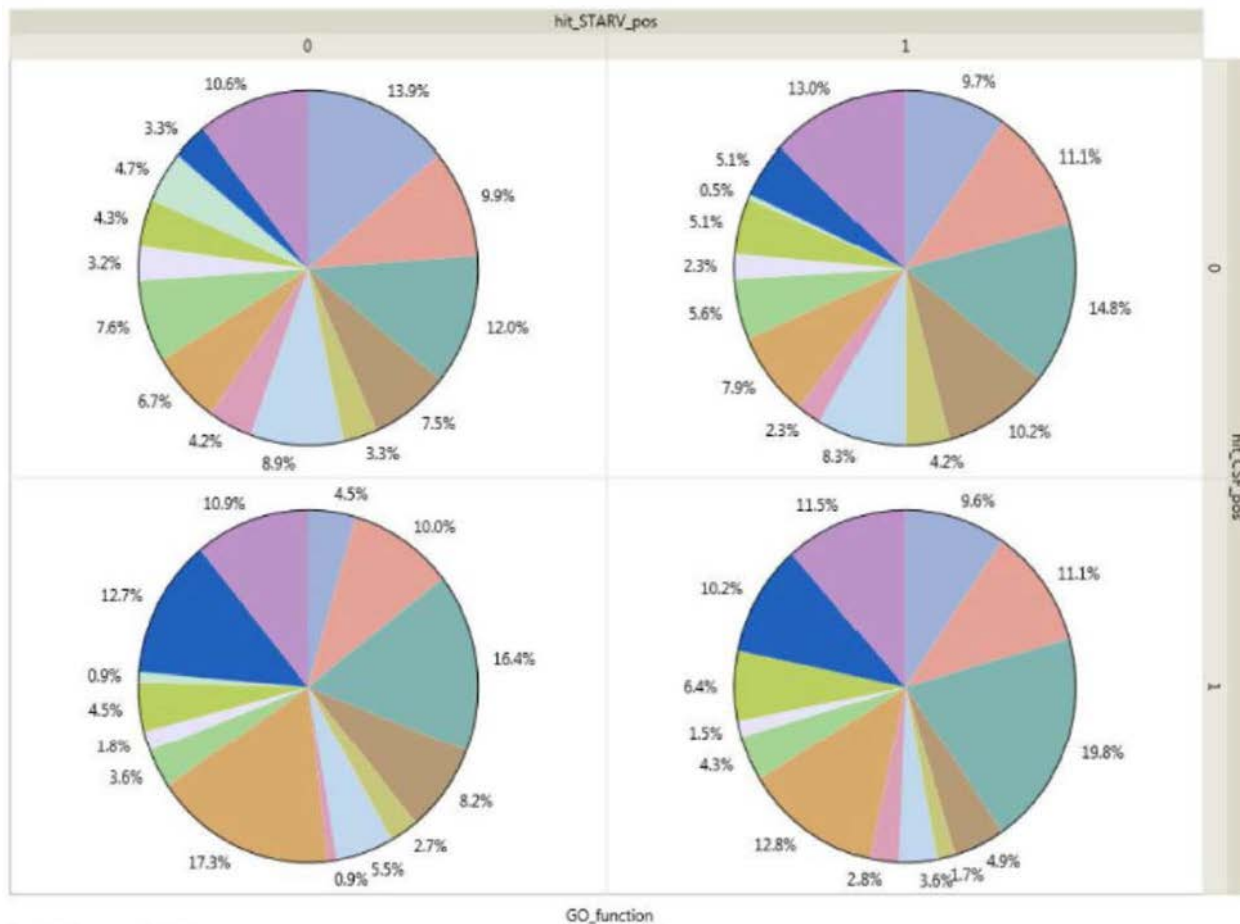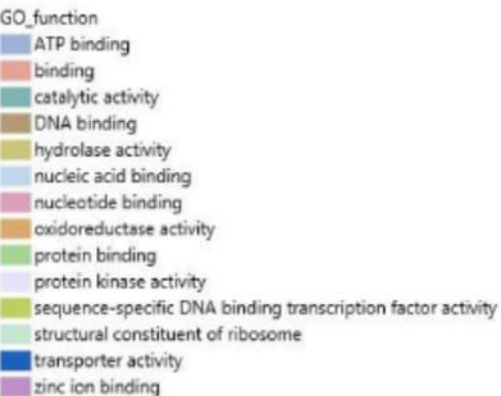

**Fig S2. Expression profiling demonstrates transcriptional expansion of genes related to transporter activity (GO function).** Transcriptional profiling of *C. neoformans* cells as in Fig 1A displayed by most common GO function terms. Percent of annotated GO terms relative to total count of gene annotations (left upper panel), starvation (right upper panel), CSF alone (right lower panel) or both CSF and starvation (right lower panel).
