# Supplementary material
Source: PubMed Central journal article supplement (PMC6299223)
Supplement: mbo006184232sf3.pdf [file mbo006184232sf3.pdf]

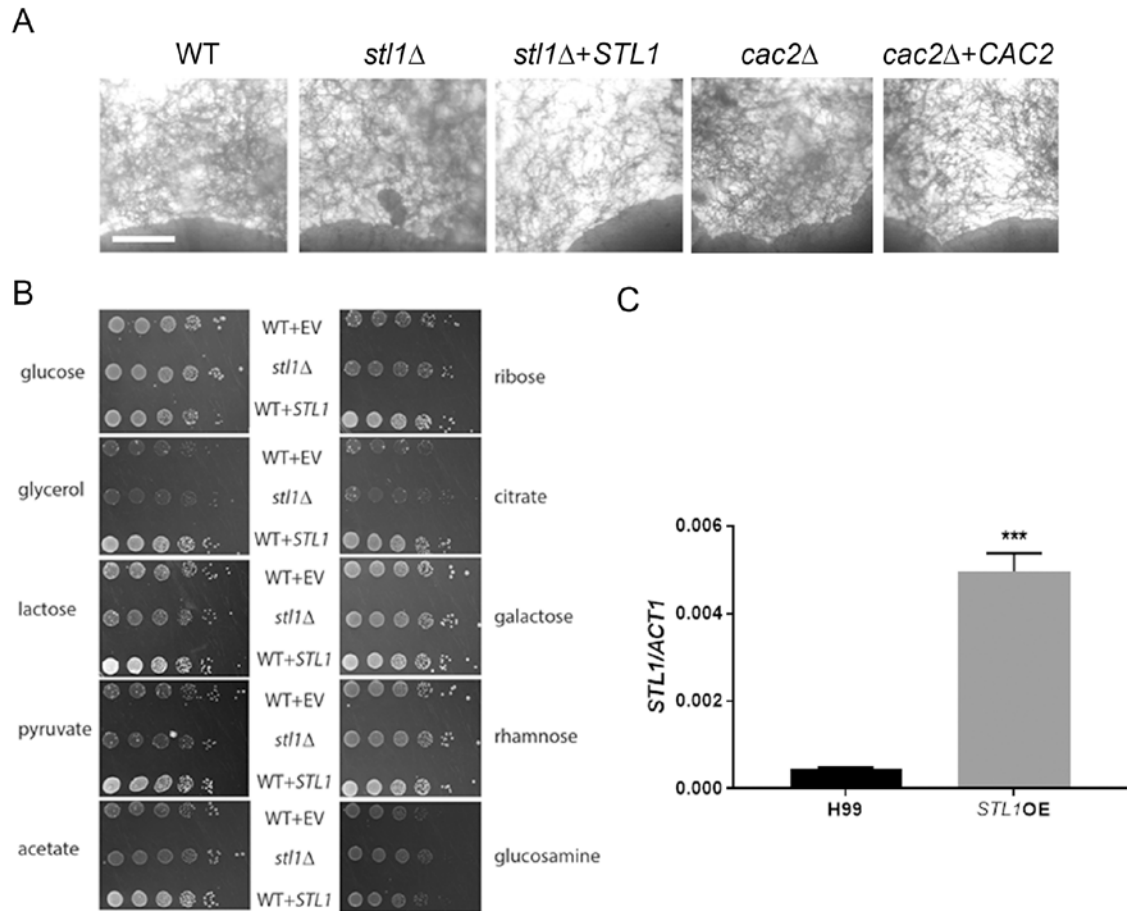

**Fig S3. Mating and spotting assay.** (A) Indicated MAT $\alpha$  strains were co-incubated with a MAT $\alpha$  mating partner (strain KN99) on nitrogen limiting mating media (V8 agar) for 3 weeks at room temperature. The edges of the mating mixtures were photographed (40x). Bar=500 $\mu$ m. (B) qRT-PCR of *STL1* of indicated strains grown to mid-log in ASN media containing 0.03 % acetate (without glucose). N = 3 independent experiments, Student's t-test \*\*\*;  $p < 0.001$ . (C) Indicated strains were diluted to an  $A_{600}$  of 1.0, and 1:5 serial dilutions (5 $\mu$ l) were plated on ASN media containing the indicated substrates (0.03%) and incubated at 30°C for 5 to 10 days.
