# Supplementary material
Source: PubMed Central journal article supplement (PMC6299223)
Supplement: mbo006184232sf4.pdf [file mbo006184232sf4.pdf]

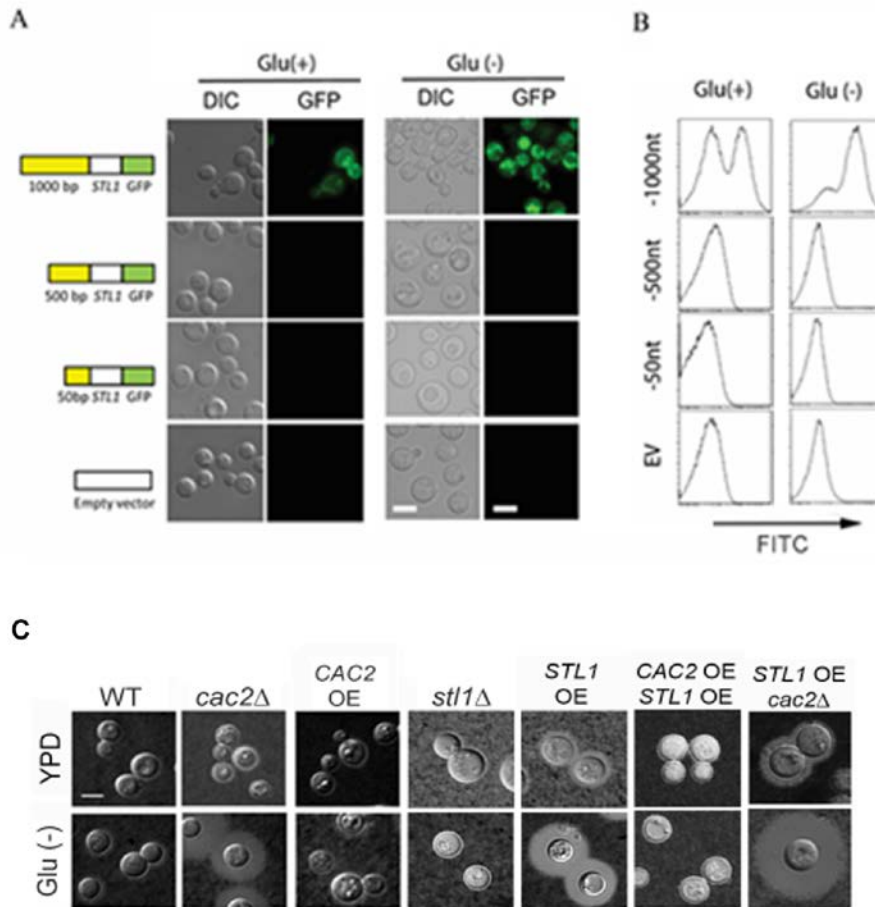

**Fig S4. Effects of serial deletion of the *STL1* 5'-promoter (-1000 from the transcript start site) on basal transcriptional activity in *C. neoformans*.** A plasmid containing *STL1* ORF with indicated regions of the *STL1* 5'-promoter GFP fusion gene were transformed into WT strain of *C. neoformans* and grown to mid-log in YPD (Glu +) and ASN salts without glucose (Glu -) media and the population subjected to microscopy (DIC, GFP fluorescence) (A) or flow cytometry (FITC) (B). Empty vector used as a control. Bar=5μm. Capsule thickness across mutant strains in *C. neoformans*. Indicated strains were incubated on YPD or ASN without glucose (Glu -) agar for 3 days at 30°C and examined by India ink microscopy. Bar=5 μm (C).
