# Supplementary material
Source: PubMed Central journal article supplement (PMC6299223)
Supplement: mbo006184232sf5.pdf [file mbo006184232sf5.pdf]

A

## cNLS Mapper Result

| Predicted NLSs in query sequence                             |     |
|--------------------------------------------------------------|-----|
| MSDQLYAIADFCLIPMGLPVPSVGPQIAECQVLEKSGLEYKLGHYGTNV            | 50  |
| EGPHDQVMKAIIGD <b>CHKAVHANGTPRIATDIRIGTRTDK</b> SIASGGNDGKVK | 100 |
| RVEEILAKESSKA                                                | 114 |

| Predicted monopartite NLS |          |       |
|---------------------------|----------|-------|
| Pos.                      | Sequence | Score |
|                           |          |       |

| Predicted bipartite NLS |                                        |       |
|-------------------------|----------------------------------------|-------|
| Pos.                    | Sequence                               | Score |
| 63                      | DCHKAVHANGTPRIATDIRIGTRTDK <b>SI</b> A | 2.4   |

B

## cNLS Mapper Result

| Predicted NLSs in query sequence                           |     |
|------------------------------------------------------------|-----|
| MRPKVLEIAIHETQAVVYSCDFQPLPLPQLKRLAASTTSEEDKDRIEK           | 50  |
| GSSSAATAAGGRQYRLATAGGDSKVRIMVMVYVNPISIPPSTVAALTGHEY        | 100 |
| TPHPPRVEYLATLSKHTAPVNVVRFSPSGQILASAGDDGNVILWVSDRP          | 150 |
| TAVFGETSDDLPKHEMRLQKMLQVTTKHVYDLSHSPDGEVLIAGSDTNT          | 200 |
| ATIKAATGECVAFALREHMHVQVSNDFLNEYIATQSSDRVHVNTFTT            | 250 |
| RNGIPDVHPVSRSTRMEIRHSRTPSISSASRPSMVRGGSTTSEAGSVITT         | 300 |
| ASDFPEAALPPHAPALAGVSASATPATPSASVSTPQAAPAPINPPATSN          | 350 |
| RPCSRSSFSGSQTAASPALSAAAFSHLARSARSPSIPPLPAIRAPPAL           | 400 |
| TINQRLYGEEGATRFRRLLTFSPDGLLLTPAQIEDQVFKGSPLLTAKN           | 450 |
| VSQTSDFSSSSVPRPKNVEGKPTAVIYSRANLSRSPIAHLPGHKTSV            | 500 |
| AIRFSPVFDLRHNGQLSAEPKHVNFKNDIQPVHVSLSLHMPPPPSGSRE          | 550 |
| KEKEKEGDKVLGSVFALPYRLLYAVACQDSVLLYDTQQAGPIAIFKGLHY         | 600 |
| AGFTDVAHSPDQCLFLSSADGYCSIVIFDLGELGTVHPTQQMHRQLQAI          | 650 |
| AQSHNNGISTPLPPSLIHRDSIHS SHS QSGASATGHSPAVSHVARQSPAP       | 700 |
| GVARSDREGSTASSVVGASGVSASLLSVPNAGGAKAPPSSASSVTVTD           | 750 |
| QVLPTPTPSDTEGPSAAGVDLGIAMSQ <b>EGDAKKREGAGETTQAEAPKKRR</b> | 800 |
| <b>RVAL</b> THLGSEQ                                        | 811 |

| Predicted monopartite NLS |             |       |
|---------------------------|-------------|-------|
| Pos.                      | Sequence    | Score |
| 795                       | APKKKRRVA   | 9.5   |
| 794                       | EAPKKKRRVAL | 6     |
| 796                       | PKKKRRVALT  | 8     |

| Predicted bipartite NLS |                           |       |
|-------------------------|---------------------------|-------|
| Pos.                    | Sequence                  | Score |
| 778                     | EGDAKKREGAGETTQAEAPKKKRRV | 11.6  |

**Fig S5. Prediction of putative nuclear localization signals.** Ecm15 (A) and Cac2 (B) putative nuclear localization signals were determined by cNLS Mapper.
