# Supplementary material
Source: PubMed Central journal article supplement (PMC6299223)
Supplement: mbo006184232st1.pdf [file mbo006184232st1.pdf]

Table S1. Genome-wide expression level changes after transition from YPD to CSF

| GeneID     | NAME                               | Log2(CSF/YPD) |
|------------|------------------------------------|---------------|
| CNAG_03058 | Hmp1 protein                       | 9.51766       |
| CNAG_04585 | conserved hypothetical protein     | 8.10510       |
| CNAG_02489 | mannitol-1-phosphate dehydrogenase | 7.93261       |
| CNAG_01047 | conserved hypothetical protein     | 7.83050       |
| CNAG_04981 | catalase A                         | 7.63494       |
| CNAG_00588 | conserved hypothetical protein     | 7.54154       |
| CNAG_00679 | conserved hypothetical protein     | 7.28860       |
| CNAG_07869 | conserved hypothetical protein     | 7.02847       |
| CNAG_04374 | conserved hypothetical protein     | 7.00627       |
| CNAG_04105 | hypothetical protein               | 6.93936       |
| CNAG_03143 | conserved hypothetical protein     | 6.67974       |
| CNAG_06220 | allergen                           | 6.67245       |
| CNAG_03566 | conserved hypothetical protein     | 6.51354       |
| CNAG_06453 | conserved hypothetical protein     | 6.44270       |
| CNAG_02899 | predicted protein                  | 6.34736       |
| CNAG_06267 | Rds1 protein                       | 6.34645       |
| CNAG_00452 | isovaleryl-CoA dehydrogenase 2     | 6.26203       |
| CNAG_04394 | conserved hypothetical protein     | 6.24809       |
| CNAG_01936 | sugar transporter                  | 6.18328       |
| CNAG_02118 | conserved hypothetical protein     | 6.02872       |
| CNAG_06312 | hypothetical protein               | 6.00235       |
| CNAG_00896 | transcription factor               | 5.99403       |
| CNAG_07939 | predicted protein                  | 5.81395       |
| CNAG_05683 | conserved hypothetical protein     | 5.80474       |
| CNAG_07367 | amino acid transporter             | 5.65916       |
| CNAG_05939 | conserved hypothetical protein     | 5.55674       |
| CNAG_03525 | trehalase                          | 5.50890       |
| CNAG_02701 | conserved hypothetical protein     | 5.46804       |
| CNAG_00979 | copper uptake transporter          | 5.46484       |
| CNAG_00052 | conserved hypothetical protein     | 5.39690       |
| CNAG_03134 | 3-hydroxybutyryl-CoA dehydrogenase | 5.32505       |
| CNAG_05229 | stomatin family protein            | 5.20316       |
| CNAG_06551 | carnitine O-acetyltransferase      | 5.06437       |
| CNAG_07765 | bli-3 protein                      | 5.01536       |
| CNAG_06431 | acyl-CoA oxidase                   | 4.95988       |
| CNAG_07862 | fumarate reductase                 | 4.95082       |
| CNAG_05662 | sugar transporter                  | 4.93001       |
| CNAG_02765 | 3-hydroxyisobutyrate dehydrogenase | 4.90882       |
| CNAG_06926 | conserved hypothetical protein     | 4.90567       |
| CNAG_01446 | hypothetical protein               | 4.90277       |
| CNAG_02045 | acetoacyl-CoA synthetase           | 4.88383       |
| CNAG_03873 | conserved hypothetical protein     | 4.83683       |

|            |                                           |         |
|------------|-------------------------------------------|---------|
| CNAG_00315 | HHE domain-containing protein             | 4.82318 |
| CNAG_06577 | conserved hypothetical protein            | 4.81696 |
| CNAG_04217 | phosphoenolpyruvate carboxykinase         | 4.81474 |
| CNAG_04837 | conserved hypothetical protein            | 4.79969 |
| CNAG_01751 | conserved hypothetical protein            | 4.77758 |
| CNAG_06623 | myo-inositol oxygenase                    | 4.77333 |
| CNAG_06396 | hypothetical protein                      | 4.75228 |
| CNAG_06493 | conserved hypothetical protein            | 4.73632 |
| CNAG_01690 | MFS transporter                           | 4.71632 |
| CNAG_04392 | sterol-binding protein                    | 4.58626 |
| CNAG_01680 | methylcrotonoyl-Coenzyme A carboxylase 1  | 4.54271 |
| CNAG_00371 | enoyl-CoA hydratase                       | 4.52493 |
| CNAG_05303 | isocitrate lyase                          | 4.51444 |
| CNAG_06186 | DUF895 domain membrane protein            | 4.49693 |
| CNAG_05678 | membrane protein                          | 4.45362 |
| CNAG_02978 | conserved hypothetical protein            | 4.44655 |
| CNAG_01865 | conserved hypothetical protein            | 4.44069 |
| CNAG_01969 | zinc metalloprotease                      | 4.39105 |
| CNAG_00597 | amino acid transporter                    | 4.38791 |
| CNAG_04163 | conserved hypothetical protein            | 4.34740 |
| CNAG_01052 | conserved hypothetical protein            | 4.32642 |
| CNAG_01070 | class II aldolase/adducin family protein  | 4.31829 |
| CNAG_00091 | conserved hypothetical protein            | 4.30822 |
| CNAG_06576 | allergen                                  | 4.28824 |
| CNAG_01116 | beta-ketoacyl reductase                   | 4.26609 |
| CNAG_04869 | carboxylesterases                         | 4.24952 |
| CNAG_06574 | antiphagocytic protein 1                  | 4.24377 |
| CNAG_03782 | conserved hypothetical protein            | 4.20514 |
| CNAG_01585 | conserved hypothetical protein            | 4.19509 |
| CNAG_03666 | acyl-CoA dehydrogenase                    | 4.14638 |
| CNAG_00162 | alternative oxidase                       | 4.10845 |
| CNAG_01753 | conserved hypothetical protein            | 4.10312 |
| CNAG_06668 | mitochondrial protein                     | 4.09096 |
| CNAG_05736 | predicted protein                         | 4.08723 |
| CNAG_01750 | chaperone                                 | 4.07954 |
| CNAG_03268 | hypothetical protein                      | 4.07301 |
| CNAG_06628 | aldehyde dehydrogenase                    | 4.06917 |
| CNAG_03772 | glucose transporter                       | 4.04091 |
| CNAG_05167 | conserved hypothetical protein            | 4.03763 |
| CNAG_03572 | opsin 1                                   | 3.99428 |
| CNAG_00488 | conserved hypothetical protein            | 3.99259 |
| CNAG_01743 | conserved hypothetical protein            | 3.98182 |
| CNAG_00827 | ribose 5-phosphate isomerase              | 3.97670 |
| CNAG_00984 | glucose and ribitol dehydrogenase protein | 3.96883 |
| CNAG_05119 | GabA permease                             | 3.96631 |
| CNAG_05685 | neutral amino acid transporter            | 3.95291 |

|            |                                               |         |
|------------|-----------------------------------------------|---------|
| CNAG_05115 | sarcosine oxidase                             | 3.86872 |
| CNAG_04459 | hypothetical protein                          | 3.86150 |
| CNAG_00598 | nicotinamide mononucleotide permease          | 3.84240 |
| CNAG_05785 | conserved hypothetical protein                | 3.83113 |
| CNAG_05867 | L-fucose transporter                          | 3.82392 |
| CNAG_04849 | vacuolar protein                              | 3.80438 |
| CNAG_05021 | conserved hypothetical protein                | 3.78952 |
| CNAG_07831 | predicted protein                             | 3.77616 |
| CNAG_03115 | conserved hypothetical protein                | 3.77407 |
| CNAG_05299 | oxidoreductase                                | 3.76540 |
| CNAG_02526 | conserved hypothetical protein                | 3.73812 |
| CNAG_03010 | enoyl-CoA hydratase/isomerase family protein  | 3.72345 |
| CNAG_00751 | conserved hypothetical protein                | 3.69774 |
| CNAG_06527 | trehalose transporter                         | 3.67467 |
| CNAG_01671 | acetyl/propionyl CoA carboxylase              | 3.66723 |
| CNAG_02440 | cation-transporting ATPase                    | 3.66348 |
| CNAG_00995 | conserved hypothetical protein                | 3.62739 |
| CNAG_05300 | mitochondrial carrier protein                 | 3.62264 |
| CNAG_02129 | conserved hypothetical protein                | 3.60768 |
| CNAG_06292 | sugar transporter                             | 3.57544 |
| CNAG_02691 | conserved hypothetical protein                | 3.56726 |
| CNAG_03243 | 2-nitropropane dioxygenase                    | 3.55650 |
| CNAG_02591 | hypothetical protein                          | 3.55034 |
| CNAG_05435 | conserved hypothetical protein                | 3.53368 |
| CNAG_05721 | peroxisomal hydratase-dehydrogenase-epimerase | 3.53199 |
| CNAG_05653 | malate synthase                               | 3.51862 |
| CNAG_06515 | UPF0271 protein                               | 3.51243 |
| CNAG_03894 | conserved hypothetical protein                | 3.50857 |
| CNAG_05324 | sugar transporter                             | 3.50512 |
| CNAG_00484 | puruvate dehydrogenase complex                | 3.48988 |
| CNAG_01925 | conserved hypothetical protein                | 3.48153 |
| CNAG_05381 | myo-inositol transporter 2                    | 3.47563 |
| CNAG_06150 | heat-shock protein 90                         | 3.46494 |
| CNAG_03910 | D-xylose-proton symporter                     | 3.46222 |
| CNAG_06932 | sugar transporter                             | 3.45946 |
| CNAG_02147 | cytochrome-c peroxidase                       | 3.45942 |
| CNAG_02448 | predicted protein                             | 3.45106 |
| CNAG_00028 | high-affinity nicotinic acid transporter      | 3.43507 |
| CNAG_00791 | conserved hypothetical protein                | 3.41525 |
| CNAG_06448 | cystathionine gamma-lyase                     | 3.39592 |
| CNAG_06827 | conserved hypothetical protein                | 3.38883 |
| CNAG_02254 | quinatate permease                            | 3.38147 |
| CNAG_01256 | conserved hypothetical protein                | 3.37774 |
| CNAG_03688 | conserved hypothetical protein                | 3.35530 |
| CNAG_01138 | cytochrome c peroxidase                       | 3.35428 |
| CNAG_02288 | succinate:fumarate antiporter                 | 3.31923 |

|            |                                       |         |
|------------|---------------------------------------|---------|
| CNAG_05658 | L-arabinitol 4-dehydrogenase          | 3.30327 |
| CNAG_01341 | mannose-6-phosphate isomerase         | 3.28992 |
| CNAG_02553 | short-chain dehydrogenase             | 3.28465 |
| CNAG_07944 | allophanate hydrolase subunit 2       | 3.27690 |
| CNAG_05913 | alpha-glucosidase                     | 3.27041 |
| CNAG_02044 | conserved hypothetical protein        | 3.26822 |
| CNAG_06935 | isochorismatase hydrolase             | 3.23720 |
| CNAG_05266 | membrane protein                      | 3.22754 |
| CNAG_07347 | heat shock protein                    | 3.22479 |
| CNAG_00490 | acetyl-CoA C-acyltransferase          | 3.18717 |
| CNAG_01993 | conserved hypothetical protein        | 3.18666 |
| CNAG_06296 | conserved hypothetical protein        | 3.17334 |
| CNAG_05644 | 2-nitropropane dioxygenase            | 3.16785 |
| CNAG_01735 | conserved hypothetical protein        | 3.16380 |
| CNAG_05313 | conserved hypothetical protein        | 3.14527 |
| CNAG_03518 | PadA2                                 | 3.14239 |
| CNAG_02674 | dJ347H13.4                            | 3.13271 |
| CNAG_03050 | conserved hypothetical protein        | 3.12736 |
| CNAG_02439 | conserved hypothetical protein        | 3.12716 |
| CNAG_03667 | conserved hypothetical protein        | 3.11143 |
| CNAG_02550 | conserved hypothetical protein        | 3.10800 |
| CNAG_06109 | conserved hypothetical protein        | 3.09352 |
| CNAG_06800 | conserved hypothetical protein        | 3.09273 |
| CNAG_02562 | acyl-Coenzyme A dehydrogenase         | 3.08694 |
| CNAG_00738 | conserved hypothetical protein        | 3.08382 |
| CNAG_04704 | carboxylic acid transport protein     | 3.08373 |
| CNAG_02603 | early growth response protein 1       | 3.06941 |
| CNAG_05676 | tyrosine aminotransferase             | 3.06036 |
| CNAG_07755 | conserved hypothetical protein        | 3.05801 |
| CNAG_01983 | cAMP-independent regulatory protein   | 3.04685 |
| CNAG_05938 | conserved hypothetical protein        | 3.04278 |
| CNAG_07486 | conserved hypothetical protein        | 3.01743 |
| CNAG_00651 | ATP-binding cassette transporter      | 3.01059 |
| CNAG_02682 | MSH1 protein                          | 3.00572 |
| CNAG_00529 | sulfite transporter                   | 2.99860 |
| CNAG_00522 | C2 domain-containing protein          | 2.96581 |
| CNAG_06871 | conserved hypothetical protein        | 2.96378 |
| CNAG_05932 | peptidyl-prolyl cis-trans isomerase D | 2.94884 |
| CNAG_01847 | conserved hypothetical protein        | 2.93724 |
| CNAG_01742 | water channel                         | 2.89122 |
| CNAG_07528 | conserved hypothetical protein        | 2.86875 |
| CNAG_00397 | pyruvate dehydrogenase                | 2.86642 |
| CNAG_03067 | pyruvate carboxyltransferase          | 2.83473 |
| CNAG_03644 | CAS3p                                 | 2.83339 |
| CNAG_04274 | acyl-CoA thioesterase                 | 2.82989 |
| CNAG_04085 | oxidoreductase                        | 2.82046 |

|            |                                                            |         |
|------------|------------------------------------------------------------|---------|
| CNAG_04186 | conserved hypothetical protein                             | 2.81492 |
| CNAG_02764 | adrenoleukodystrophy protein                               | 2.80911 |
| CNAG_02295 | phosphotransferase enzyme family domain-containing protein | 2.80534 |
| CNAG_05325 | conserved hypothetical protein                             | 2.80042 |
| CNAG_04345 | specific RNA polymerase II transcription factor            | 2.79871 |
| CNAG_04836 | nuclear protein                                            | 2.78977 |
| CNAG_06201 | conserved hypothetical protein                             | 2.78410 |
| CNAG_00161 | auxin-induced protein                                      | 2.78215 |
| CNAG_00251 | conserved hypothetical protein                             | 2.78108 |
| CNAG_01074 | neutral amino acid transporter                             | 2.78096 |
| CNAG_01231 | arginase                                                   | 2.77915 |
| CNAG_00054 | DUF1264 domain-containing protein                          | 2.75908 |
| CNAG_06241 | acidic laccase                                             | 2.75430 |
| CNAG_04753 | lactonohydrolase                                           | 2.73314 |
| CNAG_04103 | DUF895 domain membrane protein                             | 2.73182 |
| CNAG_03495 | conserved hypothetical protein                             | 2.71794 |
| CNAG_06355 | conserved hypothetical protein                             | 2.71011 |
| CNAG_06157 | conserved hypothetical protein                             | 2.70231 |
| CNAG_01534 | predicted protein                                          | 2.69741 |
| CNAG_05657 | cytoplasmic protein                                        | 2.69455 |
| CNAG_03128 | lincomycin-condensing protein lmbA                         | 2.69428 |
| CNAG_04238 | 2,4-dienoyl-CoA reductase                                  | 2.69175 |
| CNAG_07458 | hypothetical protein                                       | 2.68734 |
| CNAG_00826 | glycerone kinase                                           | 2.68536 |
| CNAG_03019 | long-chain-fatty-acid-CoA ligase                           | 2.68531 |
| CNAG_06294 | DUF1338 domain-containing protein                          | 2.68056 |
| CNAG_05914 | MFS maltose permease MalP                                  | 2.67443 |
| CNAG_06879 | conserved hypothetical protein                             | 2.66852 |
| CNAG_03011 | glycerate-and formate-dehydrogenase                        | 2.66302 |
| CNAG_06302 | PEP2                                                       | 2.66167 |
| CNAG_00029 | D-3-phosphoglycerate dehydrogenase                         | 2.66112 |
| CNAG_04980 | RNA cap binding protein                                    | 2.65947 |
| CNAG_01348 | conserved hypothetical protein                             | 2.65937 |
| CNAG_05304 | predicted protein                                          | 2.65778 |
| CNAG_02934 | conserved hypothetical protein                             | 2.64024 |
| CNAG_04415 | oxidoreductase                                             | 2.63722 |
| CNAG_06931 | beta-glucosidase                                           | 2.63003 |
| CNAG_07043 | conserved hypothetical protein                             | 2.62621 |
| CNAG_03695 | Cas41p                                                     | 2.62455 |
| CNAG_02225 | cellulase                                                  | 2.60320 |
| CNAG_07802 | class III aminotransferase                                 | 2.59955 |
| CNAG_04713 | CLYBL protein                                              | 2.59850 |
| CNAG_01588 | hypothetical protein                                       | 2.59602 |
| CNAG_04307 | uricase                                                    | 2.59266 |
| CNAG_04737 | DUF323 domain-containing protein                           | 2.58898 |

|            |                                                            |         |
|------------|------------------------------------------------------------|---------|
| CNAG_05169 | cytochrome b2                                              | 2.57675 |
| CNAG_04210 | sugar transporter                                          | 2.57452 |
| CNAG_02500 | calnexin                                                   | 2.55131 |
| CNAG_01758 | polygalacturonase                                          | 2.54792 |
| CNAG_00531 | ENA P-type ATPase 1                                        | 2.53724 |
| CNAG_01055 | phospholipid transporter                                   | 2.52775 |
| CNAG_06216 | conserved hypothetical protein                             | 2.52672 |
| CNAG_07641 | monosaccharide transporter                                 | 2.52526 |
| CNAG_01387 | conserved hypothetical protein                             | 2.52217 |
| CNAG_03727 | conserved hypothetical protein                             | 2.51478 |
| CNAG_01686 | ThiI/Pfpl                                                  | 2.50067 |
| CNAG_03394 | conserved hypothetical protein                             | 2.49766 |
| CNAG_04623 | conserved hypothetical protein                             | 2.49690 |
| CNAG_01835 | receptor                                                   | 2.49596 |
| CNAG_05991 | glycosyl hydrolase family 88                               | 2.49011 |
| CNAG_00503 | conserved hypothetical protein                             | 2.48246 |
| CNAG_06698 | phosphatase                                                | 2.46902 |
| CNAG_06209 | hypothetical protein                                       | 2.46772 |
| CNAG_04324 | Atg22B-1p                                                  | 2.46762 |
| CNAG_05042 | carnitine acetyltransferase                                | 2.46393 |
| CNAG_03084 | endoribonuclease L-PSP                                     | 2.45319 |
| CNAG_07403 | peroxisome biogenesis factor 1                             | 2.44984 |
| CNAG_06962 | conserved hypothetical protein                             | 2.44938 |
| CNAG_01481 | conserved hypothetical protein                             | 2.44256 |
| CNAG_03233 | conserved hypothetical protein                             | 2.44138 |
| CNAG_04625 | serine-type endopeptidase                                  | 2.44017 |
| CNAG_04417 | 2,4-dichlorophenoxyacetate alpha-ketoglutarate dioxygenase | 2.43859 |
| CNAG_02690 | pirin                                                      | 2.43153 |
| CNAG_06164 | conserved hypothetical protein                             | 2.43051 |
| CNAG_09003 | small ribosomal protein subunit 3                          | 2.43003 |
| CNAG_02226 | conserved hypothetical protein                             | 2.42720 |
| CNAG_05092 | predicted protein                                          | 2.42167 |
| CNAG_01794 | 2-hydroxyacid dehydrogenase                                | 2.42120 |
| CNAG_01567 | DUF1688 domain-containing protein                          | 2.41961 |
| CNAG_04979 | conserved hypothetical protein                             | 2.41376 |
| CNAG_04735 | extracellular elastinolytic metalloproteinase              | 2.41301 |
| CNAG_07557 | ATP-binding cassette transporter                           | 2.40760 |
| CNAG_04993 | conserved hypothetical protein                             | 2.40469 |
| CNAG_04531 | enoyl-CoA hydratase                                        | 2.40320 |
| CNAG_03060 | multiple drug resistance protein                           | 2.40033 |
| CNAG_00834 | phosphatidylserine decarboxylase                           | 2.39748 |
| CNAG_05929 | MFS maltose permease MalP                                  | 2.39085 |
| CNAG_01934 | predicted protein                                          | 2.39018 |
| CNAG_05383 | conserved hypothetical protein                             | 2.37445 |
| CNAG_07833 | conserved hypothetical protein                             | 2.37057 |

|            |                                                               |         |
|------------|---------------------------------------------------------------|---------|
| CNAG_04486 | conserved hypothetical protein                                | 2.36144 |
| CNAG_05114 | peroxisomal copper amine oxidase                              | 2.35714 |
| CNAG_04621 | glycogen synthase                                             | 2.35657 |
| CNAG_03838 | conserved hypothetical protein                                | 2.35610 |
| CNAG_01075 | methylmalonate-semialdehyde dehydrogenase                     | 2.35456 |
| CNAG_04024 | sugar transporter                                             | 2.34971 |
| CNAG_04351 | methylmalonate-semialdehyde dehydrogenase                     | 2.34778 |
| CNAG_04025 | transaldolase                                                 | 2.34141 |
| CNAG_04129 | conserved hypothetical protein                                | 2.32348 |
| CNAG_03775 | conserved hypothetical protein                                | 2.32328 |
| CNAG_06539 | monocarboxylic acid transporter                               | 2.32298 |
| CNAG_05436 | conserved hypothetical protein                                | 2.32269 |
| CNAG_02678 | conserved hypothetical protein                                | 2.32179 |
| CNAG_02775 | conserved hypothetical protein                                | 2.32025 |
| CNAG_00797 | acetate-CoA ligase                                            | 2.31362 |
| CNAG_02604 | conserved hypothetical protein                                | 2.31288 |
| CNAG_07702 | conserved hypothetical protein                                | 2.31221 |
| CNAG_05310 | nipsnap family protein                                        | 2.31004 |
| CNAG_03516 | conserved hypothetical protein                                | 2.30414 |
| CNAG_00637 | cystathionine beta-synthase                                   | 2.30178 |
| CNAG_00262 | conserved hypothetical protein                                | 2.29379 |
| CNAG_07533 | conserved hypothetical protein                                | 2.28655 |
| CNAG_03346 | conserved hypothetical protein                                | 2.28080 |
| CNAG_01558 | zinc-binding dehydrogenase                                    | 2.27212 |
| CNAG_04067 | conserved hypothetical protein                                | 2.26529 |
| CNAG_01952 | aryl-alcohol dehydrogenase                                    | 2.26524 |
| CNAG_06242 | high-affinity iron permease CaFTR1                            | 2.26323 |
| CNAG_05861 | conserved hypothetical protein                                | 2.25485 |
| CNAG_02986 | phosphoribosyl-ATP diphosphatase                              | 2.25234 |
| CNAG_06433 | AMP binding protein                                           | 2.24880 |
| CNAG_06229 | conserved hypothetical protein                                | 2.24724 |
| CNAG_02924 | histone H1                                                    | 2.24513 |
| CNAG_01417 | conserved hypothetical protein                                | 2.24198 |
| CNAG_02284 | branched-chain alpha-keto acid dehydrogenase E1-alpha subunit | 2.23809 |
| CNAG_04096 | racemase                                                      | 2.23350 |
| CNAG_04308 | short chain 3-hydroxyacyl-CoA dehydrogenase                   | 2.23077 |
| CNAG_02595 | conserved hypothetical protein                                | 2.22072 |
| CNAG_00393 | 1,4-alpha-glucan-branching enzyme                             | 2.21360 |
| CNAG_06999 | conserved hypothetical protein                                | 2.20405 |
| CNAG_03114 | conserved hypothetical protein                                | 2.20226 |
| CNAG_03085 | predicted protein                                             | 2.19649 |
| CNAG_02230 | phosphoketolase                                               | 2.19568 |
| CNAG_00462 | oxidoreductase                                                | 2.19298 |
| CNAG_01670 | conserved hypothetical protein                                | 2.18764 |
| CNAG_06787 | metacaspase                                                   | 2.18702 |

|            |                                                   |         |
|------------|---------------------------------------------------|---------|
| CNAG_02041 | conserved hypothetical protein                    | 2.18619 |
| CNAG_07747 | acyl-coenzyme A oxidase I                         | 2.18516 |
| CNAG_07874 | sugar transporter                                 | 2.18233 |
| CNAG_03754 | short-chain dehydrogenase/reductase SDR           | 2.17740 |
| CNAG_03142 | conserved hypothetical protein                    | 2.16880 |
| CNAG_04911 | conserved hypothetical protein                    | 2.15883 |
| CNAG_01193 | conserved hypothetical protein                    | 2.15651 |
| CNAG_07832 | predicted protein                                 | 2.15364 |
| CNAG_03076 | predicted protein                                 | 2.15210 |
| CNAG_01314 | vacuolar protein                                  | 2.15122 |
| CNAG_05328 | conserved hypothetical protein                    | 2.15085 |
| CNAG_05320 | oxidoreductase family protein                     | 2.14622 |
| CNAG_02409 | conserved hypothetical protein                    | 2.14122 |
| CNAG_06816 | FCY1                                              | 2.13893 |
| CNAG_06561 | allantoate transporter                            | 2.13641 |
| CNAG_06956 | conserved hypothetical protein                    | 2.13008 |
| CNAG_07743 | predicted protein                                 | 2.12908 |
| CNAG_01040 | carboxypeptidase D                                | 2.12794 |
| CNAG_03859 | transcriptional regulator Medusa                  | 2.12757 |
| CNAG_06531 | conserved hypothetical protein                    | 2.12722 |
| CNAG_06213 | conserved hypothetical protein                    | 2.12537 |
| CNAG_01796 | conserved hypothetical protein                    | 2.12453 |
| CNAG_03828 | aromatic amino acid aminotransferase I            | 2.12397 |
| CNAG_00735 | succinate-semialdehyde dehydrogenase              | 2.12106 |
| CNAG_05971 | hypothetical protein                              | 2.11633 |
| CNAG_07552 | DNA repair protein rad8                           | 2.11550 |
| CNAG_02599 | aldolase                                          | 2.11145 |
| CNAG_00840 | conserved hypothetical protein                    | 2.10871 |
| CNAG_05996 | amino acid transporter                            | 2.10405 |
| CNAG_01252 | thiosulfate sulfurtransferase                     | 2.10127 |
| CNAG_01727 | Hsc70-4                                           | 2.09812 |
| CNAG_03692 | DUF1295 domain-containing protein                 | 2.09688 |
| CNAG_02438 | conserved hypothetical protein                    | 2.09508 |
| CNAG_06876 | alpha-ketoglutarate-dependent taurine dioxygenase | 2.09096 |
| CNAG_05094 | predicted protein                                 | 2.08785 |
| CNAG_03401 | conserved hypothetical protein                    | 2.08697 |
| CNAG_06602 | cysteine-type peptidase                           | 2.08663 |
| CNAG_03294 | conserved hypothetical protein                    | 2.08634 |
| CNAG_00855 | ligase                                            | 2.08473 |
| CNAG_07341 | conserved hypothetical protein                    | 2.07554 |
| CNAG_02189 | alpha-amylase                                     | 2.07481 |
| CNAG_03503 | ATP-binding cassette transporter protein YOR1     | 2.07146 |
| CNAG_03729 | peroxisome targeting sequence binding protein     | 2.06743 |
| CNAG_04795 | adenine nucleotide transporter                    | 2.06701 |
| CNAG_04970 | conserved hypothetical protein                    | 2.06583 |
| CNAG_00254 | NADH dehydrogenase                                | 2.06268 |



|            |                                                       |         |
|------------|-------------------------------------------------------|---------|
| CNAG_06169 | R,R                                                   | 2.06223 |
| CNAG_01542 | taurine catabolism dioxygenase TauD                   | 2.05952 |
| CNAG_04106 | conserved hypothetical protein                        | 2.04573 |
| CNAG_02874 | conserved hypothetical protein                        | 2.04569 |
| CNAG_03597 | conserved hypothetical protein                        | 2.04115 |
| CNAG_04280 | conserved hypothetical protein                        | 2.03136 |
| CNAG_03991 | integral membrane protein                             | 2.02610 |
| CNAG_01851 | conserved hypothetical protein                        | 2.02017 |
| CNAG_01338 | DNA repair protein rhp42                              | 2.01790 |
| CNAG_02733 | monosaccharide transporter                            | 2.01522 |
| CNAG_00883 | transcription factor                                  | 2.01155 |
| CNAG_01584 | hydrolase                                             | 2.00889 |
| CNAG_03016 | chaperone regulator                                   | 2.00647 |
| CNAG_03465 | laccase                                               | 1.99514 |
| CNAG_00678 | urease accessory protein ureG                         | 1.99156 |
| CNAG_06583 | conserved hypothetical protein                        | 1.99124 |
| CNAG_04561 | monooxygenase protein                                 | 1.98361 |
| CNAG_03002 | conserved hypothetical protein                        | 1.98294 |
| CNAG_02170 | conserved hypothetical protein                        | 1.98175 |
| CNAG_06132 | glycerol-1-phosphatase                                | 1.98141 |
| CNAG_05272 | conserved hypothetical protein                        | 1.98113 |
| CNAG_03012 | hypothetical protein                                  | 1.98067 |
| CNAG_06912 | conserved hypothetical protein                        | 1.97842 |
| CNAG_01082 | conserved hypothetical protein                        | 1.97396 |
| CNAG_07908 | aconitate hydratase                                   | 1.97327 |
| CNAG_00149 | conserved hypothetical protein                        | 1.96963 |
| CNAG_06349 | conserved hypothetical protein                        | 1.96958 |
| CNAG_02570 | predicted protein                                     | 1.96539 |
| CNAG_07767 | conserved hypothetical protein                        | 1.96346 |
| CNAG_00032 | aldolase                                              | 1.96312 |
| CNAG_05820 | aromatic-amino-acid transaminase                      | 1.95843 |
| CNAG_05134 | ornithine-oxo-acid transaminase                       | 1.95737 |
| CNAG_04967 | conserved hypothetical protein                        | 1.95715 |
| CNAG_03177 | conserved hypothetical protein                        | 1.95491 |
| CNAG_05686 | hypothetical protein                                  | 1.95434 |
| CNAG_04736 | conserved hypothetical protein                        | 1.95096 |
| CNAG_06066 | nucleoside-diphosphate-sugar epimerase family protein | 1.94889 |
| CNAG_07434 | conserved hypothetical protein                        | 1.94869 |
| CNAG_06705 | predicted protein                                     | 1.94788 |
| CNAG_03837 | protein-L-isoaspartate O-methyltransferase            | 1.94673 |
| CNAG_06805 | predicted protein                                     | 1.93910 |
| CNAG_06777 | fructosyl amino acid oxidase                          | 1.93674 |
| CNAG_02323 | conserved hypothetical protein                        | 1.93279 |
| CNAG_04468 | tartrate dehydrogenase                                | 1.93068 |
| CNAG_05599 | conserved hypothetical protein                        | 1.92217 |
| CNAG_00164 | conserved hypothetical protein                        | 1.92216 |

|            |                                           |         |
|------------|-------------------------------------------|---------|
| CNAG_04889 | conserved hypothetical protein            | 1.92146 |
| CNAG_04947 | high-affinity nicotinic acid transporter  | 1.92143 |
| CNAG_03446 | conserved hypothetical protein            | 1.91684 |
| CNAG_06938 | conserved hypothetical protein            | 1.91681 |
| CNAG_02759 | conserved hypothetical protein            | 1.90748 |
| CNAG_02551 | dihydroxyacetone kinase 1                 | 1.90742 |
| CNAG_05601 | calpain-like protease palB/RIM13          | 1.90074 |
| CNAG_03696 | conserved hypothetical protein            | 1.89321 |
| CNAG_01555 | conserved hypothetical protein            | 1.88851 |
| CNAG_06578 | conserved hypothetical protein            | 1.88688 |
| CNAG_03790 | conserved hypothetical protein            | 1.88551 |
| CNAG_02465 | allantoate permease                       | 1.88457 |
| CNAG_07361 | conserved hypothetical protein            | 1.88373 |
| CNAG_01760 | conserved hypothetical protein            | 1.88342 |
| CNAG_00543 | conserved hypothetical protein            | 1.88200 |
| CNAG_02877 | conserved hypothetical protein            | 1.88165 |
| CNAG_07600 | beta-glucosidase                          | 1.88076 |
| CNAG_07334 | ferric reductase transmembrane component  | 1.87872 |
| CNAG_05330 | trehalose transporter                     | 1.87548 |
| CNAG_05560 | short chain dehydrogenase                 | 1.87523 |
| CNAG_04337 | cation diffusion facilitator              | 1.87499 |
| CNAG_03847 | conserved hypothetical protein            | 1.87293 |
| CNAG_02904 | predicted protein                         | 1.87203 |
| CNAG_01653 | cytokine inducing-glycoprotein            | 1.87038 |
| CNAG_06580 | VosA                                      | 1.86955 |
| CNAG_05500 | conserved hypothetical protein            | 1.86141 |
| CNAG_07539 | purine nucleotide binding protein         | 1.86088 |
| CNAG_00132 | conserved hypothetical protein            | 1.85999 |
| CNAG_00247 | saccharopine dehydrogenase                | 1.85417 |
| CNAG_04416 | major facilitator superfamily transporter | 1.85397 |
| CNAG_05112 | conserved hypothetical protein            | 1.85032 |
| CNAG_05891 | conserved hypothetical protein            | 1.84633 |
| CNAG_02476 | conserved hypothetical protein            | 1.84445 |
| CNAG_06653 | hypothetical protein                      | 1.84436 |
| CNAG_03135 | DUF803 domain membrane protein            | 1.84202 |
| CNAG_04291 | glycosyl-hydrolase                        | 1.84065 |
| CNAG_05587 | conserved hypothetical protein            | 1.83943 |
| CNAG_02184 | predicted protein                         | 1.83723 |
| CNAG_04457 | conserved hypothetical protein            | 1.83551 |
| CNAG_07596 | predicted protein                         | 1.83432 |
| CNAG_06565 | conserved hypothetical protein            | 1.83367 |
| CNAG_07586 | conserved hypothetical protein            | 1.83345 |
| CNAG_01982 | conserved hypothetical protein            | 1.82725 |
| CNAG_02699 | conserved hypothetical protein            | 1.82676 |
| CNAG_05675 | mitochondrial protein                     | 1.82668 |
| CNAG_02539 | amino acid transporter                    | 1.82474 |

|            |                                          |         |
|------------|------------------------------------------|---------|
| CNAG_00537 | carnitine acetyltransferase              | 1.81820 |
| CNAG_01725 | predicted protein                        | 1.81516 |
| CNAG_02049 | proline dehydrogenase                    | 1.81471 |
| CNAG_00036 | Sec14 cytosolic factor                   | 1.81462 |
| CNAG_06024 | peroxin 14                               | 1.81417 |
| CNAG_02165 | cytoplasmic protein                      | 1.80956 |
| CNAG_05138 | exo-beta-1,3-glucanase                   | 1.80670 |
| CNAG_07911 | streptomycin biosynthesis protein StrI   | 1.80646 |
| CNAG_04409 | conserved hypothetical protein           | 1.80053 |
| CNAG_00376 | conserved hypothetical protein           | 1.79875 |
| CNAG_06035 | alcohol dehydrogenase                    | 1.79839 |
| CNAG_06942 | nicotinamide mononucleotide permease     | 1.79792 |
| CNAG_05312 | conserved hypothetical protein           | 1.79726 |
| CNAG_07026 | conserved hypothetical protein           | 1.79397 |
| CNAG_07758 | conserved hypothetical protein           | 1.79300 |
| CNAG_01085 | conserved hypothetical protein           | 1.79189 |
| CNAG_06440 | DNA dependent ATPase                     | 1.78545 |
| CNAG_00549 | conserved hypothetical protein           | 1.78124 |
| CNAG_03734 | conserved hypothetical protein           | 1.77509 |
| CNAG_02058 | hypothetical protein                     | 1.76869 |
| CNAG_07654 | conserved hypothetical protein           | 1.76851 |
| CNAG_02013 | conserved hypothetical protein           | 1.76531 |
| CNAG_04937 | conserved hypothetical protein           | 1.76504 |
| CNAG_07304 | conserved hypothetical protein           | 1.76402 |
| CNAG_07691 | hypothetical protein                     | 1.76164 |
| CNAG_05177 | DNA-directed polymerase kappa            | 1.76110 |
| CNAG_00078 | vacuolar protein                         | 1.75901 |
| CNAG_02429 | conserved hypothetical protein           | 1.75835 |
| CNAG_06238 | conserved hypothetical protein           | 1.75808 |
| CNAG_01383 | conserved hypothetical protein           | 1.75776 |
| CNAG_05592 | calcium-transporting ATPase              | 1.75710 |
| CNAG_07357 | conserved hypothetical protein           | 1.75661 |
| CNAG_01764 | cytoplasmic protein                      | 1.74811 |
| CNAG_00100 | chaperone                                | 1.74380 |
| CNAG_04362 | ATP-dependent RNA helicase DBP5          | 1.74139 |
| CNAG_03290 | STE/STE20/YSK protein kinase             | 1.74044 |
| CNAG_06914 | tubulin gamma chain                      | 1.73828 |
| CNAG_02427 | conserved hypothetical protein           | 1.73793 |
| CNAG_00093 | conserved hypothetical protein           | 1.73457 |
| CNAG_00001 | conserved hypothetical protein           | 1.73366 |
| CNAG_04978 | phytanoyl-CoA dioxygenase family protein | 1.73154 |
| CNAG_00465 | conserved hypothetical protein           | 1.72678 |
| CNAG_05364 | conserved hypothetical protein           | 1.72450 |
| CNAG_04455 | peroxisomal protein                      | 1.72432 |
| CNAG_03445 | conserved hypothetical protein           | 1.72374 |
| CNAG_03407 | predicted protein                        | 1.71745 |

|            |                                         |         |
|------------|-----------------------------------------|---------|
| CNAG_04760 | cytoplasmic protein                     | 1.71582 |
| CNAG_00163 | conserved hypothetical protein          | 1.71541 |
| CNAG_06172 | transketolase                           | 1.71404 |
| CNAG_01069 | conserved hypothetical protein          | 1.71365 |
| CNAG_01633 | conserved hypothetical protein          | 1.71043 |
| CNAG_06506 | conserved hypothetical protein          | 1.70930 |
| CNAG_01359 | RNA polymerase II subunit 7             | 1.70717 |
| CNAG_05066 | conserved hypothetical protein          | 1.70631 |
| CNAG_03794 | endoplasmic reticulum protein           | 1.69899 |
| CNAG_06712 | hypothetical protein                    | 1.69844 |
| CNAG_07584 | conserved hypothetical protein          | 1.69747 |
| CNAG_02336 | conserved hypothetical protein          | 1.69451 |
| CNAG_07656 | conserved hypothetical protein          | 1.69052 |
| CNAG_06010 | fatty aldehyde dehydrogenase            | 1.68720 |
| CNAG_03707 | efflux protein                          | 1.68240 |
| CNAG_02363 | SCR1 protein                            | 1.68135 |
| CNAG_06029 | conserved hypothetical protein          | 1.67896 |
| CNAG_00336 | conserved hypothetical protein          | 1.67846 |
| CNAG_04174 | peroxisome assembly factor-2            | 1.67752 |
| CNAG_07276 | conserved hypothetical protein          | 1.67525 |
| CNAG_01427 | acetyltransferase                       | 1.67498 |
| CNAG_00177 | conserved hypothetical protein          | 1.67371 |
| CNAG_04663 | conserved hypothetical protein          | 1.67174 |
| CNAG_04449 | alpha-1,6-mannosyltransferase           | 1.67066 |
| CNAG_06202 | conserved hypothetical protein          | 1.66929 |
| CNAG_01186 | gp165                                   | 1.66740 |
| CNAG_03519 | cytoplasmic protein                     | 1.66690 |
| CNAG_00460 | conserved hypothetical protein          | 1.66327 |
| CNAG_03697 | hormone-sensitive lipase                | 1.66259 |
| CNAG_01265 | charged multivesicular body protein 6-A | 1.66205 |
| CNAG_04634 | conserved hypothetical protein          | 1.66116 |
| CNAG_02776 | conserved hypothetical protein          | 1.66032 |
| CNAG_03522 | conserved hypothetical protein          | 1.65926 |
| CNAG_02449 | long-chain-fatty-acid-CoA ligase        | 1.65686 |
| CNAG_00907 | conserved hypothetical protein          | 1.65572 |
| CNAG_05871 | conserved hypothetical protein          | 1.65300 |
| CNAG_00011 | conserved hypothetical protein          | 1.65073 |
| CNAG_00745 | other/HAL protein kinase                | 1.65018 |
| CNAG_01611 | conserved hypothetical protein          | 1.64984 |
| CNAG_04953 | conserved hypothetical protein          | 1.64507 |
| CNAG_00897 | glucosidase                             | 1.64317 |
| CNAG_05282 | protein transporter                     | 1.64126 |
| CNAG_00550 | msh5                                    | 1.64100 |
| CNAG_04892 | conserved hypothetical protein          | 1.64031 |
| CNAG_07602 | conserved hypothetical protein          | 1.63900 |
| CNAG_04546 | multidrug transporter                   | 1.63807 |

|            |                                                                  |         |
|------------|------------------------------------------------------------------|---------|
| CNAG_03347 | chaperone                                                        | 1.63788 |
| CNAG_02757 | conserved hypothetical protein                                   | 1.63718 |
| CNAG_00915 | conserved hypothetical protein                                   | 1.63217 |
| CNAG_03655 | predicted protein                                                | 1.63191 |
| CNAG_05735 | hypothetical protein                                             | 1.63141 |
| CNAG_04565 | conserved hypothetical protein                                   | 1.63021 |
| CNAG_03614 | predicted protein                                                | 1.62826 |
| CNAG_01553 | CORD and CS domain-containing protein                            | 1.62252 |
| CNAG_06028 | conserved hypothetical protein                                   | 1.62227 |
| CNAG_01317 | conserved hypothetical protein                                   | 1.62139 |
| CNAG_03059 | conserved hypothetical protein                                   | 1.62025 |
| CNAG_05937 | conserved hypothetical protein                                   | 1.62023 |
| CNAG_05178 | conserved hypothetical protein                                   | 1.61907 |
| CNAG_04185 | conserved hypothetical protein                                   | 1.61283 |
| CNAG_05760 | endoplasmic reticulum protein                                    | 1.61208 |
| CNAG_01635 | DUF1479 domain-containing protein                                | 1.61068 |
| CNAG_03461 | hypothetical protein                                             | 1.60992 |
| CNAG_07703 | conserved hypothetical protein                                   | 1.60866 |
| CNAG_05321 | transposase subfamily                                            | 1.60735 |
| CNAG_01763 | cytoplasmic protein                                              | 1.60668 |
| CNAG_07457 | predicted protein                                                | 1.60666 |
| CNAG_03664 | high-affinity nickel-transporter                                 | 1.60454 |
| CNAG_00581 | endopeptidase                                                    | 1.60258 |
| CNAG_07589 | xylitol dehydrogenase                                            | 1.59974 |
| CNAG_06523 | conserved hypothetical protein                                   | 1.59873 |
| CNAG_07633 | predicted protein                                                | 1.59693 |
| CNAG_06148 | conserved hypothetical protein                                   | 1.59572 |
| CNAG_04333 | conserved hypothetical protein                                   | 1.59197 |
| CNAG_00064 | COPII-coated vesicle protein                                     | 1.59050 |
| CNAG_01441 | conserved hypothetical protein                                   | 1.58852 |
| CNAG_03381 | conserved hypothetical protein                                   | 1.58675 |
| CNAG_05338 | conserved hypothetical protein                                   | 1.58416 |
| CNAG_03292 | conserved hypothetical protein                                   | 1.57768 |
| CNAG_04536 | nicotinamide mononucleotide permease                             | 1.57445 |
| CNAG_06532 | conserved hypothetical protein                                   | 1.57441 |
| CNAG_00403 | mitochondrial protein                                            | 1.57175 |
| CNAG_03113 | trehalose synthase                                               | 1.56900 |
| CNAG_05784 | conserved hypothetical protein                                   | 1.56567 |
| CNAG_07766 | DNA polymerase lambda                                            | 1.56335 |
| CNAG_01604 | haloacid dehalogenase-like hydrolase domain-containing protein 2 | 1.56302 |
| CNAG_04690 | mitochondrial protein                                            | 1.55735 |
| CNAG_07538 | calcium ion transporter                                          | 1.55166 |
| CNAG_04902 | MMS2                                                             | 1.55135 |
| CNAG_02727 | conserved hypothetical protein                                   | 1.54282 |
| CNAG_05656 | conserved hypothetical protein                                   | 1.53874 |

|            |                                                 |         |
|------------|-------------------------------------------------|---------|
| CNAG_02708 | conserved hypothetical protein                  | 1.53844 |
| CNAG_03199 | FAD dependent oxidoreductase superfamily        | 1.53788 |
| CNAG_03024 | AGC-group protein kinase                        | 1.53595 |
| CNAG_04534 | conserved hypothetical protein                  | 1.53224 |
| CNAG_06260 | hydrolase                                       | 1.53108 |
| CNAG_04043 | DUF636 domain-containing protein                | 1.52942 |
| CNAG_02102 | conserved hypothetical protein                  | 1.52886 |
| CNAG_04402 | splicing factor                                 | 1.52308 |
| CNAG_00691 | conserved hypothetical protein                  | 1.52190 |
| CNAG_00131 | alcohol dehydrogenase                           | 1.51843 |
| CNAG_04946 | conserved hypothetical protein                  | 1.51335 |
| CNAG_00625 | ARF guanyl-nucleotide exchange factor           | 1.51216 |
| CNAG_05941 | conserved hypothetical protein                  | 1.51027 |
| CNAG_01759 | vacuolar membrane protein                       | 1.50999 |
| CNAG_01872 | copper ion transporter                          | 1.50789 |
| CNAG_04649 | L-A virus GAG protein N-acetyltransferase       | 1.50430 |
| CNAG_00124 | CAS32p                                          | 1.50023 |
| CNAG_05930 | conserved hypothetical protein                  | 1.49459 |
| CNAG_03377 | conserved hypothetical protein                  | 1.49456 |
| CNAG_07645 | predicted protein                               | 1.49003 |
| CNAG_01776 | HpCH/Hpal aldolase/citrate lyase family protein | 1.48998 |
| CNAG_04403 | CCCH zinc finger protein                        | 1.48912 |
| CNAG_03162 | vacuolar protein                                | 1.48577 |
| CNAG_06534 | hydroxymethylglutaryl-CoA reductase             | 1.48327 |
| CNAG_07319 | conserved hypothetical protein                  | 1.48164 |
| CNAG_05643 | conserved hypothetical protein                  | 1.47788 |
| CNAG_03490 | conserved hypothetical protein                  | 1.47608 |
| CNAG_07826 | hypothetical protein                            | 1.47564 |
| CNAG_05628 | DUF300 domain-containing protein                | 1.47482 |
| CNAG_05718 | multidrug resistance protein fnx1               | 1.47404 |
| CNAG_04618 | PRO1 protein                                    | 1.47154 |
| CNAG_05777 | conserved hypothetical protein                  | 1.46746 |
| CNAG_01919 | conserved hypothetical protein                  | 1.46736 |
| CNAG_03783 | predicted protein                               | 1.46558 |
| CNAG_05281 | predicted protein                               | 1.46539 |
| CNAG_04322 | conserved hypothetical protein                  | 1.46289 |
| CNAG_04086 | conserved hypothetical protein                  | 1.46273 |
| CNAG_07203 | conserved hypothetical protein                  | 1.46189 |
| CNAG_02999 | conserved hypothetical protein                  | 1.46155 |
| CNAG_04602 | conserved hypothetical protein                  | 1.46075 |
| CNAG_00442 | cyclin                                          | 1.45963 |
| CNAG_07603 | conserved hypothetical protein                  | 1.45518 |
| CNAG_02306 | molybdopterin binding domain-containing protein | 1.45436 |
| CNAG_06178 | predicted protein                               | 1.45321 |
| CNAG_06321 | conserved hypothetical protein                  | 1.45307 |
| CNAG_01696 | DNAj protein                                    | 1.45083 |

|            |                                                                    |         |
|------------|--------------------------------------------------------------------|---------|
| CNAG_06732 | conserved hypothetical protein                                     | 1.45045 |
| CNAG_06776 | membrane protein                                                   | 1.44835 |
| CNAG_02023 | conserved hypothetical protein                                     | 1.44832 |
| CNAG_01384 | bodown198                                                          | 1.44648 |
| CNAG_05540 | urease                                                             | 1.44428 |
| CNAG_04275 | metalloendopeptidase                                               | 1.44402 |
| CNAG_04535 | tartrate dehydrogenase                                             | 1.44309 |
| CNAG_02335 | UPF0364 protein                                                    | 1.44300 |
| CNAG_02263 | conserved hypothetical protein                                     | 1.44231 |
| CNAG_07395 | conserved hypothetical protein                                     | 1.44203 |
| CNAG_04617 | small oligopeptide transporter                                     | 1.44119 |
| CNAG_06913 | L-serine ammonia-lyase                                             | 1.43904 |
| CNAG_07421 | conserved hypothetical protein                                     | 1.43865 |
| CNAG_02532 | D-amino-acid oxidase                                               | 1.43572 |
| CNAG_03117 | conserved hypothetical protein                                     | 1.43452 |
| CNAG_01695 | conserved hypothetical protein                                     | 1.43392 |
| CNAG_06121 | conserved hypothetical protein                                     | 1.43336 |
| CNAG_05316 | inositol oxygenase                                                 | 1.42744 |
| CNAG_04346 | dihydrodipicolinate synthase                                       | 1.42546 |
| CNAG_06538 | monocarboxylic acid transporter                                    | 1.42524 |
| CNAG_01031 | conserved hypothetical protein                                     | 1.42404 |
| CNAG_05017 | GabA permease                                                      | 1.42233 |
| CNAG_06704 | predicted protein                                                  | 1.42147 |
| CNAG_03852 | predicted protein                                                  | 1.42078 |
| CNAG_09011 | NADH dehydrogenase subunit 3                                       | 1.42068 |
| CNAG_01493 | conserved hypothetical protein                                     | 1.41864 |
| CNAG_02052 | dimeric dihydrodiol dehydrogenase                                  | 1.41844 |
| CNAG_04898 | MFS transporter                                                    | 1.41322 |
| CNAG_06330 | conserved hypothetical protein                                     | 1.41189 |
| CNAG_02344 | uracil phosphoribosyltransferase                                   | 1.41185 |
| CNAG_05265 | hypothetical protein                                               | 1.41180 |
| CNAG_02685 | conserved hypothetical protein                                     | 1.41077 |
| CNAG_06217 | conserved hypothetical protein                                     | 1.41058 |
| CNAG_07780 | farnesyltranstransferase                                           | 1.40704 |
| CNAG_02752 | short-chain dehydrogenase                                          | 1.40668 |
| CNAG_03713 | efflux protein EncT                                                | 1.40533 |
| CNAG_03078 | type I phosphodiesterase/nucleotide pyrophosphatase family protein | 1.40490 |
| CNAG_04209 | voltage-gated potassium channel beta-2 subunit                     | 1.40438 |
| CNAG_07768 | predicted protein                                                  | 1.40293 |
| CNAG_07449 | amino acid transporter                                             | 1.39889 |
| CNAG_04626 | conserved hypothetical protein                                     | 1.39642 |
| CNAG_00816 | microtubule binding protein                                        | 1.39474 |
| CNAG_06601 | amidohydrolase family protein                                      | 1.39207 |
| CNAG_06485 | hexose transporter protein                                         | 1.39184 |
| CNAG_03036 | potassium ion transporter                                          | 1.39158 |

|            |                                       |         |
|------------|---------------------------------------|---------|
| CNAG_03564 | conserved hypothetical protein        | 1.39002 |
| CNAG_04862 | glutamate synthase                    | 1.38902 |
| CNAG_02289 | Rab4                                  | 1.38901 |
| CNAG_05527 | helicase sen1                         | 1.38706 |
| CNAG_06106 | chaperone regulator                   | 1.38448 |
| CNAG_06295 | cytoplasmic protein                   | 1.38299 |
| CNAG_05022 | conserved hypothetical protein        | 1.38227 |
| CNAG_04034 | conserved hypothetical protein        | 1.38079 |
| CNAG_06640 | carboxypeptidase C                    | 1.37852 |
| CNAG_03133 | UDP-glucose,sterol transferase        | 1.37705 |
| CNAG_03562 | D-amino-acid oxidase                  | 1.37653 |
| CNAG_06419 | conserved hypothetical protein        | 1.37517 |
| CNAG_06285 | predicted protein                     | 1.37460 |
| CNAG_00968 | conserved hypothetical protein        | 1.37366 |
| CNAG_03262 | inositol-1(or 4)-monophosphatase      | 1.37332 |
| CNAG_05221 | histone H2A.4                         | 1.37124 |
| CNAG_04485 | long-chain-fatty-acid-CoA-ligase      | 1.37013 |
| CNAG_07779 | D-glycerate 3-kinase                  | 1.36739 |
| CNAG_04677 | xylitol dehydrogenase                 | 1.36619 |
| CNAG_02155 | predicted protein                     | 1.36575 |
| CNAG_03241 | conserved hypothetical protein        | 1.36574 |
| CNAG_07909 | MmLim15 protein                       | 1.36446 |
| CNAG_07422 | delayed-type hypersensitivity antigen | 1.36337 |
| CNAG_03558 | predicted protein                     | 1.36279 |
| CNAG_00961 | conserved hypothetical protein        | 1.36168 |
| CNAG_03776 | conserved hypothetical protein        | 1.36162 |
| CNAG_00030 | D-3-phosphoglycerate dehydrogenase    | 1.36118 |
| CNAG_07308 | conserved hypothetical protein        | 1.35804 |
| CNAG_06579 | conserved hypothetical protein        | 1.35794 |
| CNAG_06102 | eukaryotic ADP/ATP carrier            | 1.35707 |
| CNAG_00879 | glutamate dehydrogenase               | 1.35550 |
| CNAG_06985 | beta-glucosidase                      | 1.35521 |
| CNAG_01497 | integral membrane protein             | 1.35354 |
| CNAG_06105 | conserved hypothetical protein        | 1.35066 |
| CNAG_07390 | conserved hypothetical protein        | 1.34972 |
| CNAG_01445 | APG9                                  | 1.34890 |
| CNAG_06073 | predicted protein                     | 1.34713 |
| CNAG_00964 | conserved hypothetical protein        | 1.34566 |
| CNAG_02554 | sugar transporter                     | 1.34494 |
| CNAG_04834 | MFS transporter                       | 1.34457 |
| CNAG_04122 | galactose dehydrogenase               | 1.34290 |
| CNAG_02168 | glucoamylase s1/s2                    | 1.34204 |
| CNAG_01476 | conserved hypothetical protein        | 1.33770 |
| CNAG_06536 | monocarboxylic acid transporter       | 1.33760 |
| CNAG_03668 | conserved hypothetical protein        | 1.33704 |
| CNAG_01207 | conserved hypothetical protein        | 1.33387 |



|            |                                        |         |
|------------|----------------------------------------|---------|
| CNAG_00003 | drug transporter                       | 1.33303 |
| CNAG_05350 | conserved hypothetical protein         | 1.33225 |
| CNAG_00752 | transducin family protein              | 1.33205 |
| CNAG_07924 | RNA polymerase II transcription factor | 1.32921 |
| CNAG_07573 | DNA ligase 4                           | 1.32211 |
| CNAG_05746 | conserved hypothetical protein         | 1.32108 |
| CNAG_04558 | predicted protein                      | 1.32059 |
| CNAG_00905 | MFS transporter                        | 1.32044 |
| CNAG_00079 | conserved hypothetical protein         | 1.32002 |
| CNAG_07305 | conserved hypothetical protein         | 1.32000 |
| CNAG_01706 | predicted protein                      | 1.31969 |
| CNAG_05843 | translation initiation factor eIF-4E   | 1.31923 |
| CNAG_00692 | FAD dependent oxidoreductase           | 1.31852 |
| CNAG_04496 | rab GTPase activator                   | 1.31672 |
| CNAG_03216 | CAMK/CAMKL/MARK protein kinase         | 1.31554 |
| CNAG_05180 | conserved hypothetical protein         | 1.31539 |
| CNAG_03851 | conserved hypothetical protein         | 1.31438 |
| CNAG_06672 | formate dehydrogenase                  | 1.31024 |
| CNAG_06522 | conserved hypothetical protein         | 1.31020 |
| CNAG_05397 | conserved hypothetical protein         | 1.30753 |
| CNAG_00305 | chaperone activator                    | 1.30700 |
| CNAG_02889 | predicted protein                      | 1.30697 |
| CNAG_01621 | conserved hypothetical protein         | 1.30449 |
| CNAG_00542 | conserved hypothetical protein         | 1.30424 |
| CNAG_02927 | thioredoxin family protein             | 1.30398 |
| CNAG_03825 | conserved hypothetical protein         | 1.30316 |
| CNAG_02398 | conserved hypothetical protein         | 1.30231 |
| CNAG_06214 | predicted protein                      | 1.30202 |
| CNAG_02066 | conserved hypothetical protein         | 1.30185 |
| CNAG_06161 | Pip5k3 protein                         | 1.30148 |
| CNAG_02305 | conserved hypothetical protein         | 1.30137 |
| CNAG_04784 | monosaccharide transporter             | 1.30047 |
| CNAG_03679 | conserved hypothetical protein         | 1.29997 |
| CNAG_01926 | peroxisome targeting signal receptor   | 1.29946 |
| CNAG_07739 | conserved hypothetical protein         | 1.29855 |
| CNAG_01620 | conserved hypothetical protein         | 1.29690 |
| CNAG_00419 | conserved hypothetical protein         | 1.29651 |
| CNAG_06807 | conserved hypothetical protein         | 1.29558 |
| CNAG_05478 | SNF7 family protein                    | 1.29467 |
| CNAG_05665 | conserved hypothetical protein         | 1.29330 |
| CNAG_03841 | conserved hypothetical protein         | 1.29224 |
| CNAG_06853 | hypothetical protein                   | 1.28987 |
| CNAG_05693 | conserved hypothetical protein         | 1.28932 |
| CNAG_06244 | conserved hypothetical protein         | 1.28806 |
| CNAG_00264 | nuclease I                             | 1.28730 |
| CNAG_02939 | Pex3p                                  | 1.28578 |

|            |                                     |         |
|------------|-------------------------------------|---------|
| CNAG_01472 | endoplasmic reticulum protein       | 1.28552 |
| CNAG_03122 | predicted protein                   | 1.28550 |
| CNAG_06907 | conserved hypothetical protein      | 1.28446 |
| CNAG_04140 | conserved hypothetical protein      | 1.28327 |
| CNAG_04401 | vesicular-fusion protein            | 1.28322 |
| CNAG_02943 | cytoplasmic protein                 | 1.28271 |
| CNAG_00681 | conserved hypothetical protein      | 1.28255 |
| CNAG_05847 | thioredoxin-disulfide reductase     | 1.28139 |
| CNAG_06338 | ABC transporter PMR5                | 1.27872 |
| CNAG_04557 | predicted protein                   | 1.27681 |
| CNAG_03275 | glutaryl-CoA dehydrogenase          | 1.27507 |
| CNAG_03447 | conserved hypothetical protein      | 1.27409 |
| CNAG_03382 | conserved hypothetical protein      | 1.27306 |
| CNAG_01675 | tagatose-bisphosphate aldolase      | 1.27266 |
| CNAG_03913 | conserved hypothetical protein      | 1.27211 |
| CNAG_04519 | D-serine dehydratase                | 1.27100 |
| CNAG_05072 | endopeptidase                       | 1.27097 |
| CNAG_02555 | conserved hypothetical protein      | 1.26966 |
| CNAG_03367 | uridine kinase                      | 1.26927 |
| CNAG_00152 | conserved hypothetical protein      | 1.26909 |
| CNAG_02592 | thioredoxin reductase GliT          | 1.26800 |
| CNAG_03526 | conserved hypothetical protein      | 1.26773 |
| CNAG_05355 | ubiquitin-protein ligase            | 1.26504 |
| CNAG_05191 | conserved hypothetical protein      | 1.26499 |
| CNAG_02504 | conserved hypothetical protein      | 1.26487 |
| CNAG_07558 | wos2 protein                        | 1.26217 |
| CNAG_02524 | conserved hypothetical protein      | 1.26201 |
| CNAG_07401 | predicted protein                   | 1.26173 |
| CNAG_05404 | histone-lysine n-methyltransferase  | 1.26141 |
| CNAG_05003 | conserved hypothetical protein      | 1.26000 |
| CNAG_05771 | telomere length control protein     | 1.25751 |
| CNAG_00547 | conserved hypothetical protein      | 1.25376 |
| CNAG_06247 | conserved hypothetical protein      | 1.25310 |
| CNAG_02095 | cyclin                              | 1.25303 |
| CNAG_01605 | rossman fold oxidoreductase         | 1.25281 |
| CNAG_00524 | acetyl-Coenzyme A acyltransferase 2 | 1.25271 |
| CNAG_09001 | conserved hypothetical protein      | 1.25173 |
| CNAG_04707 | conserved hypothetical protein      | 1.25168 |
| CNAG_06483 | conserved hypothetical protein      | 1.25125 |
| CNAG_00399 | transformer-2-beta isoform 3        | 1.25094 |
| CNAG_04562 | predicted protein                   | 1.25016 |
| CNAG_03709 | conserved hypothetical protein      | 1.25000 |
| CNAG_07587 | hypothetical protein                | 1.24979 |
| CNAG_03654 | ATP dependent DNA helicase          | 1.24854 |
| CNAG_03488 | conserved hypothetical protein      | 1.24850 |
| CNAG_06291 | deacetylase                         | 1.24764 |

|            |                                               |         |
|------------|-----------------------------------------------|---------|
| CNAG_07823 | predicted protein                             | 1.24750 |
| CNAG_02219 | conserved hypothetical protein                | 1.24626 |
| CNAG_01736 | predicted protein                             | 1.24238 |
| CNAG_03511 | conserved hypothetical protein                | 1.24002 |
| CNAG_03563 | aspartate-tRNA ligase                         | 1.23960 |
| CNAG_00456 | conserved hypothetical protein                | 1.23933 |
| CNAG_02375 | polyphosphoinositide phosphatase              | 1.23755 |
| CNAG_02586 | sugar transporter                             | 1.23724 |
| CNAG_02864 | predicted protein                             | 1.23667 |
| CNAG_06517 | cytoplasmic protein                           | 1.23644 |
| CNAG_06809 | other/IKS protein kinase                      | 1.23578 |
| CNAG_07785 | predicted protein                             | 1.23451 |
| CNAG_04632 | uracil permease                               | 1.23404 |
| CNAG_06540 | dihydroxy-acid dehydratase                    | 1.22639 |
| CNAG_03733 | conserved hypothetical protein                | 1.22609 |
| CNAG_06497 | microsomal epoxide hydrolase                  | 1.22562 |
| CNAG_04751 | conserved hypothetical protein                | 1.22557 |
| CNAG_06843 | predicted protein                             | 1.22556 |
| CNAG_05446 | Kex2                                          | 1.22532 |
| CNAG_06308 | WD repeat protein                             | 1.22494 |
| CNAG_07727 | predicted protein                             | 1.22476 |
| CNAG_00360 | nuclear protein SNF4                          | 1.22422 |
| CNAG_02452 | conserved hypothetical protein                | 1.22388 |
| CNAG_00172 | kinesin                                       | 1.22353 |
| CNAG_04523 | glyceraldehyde 3-phosphate dehydrogenase      | 1.22332 |
| CNAG_03542 | arginase                                      | 1.22240 |
| CNAG_06498 | conserved hypothetical protein                | 1.22228 |
| CNAG_03752 | conserved hypothetical protein                | 1.22171 |
| CNAG_05835 | conserved hypothetical protein                | 1.22073 |
| CNAG_03242 | peroxisomal membrane protein                  | 1.22000 |
| CNAG_07500 | hypothetical protein                          | 1.21638 |
| CNAG_06116 | conserved hypothetical protein                | 1.21536 |
| CNAG_04960 | conserved hypothetical protein                | 1.21500 |
| CNAG_00090 | conserved hypothetical protein                | 1.21220 |
| CNAG_07668 | conserved hypothetical protein                | 1.21123 |
| CNAG_07704 | conserved hypothetical protein                | 1.20963 |
| CNAG_05472 | endodeoxyribonuclease                         | 1.20892 |
| CNAG_06373 | conserved hypothetical protein                | 1.20886 |
| CNAG_05870 | conserved hypothetical protein                | 1.20860 |
| CNAG_00031 | conserved hypothetical protein                | 1.20755 |
| CNAG_07521 | conserved hypothetical protein                | 1.20750 |
| CNAG_03051 | polyamine transporter                         | 1.20707 |
| CNAG_02781 | dihydrodipicolinate synthetase family protein | 1.20564 |
| CNAG_03876 | RHEB small monomeric GTPase                   | 1.20553 |
| CNAG_03935 | endothelin-converting enzyme 1                | 1.20370 |
| CNAG_01658 | conserved hypothetical protein                | 1.20333 |

|            |                                          |         |
|------------|------------------------------------------|---------|
| CNAG_05116 | beta DNA polymerase                      | 1.20281 |
| CNAG_01102 | oxidoreductase                           | 1.20174 |
| CNAG_02841 | cytochrome P450 monooxygenase pc-2       | 1.20114 |
| CNAG_01601 | lipase                                   | 1.20024 |
| CNAG_07042 | conserved hypothetical protein           | 1.19956 |
| CNAG_00967 | conserved hypothetical protein           | 1.19886 |
| CNAG_01545 | conserved hypothetical protein           | 1.19868 |
| CNAG_02540 | conserved hypothetical protein           | 1.19814 |
| CNAG_02600 | tartrate transporter                     | 1.19651 |
| CNAG_07701 | conserved hypothetical protein           | 1.19637 |
| CNAG_05732 | predicted protein                        | 1.19528 |
| CNAG_05670 | conserved hypothetical protein           | 1.19516 |
| CNAG_07808 | alanine-glyoxylate transaminase          | 1.19493 |
| CNAG_07683 | conserved hypothetical protein           | 1.19447 |
| CNAG_01086 | conserved hypothetical protein           | 1.19087 |
| CNAG_04611 | ubiquitin-protein ligase                 | 1.18942 |
| CNAG_01689 | conserved hypothetical protein           | 1.18923 |
| CNAG_02873 | signal peptidase I                       | 1.18899 |
| CNAG_06901 | UDP-N-acetylglucosamine-dolichyl         | 1.18875 |
| CNAG_04724 | Ube3c protein                            | 1.18867 |
| CNAG_02728 | peroxisomal membrane protein pex13       | 1.18797 |
| CNAG_05053 | conserved hypothetical protein           | 1.18711 |
| CNAG_07542 | conserved hypothetical protein           | 1.18675 |
| CNAG_04863 | conserved hypothetical protein           | 1.18581 |
| CNAG_04158 | transcription corepressor                | 1.18549 |
| CNAG_01954 | aldo/keto reductase                      | 1.18462 |
| CNAG_01185 | hsp70-like protein                       | 1.18084 |
| CNAG_02718 | NAD binding dehydrogenase family protein | 1.18014 |
| CNAG_00660 | histone deacetylase                      | 1.17983 |
| CNAG_02164 | conserved hypothetical protein           | 1.17907 |
| CNAG_07906 | conserved hypothetical protein           | 1.17859 |
| CNAG_05469 | synoviolin                               | 1.17838 |
| CNAG_06973 | conserved hypothetical protein           | 1.17769 |
| CNAG_00173 | conserved hypothetical protein           | 1.17616 |
| CNAG_03657 | conserved hypothetical protein           | 1.17432 |
| CNAG_06968 | hypothetical protein                     | 1.17229 |
| CNAG_04493 | ubiquitin specific peptidase 48          | 1.17085 |
| CNAG_02353 | conserved hypothetical protein           | 1.17062 |
| CNAG_01479 | conserved hypothetical protein           | 1.17012 |
| CNAG_04195 | O-methyltransferase                      | 1.16539 |
| CNAG_01095 | BEM46 family protein                     | 1.16531 |
| CNAG_02903 | zinc-type alcohol dehydrogenase          | 1.16445 |
| CNAG_03212 | fork head domain-containing protein      | 1.16354 |
| CNAG_00412 | predicted protein                        | 1.16183 |
| CNAG_00859 | conserved hypothetical protein           | 1.16160 |
| CNAG_04228 | 2,4-dienoyl-CoA reductase                | 1.16134 |

|            |                                                                        |         |
|------------|------------------------------------------------------------------------|---------|
| CNAG_01210 | predicted protein                                                      | 1.15936 |
| CNAG_04520 | D-aminoacylase                                                         | 1.15757 |
| CNAG_00848 | conserved hypothetical protein                                         | 1.15724 |
| CNAG_03269 | aldehyde dehydrogenase                                                 | 1.15589 |
| CNAG_05290 | transcription cofactor                                                 | 1.15424 |
| CNAG_07734 | predicted protein                                                      | 1.15337 |
| CNAG_03531 | 3-beta hydroxysteroid dehydrogenase/isomerase                          | 1.15115 |
| CNAG_01331 | conserved hypothetical protein                                         | 1.15003 |
| CNAG_00057 | fructose-bisphosphatase                                                | 1.14989 |
| CNAG_00181 | macrophage erythroblast attacher isoform 1                             | 1.14950 |
| CNAG_02043 | conserved hypothetical protein                                         | 1.14910 |
| CNAG_03683 | short-chain dehydrogenase/reductase SDR                                | 1.14897 |
| CNAG_06868 | enolase 1                                                              | 1.14725 |
| CNAG_07617 | conserved hypothetical protein                                         | 1.14610 |
| CNAG_04886 | conserved hypothetical protein                                         | 1.14358 |
| CNAG_01541 | conserved hypothetical protein                                         | 1.14099 |
| CNAG_00047 | kinase                                                                 | 1.14087 |
| CNAG_01882 | protein-lysine N-methyltransferase                                     | 1.13994 |
| CNAG_02464 | cytoplasmic protein                                                    | 1.13581 |
| CNAG_00726 | conserved hypothetical protein                                         | 1.13544 |
| CNAG_06836 | oxidoreductase                                                         | 1.13446 |
| CNAG_05963 | conserved hypothetical protein                                         | 1.13387 |
| CNAG_00284 | efflux protein EncT                                                    | 1.13022 |
| CNAG_03082 | cupin domain-containing protein                                        | 1.12871 |
| CNAG_05293 | glycogenin glucosyltransferase                                         | 1.12747 |
| CNAG_01059 | vacuolar membrane protein                                              | 1.12585 |
| CNAG_07729 | hypothetical protein                                                   | 1.12558 |
| CNAG_05517 | conserved hypothetical protein                                         | 1.12487 |
| CNAG_06266 | conserved hypothetical protein                                         | 1.12081 |
| CNAG_01041 | conserved hypothetical protein                                         | 1.12068 |
| CNAG_01540 | dehydrogenase                                                          | 1.11793 |
| CNAG_05840 | family with sequence similarity 96                                     | 1.11754 |
| CNAG_05046 | predicted protein                                                      | 1.11732 |
| CNAG_06218 | amidase protein                                                        | 1.11690 |
| CNAG_04495 | conserved hypothetical protein                                         | 1.11446 |
| CNAG_06311 | cytoplasmic protein                                                    | 1.11407 |
| CNAG_03489 | RNA recognition domain-containing protein (RRM)-<br>containing protein | 1.11399 |
| CNAG_06499 | Ppapdc1 protein                                                        | 1.10954 |
| CNAG_04294 | predicted protein                                                      | 1.10922 |
| CNAG_02293 | conserved hypothetical protein                                         | 1.10920 |
| CNAG_04219 | lactoylglutathione lyase                                               | 1.10785 |
| CNAG_05327 | predicted protein                                                      | 1.10437 |
| CNAG_00171 | peroxisome assembly protein                                            | 1.10290 |
| CNAG_04157 | conserved hypothetical protein                                         | 1.10264 |
| CNAG_01347 | co-chaperone                                                           | 1.10223 |

|            |                                          |         |
|------------|------------------------------------------|---------|
| CNAG_07621 | conserved hypothetical protein           | 1.10152 |
| CNAG_01213 | conserved hypothetical protein           | 1.09836 |
| CNAG_05539 | conserved hypothetical protein           | 1.09778 |
| CNAG_04188 | O-methyltransferase                      | 1.09750 |
| CNAG_06134 | conserved hypothetical protein           | 1.09723 |
| CNAG_07616 | C6 zinc finger domain-containing protein | 1.09640 |
| CNAG_06966 | conserved hypothetical protein           | 1.09593 |
| CNAG_03193 | conserved hypothetical protein           | 1.09592 |
| CNAG_07512 | conserved hypothetical protein           | 1.09542 |
| CNAG_00710 | glutamine synthetase                     | 1.09459 |
| CNAG_06562 | predicted protein                        | 1.09441 |
| CNAG_06806 | ETF1                                     | 1.09407 |
| CNAG_03660 | lipoyltransferase                        | 1.09221 |
| CNAG_07335 | L-cystine transporter                    | 1.09100 |
| CNAG_02169 | conserved hypothetical protein           | 1.09067 |
| CNAG_07316 | alcohol dehydrogenase                    | 1.08982 |
| CNAG_05677 | phospholipase                            | 1.08889 |
| CNAG_02434 | copper chaperone                         | 1.08851 |
| CNAG_02172 | ubiquitin-protein ligase                 | 1.08847 |
| CNAG_04725 | conserved hypothetical protein           | 1.08842 |
| CNAG_02531 | CMGC/MAPK/ERK protein kinase             | 1.08831 |
| CNAG_07508 | conserved hypothetical protein           | 1.08797 |
| CNAG_07796 | uroporphyrin-III C-methyltransferase     | 1.08793 |
| CNAG_06757 | conserved hypothetical protein           | 1.08776 |
| CNAG_02839 | conserved hypothetical protein           | 1.08726 |
| CNAG_02501 | conserved hypothetical protein           | 1.08502 |
| CNAG_09009 | cytochrome oxidase subunit 1             | 1.08495 |
| CNAG_01279 | ubiquitin-conjugating enzyme E2S         | 1.08469 |
| CNAG_04748 | conserved hypothetical protein           | 1.08432 |
| CNAG_05015 | catalase 4                               | 1.08365 |
| CNAG_02724 | conserved hypothetical protein           | 1.08307 |
| CNAG_02771 | DNA supercoiling                         | 1.08253 |
| CNAG_05973 | serine carboxypeptidase                  | 1.08003 |
| CNAG_01781 | conserved hypothetical protein           | 1.07992 |
| CNAG_07392 | hypothetical protein                     | 1.07922 |
| CNAG_05528 | conserved hypothetical protein           | 1.07713 |
| CNAG_06801 | conserved hypothetical protein           | 1.07589 |
| CNAG_04039 | iron sulfur cluster assembly protein 1   | 1.07397 |
| CNAG_01078 | aldehyde dehydrogenase                   | 1.07378 |
| CNAG_07866 | predicted protein                        | 1.07293 |
| CNAG_00049 | conserved hypothetical protein           | 1.07185 |
| CNAG_02819 | vacuolar membrane protein                | 1.07156 |
| CNAG_01824 | transmembrane protein                    | 1.06984 |
| CNAG_03400 | oxidoreductase                           | 1.06984 |
| CNAG_05981 | conserved hypothetical protein           | 1.06958 |
| CNAG_04474 | monocarboxylic acid transporter          | 1.06866 |

|            |                                           |         |
|------------|-------------------------------------------|---------|
| CNAG_07718 | multidomain RhoGEF                        | 1.06815 |
| CNAG_03771 | DNA binding protein Ncp1                  | 1.06613 |
| CNAG_07315 | conserved hypothetical protein            | 1.06503 |
| CNAG_06443 | heat shock protein 70                     | 1.06454 |
| CNAG_07632 | aspartate aminotransferase                | 1.06368 |
| CNAG_00909 | HAL3B protein                             | 1.06284 |
| CNAG_05479 | conserved hypothetical protein            | 1.06225 |
| CNAG_07742 | predicted protein                         | 1.06205 |
| CNAG_02453 | conserved hypothetical protein            | 1.06050 |
| CNAG_03046 | conserved hypothetical protein            | 1.06029 |
| CNAG_00866 | transketolase                             | 1.05917 |
| CNAG_01950 | conserved hypothetical protein            | 1.05894 |
| CNAG_07706 | conserved hypothetical protein            | 1.05885 |
| CNAG_00661 | conserved hypothetical protein            | 1.05833 |
| CNAG_04040 | AGC/RSK protein kinase                    | 1.05573 |
| CNAG_01977 | predicted protein                         | 1.05523 |
| CNAG_02206 | predicted protein                         | 1.05349 |
| CNAG_06243 | conserved hypothetical protein            | 1.05337 |
| CNAG_00096 | conserved hypothetical protein            | 1.05010 |
| CNAG_05608 | conserved hypothetical protein            | 1.04966 |
| CNAG_00287 | cytoplasmic protein                       | 1.04899 |
| CNAG_07933 | hypothetical protein                      | 1.04659 |
| CNAG_04002 | Hob3p                                     | 1.04479 |
| CNAG_03083 | cupin domain-containing protein           | 1.04012 |
| CNAG_04675 | conserved hypothetical protein            | 1.04003 |
| CNAG_03877 | adaptor complex subunit medium chain 3    | 1.03990 |
| CNAG_07402 | pantothenate transporter                  | 1.03916 |
| CNAG_00923 | membrane protein                          | 1.03866 |
| CNAG_02872 | conserved hypothetical protein            | 1.03605 |
| CNAG_03738 | pantetheine-phosphate adenylyltransferase | 1.03571 |
| CNAG_07754 | conserved hypothetical protein            | 1.03455 |
| CNAG_06944 | conserved hypothetical protein            | 1.03452 |
| CNAG_07011 | conserved hypothetical protein            | 1.03411 |
| CNAG_07612 | conserved hypothetical protein            | 1.03396 |
| CNAG_01156 | CAP2p                                     | 1.03336 |
| CNAG_02362 | conserved hypothetical protein            | 1.03264 |
| CNAG_06791 | conserved hypothetical protein            | 1.03225 |
| CNAG_01987 | carbohydrate binding protein              | 1.03205 |
| CNAG_02283 | glucan 1,4-alpha-glucosidase              | 1.03077 |
| CNAG_03745 | predicted protein                         | 1.02990 |
| CNAG_06490 | CAMK/CAMKL protein kinase                 | 1.02946 |
| CNAG_02430 | ABC transporter ABCC.6                    | 1.02896 |
| CNAG_00851 | conserved hypothetical protein            | 1.02875 |
| CNAG_06482 | amidase                                   | 1.02813 |
| CNAG_00586 | conserved hypothetical protein            | 1.02618 |
| CNAG_02471 | conserved hypothetical protein            | 1.02601 |

|            |                                                    |         |
|------------|----------------------------------------------------|---------|
| CNAG_00680 | conserved hypothetical protein                     | 1.02508 |
| CNAG_00157 | conserved hypothetical protein                     | 1.02459 |
| CNAG_07753 | conserved hypothetical protein                     | 1.02409 |
| CNAG_04952 | put. CPS1 protein                                  | 1.02405 |
| CNAG_04193 | conserved hypothetical protein                     | 1.02337 |
| CNAG_03889 | conserved hypothetical protein                     | 1.02331 |
| CNAG_03944 | chaperone regulator                                | 1.02253 |
| CNAG_00736 | exocyst protein                                    | 1.02213 |
| CNAG_06592 | ubiquitin conjugating enzyme                       | 1.02181 |
| CNAG_00823 | cadmium ion transporter                            | 1.02174 |
| CNAG_07531 | conserved hypothetical protein                     | 1.02028 |
| CNAG_04622 | endoplasmic reticulum protein                      | 1.01935 |
| CNAG_01071 | predicted protein                                  | 1.01812 |
| CNAG_01790 | conserved hypothetical protein                     | 1.01740 |
| CNAG_02548 | cobalamin synthesis protein                        | 1.01602 |
| CNAG_05284 | conserved hypothetical protein                     | 1.01544 |
| CNAG_05083 | esterase/lipase                                    | 1.01543 |
| CNAG_05766 | endoglucanase C                                    | 1.01493 |
| CNAG_00801 | conserved hypothetical protein                     | 1.01482 |
| CNAG_03368 | microtubule Associated protein                     | 1.01462 |
| CNAG_03719 | conserved hypothetical protein                     | 1.01263 |
| CNAG_04479 | conserved hypothetical protein                     | 1.01165 |
| CNAG_01081 | conserved hypothetical protein                     | 1.01121 |
| CNAG_00328 | single-stranded DNA specific endodeoxyribonuclease | 1.01055 |
| CNAG_07838 | cytoplasmic protein                                | 1.00931 |
| CNAG_05038 | conserved hypothetical protein                     | 1.00868 |
| CNAG_05499 | conserved hypothetical protein                     | 1.00867 |
| CNAG_02988 | acetyltransferase                                  | 1.00821 |
| CNAG_04142 | tartrate transporter                               | 1.00683 |
| CNAG_06584 | conserved hypothetical protein                     | 1.00656 |
| CNAG_00122 | alpha-amylase                                      | 1.00543 |
| CNAG_07818 | conserved hypothetical protein                     | 1.00505 |
| CNAG_03990 | conserved hypothetical protein                     | 1.00440 |
| CNAG_04511 | conserved hypothetical protein                     | 1.00436 |
| CNAG_07355 | conserved hypothetical protein                     | 1.00432 |
| CNAG_02772 | conserved hypothetical protein                     | 1.00326 |
| CNAG_05018 | conserved hypothetical protein                     | 1.00304 |
| CNAG_07828 | predicted protein                                  | 1.00185 |
| CNAG_00868 | predicted protein                                  | 1.00176 |
| CNAG_06463 | predicted protein                                  | 1.00029 |
| CNAG_03408 | conserved hypothetical protein                     | 1.00011 |
