# Supplementary material
Source: PubMed Central journal article supplement (PMC6299223)
Supplement: mbo006184232st2.pdf [file mbo006184232st2.pdf]

Table S2. Genome-wide expression level changes after transition from YPD to starvation media

| GeneID     | NAME                                  | Log2(STARVE/YPD) |
|------------|---------------------------------------|------------------|
| CNAG_03058 | Hmp1 protein                          | 11.07030         |
| CNAG_02701 | conserved hypothetical protein        | 8.86404          |
| CNAG_01047 | conserved hypothetical protein        | 8.27157          |
| CNAG_01052 | conserved hypothetical protein        | 7.79931          |
| CNAG_06312 | hypothetical protein                  | 7.74992          |
| CNAG_07939 | predicted protein                     | 7.65261          |
| CNAG_03873 | conserved hypothetical protein        | 7.61081          |
| CNAG_04105 | hypothetical protein                  | 7.46038          |
| CNAG_05683 | conserved hypothetical protein        | 7.42642          |
| CNAG_06220 | allergen                              | 7.32911          |
| CNAG_00091 | conserved hypothetical protein        | 7.30681          |
| CNAG_03566 | conserved hypothetical protein        | 7.23060          |
| CNAG_02489 | mannitol-1-phosphate dehydrogenase    | 7.19003          |
| CNAG_03143 | conserved hypothetical protein        | 7.11915          |
| CNAG_00052 | conserved hypothetical protein        | 6.97867          |
| CNAG_06453 | conserved hypothetical protein        | 6.97607          |
| CNAG_07422 | delayed-type hypersensitivity antigen | 6.89673          |
| CNAG_00896 | transcription factor                  | 6.72196          |
| CNAG_05736 | predicted protein                     | 6.66387          |
| CNAG_07869 | conserved hypothetical protein        | 6.56404          |
| CNAG_02899 | predicted protein                     | 6.55688          |
| CNAG_02691 | conserved hypothetical protein        | 6.48458          |
| CNAG_07862 | fumarate reductase                    | 6.38651          |
| CNAG_00679 | conserved hypothetical protein        | 6.26903          |
| CNAG_07765 | bli-3 protein                         | 6.25634          |
| CNAG_05435 | conserved hypothetical protein        | 6.20532          |
| CNAG_04163 | conserved hypothetical protein        | 6.15650          |
| CNAG_02045 | acetoacyl-CoA synthetase              | 6.12459          |
| CNAG_04849 | vacuolar protein                      | 6.11939          |
| CNAG_01116 | beta-ketoacyl reductase               | 6.03514          |
| CNAG_00452 | isovaleryl-CoA dehydrogenase 2        | 6.03329          |
| CNAG_01690 | MFS transporter                       | 6.03051          |
| CNAG_01750 | chaperone                             | 6.02892          |
| CNAG_01751 | conserved hypothetical protein        | 6.02200          |
| CNAG_05785 | conserved hypothetical protein        | 5.96351          |
| CNAG_05303 | isocitrate lyase                      | 5.93642          |
| CNAG_01585 | conserved hypothetical protein        | 5.92315          |
| CNAG_01753 | conserved hypothetical protein        | 5.84335          |
| CNAG_00995 | conserved hypothetical protein        | 5.83510          |
| CNAG_02147 | cytochrome-c peroxidase               | 5.79304          |
| CNAG_02129 | conserved hypothetical protein        | 5.77999          |

|            |                                               |         |
|------------|-----------------------------------------------|---------|
| CNAG_04585 | conserved hypothetical protein                | 5.75276 |
| CNAG_06493 | conserved hypothetical protein                | 5.72425 |
| CNAG_03525 | trehalase                                     | 5.71760 |
| CNAG_03666 | acyl-CoA dehydrogenase                        | 5.65878 |
| CNAG_06431 | acyl-CoA oxidase                              | 5.57608 |
| CNAG_04981 | catalase A                                    | 5.57474 |
| CNAG_04392 | sterol-binding protein                        | 5.49587 |
| CNAG_00588 | conserved hypothetical protein                | 5.46986 |
| CNAG_05167 | conserved hypothetical protein                | 5.44968 |
| CNAG_07347 | heat shock protein                            | 5.44605 |
| CNAG_05662 | sugar transporter                             | 5.43944 |
| CNAG_06396 | hypothetical protein                          | 5.39884 |
| CNAG_02978 | conserved hypothetical protein                | 5.37333 |
| CNAG_02591 | hypothetical protein                          | 5.37171 |
| CNAG_00315 | HHE domain-containing protein                 | 5.32792 |
| CNAG_03010 | enoyl-CoA hydratase/isomerase family protein  | 5.29189 |
| CNAG_02562 | acyl-Coenzyme A dehydrogenase                 | 5.28826 |
| CNAG_03134 | 3-hydroxybutyryl-CoA dehydrogenase            | 5.27757 |
| CNAG_01446 | hypothetical protein                          | 5.26365 |
| CNAG_06800 | conserved hypothetical protein                | 5.24120 |
| CNAG_03142 | conserved hypothetical protein                | 5.20795 |
| CNAG_01680 | methylcrotonoyl-Coenzyme A carboxylase 1      | 5.19129 |
| CNAG_06150 | heat-shock protein 90                         | 5.17807 |
| CNAG_00651 | ATP-binding cassette transporter              | 5.15172 |
| CNAG_04704 | carboxylic acid transport protein             | 5.14612 |
| CNAG_03495 | conserved hypothetical protein                | 5.14496 |
| CNAG_04837 | conserved hypothetical protein                | 5.12371 |
| CNAG_06109 | conserved hypothetical protein                | 5.12135 |
| CNAG_00522 | C2 domain-containing protein                  | 5.11779 |
| CNAG_06577 | conserved hypothetical protein                | 5.08791 |
| CNAG_05938 | conserved hypothetical protein                | 5.06467 |
| CNAG_00490 | acetyl-CoA C-acyltransferase                  | 5.05438 |
| CNAG_02764 | adrenoleukodystrophy protein                  | 5.00063 |
| CNAG_03019 | long-chain-fatty-acid-CoA ligase              | 4.99442 |
| CNAG_02118 | conserved hypothetical protein                | 4.96911 |
| CNAG_03667 | conserved hypothetical protein                | 4.96791 |
| CNAG_05939 | conserved hypothetical protein                | 4.96221 |
| CNAG_06267 | Rds1 protein                                  | 4.95253 |
| CNAG_05381 | myo-inositol transporter 2                    | 4.88511 |
| CNAG_02765 | 3-hydroxyisobutyrate dehydrogenase            | 4.85607 |
| CNAG_03268 | hypothetical protein                          | 4.82175 |
| CNAG_01671 | acetyl/propionyl CoA carboxylase              | 4.80709 |
| CNAG_06576 | allergen                                      | 4.78533 |
| CNAG_02230 | phosphoketolase                               | 4.77869 |
| CNAG_05721 | peroxisomal hydratase-dehydrogenase-epimerase | 4.77717 |
| CNAG_06551 | carnitine O-acetyltransferase                 | 4.77301 |

|            |                                                            |         |
|------------|------------------------------------------------------------|---------|
| CNAG_07755 | conserved hypothetical protein                             | 4.75817 |
| CNAG_02295 | phosphotransferase enzyme family domain-containing protein | 4.68517 |
| CNAG_06668 | mitochondrial protein                                      | 4.67756 |
| CNAG_02288 | succinate:fumarate antiporter                              | 4.66492 |
| CNAG_06628 | aldehyde dehydrogenase                                     | 4.63220 |
| CNAG_03115 | conserved hypothetical protein                             | 4.60947 |
| CNAG_02440 | cation-transporting ATPase                                 | 4.60225 |
| CNAG_07557 | ATP-binding cassette transporter                           | 4.57620 |
| CNAG_01936 | sugar transporter                                          | 4.55853 |
| CNAG_00371 | enoyl-CoA hydratase                                        | 4.55730 |
| CNAG_02674 | dJ347H13.4                                                 | 4.54932 |
| CNAG_04889 | conserved hypothetical protein                             | 4.54724 |
| CNAG_04623 | conserved hypothetical protein                             | 4.54159 |
| CNAG_07528 | conserved hypothetical protein                             | 4.52939 |
| CNAG_07831 | predicted protein                                          | 4.52157 |
| CNAG_07403 | peroxisome biogenesis factor 1                             | 4.51398 |
| CNAG_04274 | acyl-CoA thioesterase                                      | 4.50507 |
| CNAG_06105 | conserved hypothetical protein                             | 4.48282 |
| CNAG_06962 | conserved hypothetical protein                             | 4.45837 |
| CNAG_04217 | phosphoenolpyruvate carboxykinase                          | 4.45828 |
| CNAG_06157 | conserved hypothetical protein                             | 4.45068 |
| CNAG_00751 | conserved hypothetical protein                             | 4.43771 |
| CNAG_04238 | 2,4-dienoyl-CoA reductase                                  | 4.41889 |
| CNAG_07747 | acyl-coenzyme A oxidase I                                  | 4.40814 |
| CNAG_06201 | conserved hypothetical protein                             | 4.37455 |
| CNAG_05229 | stomatin family protein                                    | 4.36605 |
| CNAG_00093 | conserved hypothetical protein                             | 4.31811 |
| CNAG_03688 | conserved hypothetical protein                             | 4.31330 |
| CNAG_03729 | peroxisome targeting sequence binding protein              | 4.30856 |
| CNAG_06433 | AMP binding protein                                        | 4.29486 |
| CNAG_03772 | glucose transporter                                        | 4.28718 |
| CNAG_07367 | amino acid transporter                                     | 4.26467 |
| CNAG_00254 | NADH dehydrogenase                                         | 4.23266 |
| CNAG_03713 | efflux protein EncT                                        | 4.19299 |
| CNAG_05678 | membrane protein                                           | 4.17769 |
| CNAG_03243 | 2-nitropropane dioxygenase                                 | 4.17506 |
| CNAG_02263 | conserved hypothetical protein                             | 4.17028 |
| CNAG_01070 | class II aldolase/adducin family protein                   | 4.16175 |
| CNAG_01558 | zinc-binding dehydrogenase                                 | 4.16157 |
| CNAG_00397 | pyruvate dehydrogenase                                     | 4.15881 |
| CNAG_00834 | phosphatidylserine decarboxylase                           | 4.15682 |
| CNAG_07493 | conserved hypothetical protein                             | 4.15141 |
| CNAG_06827 | conserved hypothetical protein                             | 4.14503 |
| CNAG_06926 | conserved hypothetical protein                             | 4.13201 |
| CNAG_01368 | conserved hypothetical protein                             | 4.11527 |
| CNAG_07802 | class III aminotransferase                                 | 4.11502 |

|            |                                                 |         |
|------------|-------------------------------------------------|---------|
| CNAG_02678 | conserved hypothetical protein                  | 4.10971 |
| CNAG_06209 | hypothetical protein                            | 4.10786 |
| CNAG_01969 | zinc metalloprotease                            | 4.08252 |
| CNAG_00813 | conserved hypothetical protein                  | 4.06478 |
| CNAG_02439 | conserved hypothetical protein                  | 4.06210 |
| CNAG_00488 | conserved hypothetical protein                  | 4.05453 |
| CNAG_04337 | cation diffusion facilitator                    | 4.04658 |
| CNAG_00961 | conserved hypothetical protein                  | 4.02791 |
| CNAG_04890 | conserved hypothetical protein                  | 4.01275 |
| CNAG_05658 | L-arabinitol 4-dehydrogenase                    | 3.99833 |
| CNAG_00984 | glucose and ribitol dehydrogenase protein       | 3.99434 |
| CNAG_03518 | PadA2                                           | 3.99138 |
| CNAG_03067 | pyruvate carboxyltransferase                    | 3.97670 |
| CNAG_07308 | conserved hypothetical protein                  | 3.96886 |
| CNAG_06999 | conserved hypothetical protein                  | 3.96488 |
| CNAG_06302 | PEP2                                            | 3.95105 |
| CNAG_07043 | conserved hypothetical protein                  | 3.94354 |
| CNAG_05644 | 2-nitropropane dioxygenase                      | 3.93649 |
| CNAG_03572 | opsin 1                                         | 3.93541 |
| CNAG_03347 | chaperone                                       | 3.93091 |
| CNAG_01727 | Hsc70-4                                         | 3.90297 |
| CNAG_04416 | major facilitator superfamily transporter       | 3.89975 |
| CNAG_02438 | conserved hypothetical protein                  | 3.88994 |
| CNAG_04106 | conserved hypothetical protein                  | 3.88003 |
| CNAG_05119 | GabA permease                                   | 3.87867 |
| CNAG_00172 | kinesin                                         | 3.86371 |
| CNAG_03113 | trehalose synthase                              | 3.85743 |
| CNAG_03394 | conserved hypothetical protein                  | 3.84610 |
| CNAG_00597 | amino acid transporter                          | 3.81365 |
| CNAG_04937 | conserved hypothetical protein                  | 3.79966 |
| CNAG_05913 | alpha-glucosidase                               | 3.77892 |
| CNAG_03794 | endoplasmic reticulum protein                   | 3.77356 |
| CNAG_01341 | mannose-6-phosphate isomerase                   | 3.77028 |
| CNAG_03002 | conserved hypothetical protein                  | 3.76714 |
| CNAG_04374 | conserved hypothetical protein                  | 3.74275 |
| CNAG_01743 | conserved hypothetical protein                  | 3.72261 |
| CNAG_05653 | malate synthase                                 | 3.72239 |
| CNAG_05304 | predicted protein                               | 3.70736 |
| CNAG_03128 | lincomycin-condensing protein lmbA              | 3.68472 |
| CNAG_04186 | conserved hypothetical protein                  | 3.67086 |
| CNAG_02877 | conserved hypothetical protein                  | 3.64507 |
| CNAG_01417 | conserved hypothetical protein                  | 3.61690 |
| CNAG_02254 | quininate permease                              | 3.60585 |
| CNAG_04345 | specific RNA polymerase II transcription factor | 3.60170 |
| CNAG_06932 | sugar transporter                               | 3.60168 |
| CNAG_04415 | oxidoreductase                                  | 3.59355 |

|            |                                               |         |
|------------|-----------------------------------------------|---------|
| CNAG_03059 | conserved hypothetical protein                | 3.59222 |
| CNAG_07492 | conserved hypothetical protein                | 3.59061 |
| CNAG_03910 | D-xylose-proton symporter                     | 3.58648 |
| CNAG_01847 | conserved hypothetical protein                | 3.58352 |
| CNAG_04096 | racemase                                      | 3.58267 |
| CNAG_04210 | sugar transporter                             | 3.57663 |
| CNAG_06574 | antiphagocytic protein 1                      | 3.57116 |
| CNAG_04970 | conserved hypothetical protein                | 3.57021 |
| CNAG_05169 | cytochrome b2                                 | 3.54444 |
| CNAG_02874 | conserved hypothetical protein                | 3.54017 |
| CNAG_07486 | conserved hypothetical protein                | 3.52279 |
| CNAG_06106 | chaperone regulator                           | 3.52160 |
| CNAG_02933 | quinone oxidoreductase                        | 3.52098 |
| CNAG_05932 | peptidyl-prolyl cis-trans isomerase D         | 3.51894 |
| CNAG_04314 | NAD+ kinase                                   | 3.51637 |
| CNAG_03782 | conserved hypothetical protein                | 3.51440 |
| CNAG_05991 | glycosyl hydrolase family 88                  | 3.50966 |
| CNAG_06583 | conserved hypothetical protein                | 3.50437 |
| CNAG_04795 | adenine nucleotide transporter                | 3.48019 |
| CNAG_03114 | conserved hypothetical protein                | 3.45793 |
| CNAG_03083 | cupin domain-containing protein               | 3.45259 |
| CNAG_04308 | short chain 3-hydroxyacyl-CoA dehydrogenase   | 3.44063 |
| CNAG_07832 | predicted protein                             | 3.43916 |
| CNAG_05994 | multidrug transporter                         | 3.43351 |
| CNAG_05867 | L-fucose transporter                          | 3.43043 |
| CNAG_03597 | conserved hypothetical protein                | 3.42653 |
| CNAG_04735 | extracellular elastinolytic metalloproteinase | 3.42336 |
| CNAG_02690 | pirin                                         | 3.40136 |
| CNAG_03461 | hypothetical protein                          | 3.39714 |
| CNAG_04129 | conserved hypothetical protein                | 3.38537 |
| CNAG_00851 | conserved hypothetical protein                | 3.38525 |
| CNAG_05042 | carnitine acetyltransferase                   | 3.37488 |
| CNAG_06292 | sugar transporter                             | 3.37194 |
| CNAG_07944 | allophanate hydrolase subunit 2               | 3.36584 |
| CNAG_04626 | conserved hypothetical protein                | 3.36420 |
| CNAG_01102 | oxidoreductase                                | 3.35701 |
| CNAG_00529 | sulfite transporter                           | 3.34730 |
| CNAG_05436 | conserved hypothetical protein                | 3.34218 |
| CNAG_04394 | conserved hypothetical protein                | 3.33382 |
| CNAG_01865 | conserved hypothetical protein                | 3.31385 |
| CNAG_06935 | isochorismatase hydrolase                     | 3.30694 |
| CNAG_04085 | oxidoreductase                                | 3.30452 |
| CNAG_00979 | copper uptake transporter                     | 3.30091 |
| CNAG_05067 | conserved hypothetical protein                | 3.29690 |
| CNAG_06868 | enolase 1                                     | 3.29678 |
| CNAG_00598 | nicotinamide mononucleotide permease          | 3.29017 |

|            |                                           |         |
|------------|-------------------------------------------|---------|
| CNAG_06169 | R,R                                       | 3.28614 |
| CNAG_01758 | polygalacturonase                         | 3.28612 |
| CNAG_00537 | carnitine acetyltransferase               | 3.28581 |
| CNAG_03775 | conserved hypothetical protein            | 3.27918 |
| CNAG_05178 | conserved hypothetical protein            | 3.27684 |
| CNAG_00484 | puruvate dehydrogenase complex            | 3.27661 |
| CNAG_01252 | thiosulfate sulfurtransferase             | 3.26172 |
| CNAG_07026 | conserved hypothetical protein            | 3.25743 |
| CNAG_04455 | peroxisomal protein                       | 3.25634 |
| CNAG_05313 | conserved hypothetical protein            | 3.25398 |
| CNAG_05675 | mitochondrial protein                     | 3.25059 |
| CNAG_06871 | conserved hypothetical protein            | 3.24304 |
| CNAG_04459 | hypothetical protein                      | 3.23979 |
| CNAG_06879 | conserved hypothetical protein            | 3.21252 |
| CNAG_05310 | nipsnap family protein                    | 3.20190 |
| CNAG_00686 | conserved hypothetical protein            | 3.20107 |
| CNAG_04979 | conserved hypothetical protein            | 3.19721 |
| CNAG_06024 | peroxin 14                                | 3.19666 |
| CNAG_01954 | aldo/keto reductase                       | 3.19186 |
| CNAG_01075 | methylmalonate-semialdehyde dehydrogenase | 3.18636 |
| CNAG_03408 | conserved hypothetical protein            | 3.18181 |
| CNAG_01338 | DNA repair protein rhp42                  | 3.18046 |
| CNAG_00336 | conserved hypothetical protein            | 3.17973 |
| CNAG_02943 | cytoplasmic protein                       | 3.17642 |
| CNAG_01359 | RNA polymerase II subunit 7               | 3.17553 |
| CNAG_01686 | ThiJ/Pfpl                                 | 3.17437 |
| CNAG_01138 | cytochrome c peroxidase                   | 3.17086 |
| CNAG_06653 | hypothetical protein                      | 3.14991 |
| CNAG_03511 | conserved hypothetical protein            | 3.14936 |
| CNAG_03233 | conserved hypothetical protein            | 3.14612 |
| CNAG_04174 | peroxisome assembly factor-2              | 3.11395 |
| CNAG_01386 | conserved hypothetical protein            | 3.10550 |
| CNAG_06229 | conserved hypothetical protein            | 3.09882 |
| CNAG_05325 | conserved hypothetical protein            | 3.09424 |
| CNAG_01031 | conserved hypothetical protein            | 3.09377 |
| CNAG_07319 | conserved hypothetical protein            | 3.08325 |
| CNAG_04737 | DUF323 domain-containing protein          | 3.08134 |
| CNAG_03519 | cytoplasmic protein                       | 3.07856 |
| CNAG_06602 | cysteine-type peptidase                   | 3.07723 |
| CNAG_04409 | conserved hypothetical protein            | 3.07018 |
| CNAG_04621 | glycogen synthase                         | 3.06350 |
| CNAG_01689 | conserved hypothetical protein            | 3.06321 |
| CNAG_06515 | UPF0271 protein                           | 3.06278 |
| CNAG_01584 | hydrolase                                 | 3.05665 |
| CNAG_01387 | conserved hypothetical protein            | 3.04703 |
| CNAG_02335 | UPF0364 protein                           | 3.04674 |

|            |                                                               |         |
|------------|---------------------------------------------------------------|---------|
| CNAG_07596 | predicted protein                                             | 3.04527 |
| CNAG_03728 | conserved hypothetical protein                                | 3.04268 |
| CNAG_07645 | predicted protein                                             | 3.03177 |
| CNAG_04736 | conserved hypothetical protein                                | 3.02823 |
| CNAG_05094 | predicted protein                                             | 3.02723 |
| CNAG_03050 | conserved hypothetical protein                                | 3.02446 |
| CNAG_00827 | ribose 5-phosphate isomerase                                  | 3.02397 |
| CNAG_02006 | deamidase                                                     | 3.01898 |
| CNAG_05499 | conserved hypothetical protein                                | 3.00594 |
| CNAG_06355 | conserved hypothetical protein                                | 3.00230 |
| CNAG_03076 | predicted protein                                             | 2.99971 |
| CNAG_05685 | neutral amino acid transporter                                | 2.99570 |
| CNAG_03036 | potassium ion transporter                                     | 2.99124 |
| CNAG_03563 | aspartate-tRNA ligase                                         | 2.97919 |
| CNAG_02226 | conserved hypothetical protein                                | 2.97427 |
| CNAG_05300 | mitochondrial carrier protein                                 | 2.96721 |
| CNAG_07341 | conserved hypothetical protein                                | 2.95551 |
| CNAG_05676 | tyrosine aminotransferase                                     | 2.94308 |
| CNAG_02170 | conserved hypothetical protein                                | 2.94072 |
| CNAG_06698 | phosphatase                                                   | 2.93844 |
| CNAG_03630 | conserved hypothetical protein                                | 2.93732 |
| CNAG_05115 | sarcosine oxidase                                             | 2.93149 |
| CNAG_05383 | conserved hypothetical protein                                | 2.92747 |
| CNAG_04402 | splicing factor                                               | 2.92596 |
| CNAG_04275 | metalloendopeptidase                                          | 2.92497 |
| CNAG_01185 | hsp70-like protein                                            | 2.91802 |
| CNAG_00305 | chaperone activator                                           | 2.91166 |
| CNAG_00848 | conserved hypothetical protein                                | 2.91059 |
| CNAG_00054 | DUF1264 domain-containing protein                             | 2.89702 |
| CNAG_06247 | conserved hypothetical protein                                | 2.89526 |
| CNAG_01695 | conserved hypothetical protein                                | 2.89473 |
| CNAG_05871 | conserved hypothetical protein                                | 2.89239 |
| CNAG_02284 | branched-chain alpha-keto acid dehydrogenase E1-alpha subunit | 2.88850 |
| CNAG_04351 | methilmalonate-semialdehyde dehydrogenase                     | 2.88638 |
| CNAG_00738 | conserved hypothetical protein                                | 2.88629 |
| CNAG_02044 | conserved hypothetical protein                                | 2.87112 |
| CNAG_06213 | conserved hypothetical protein                                | 2.86909 |
| CNAG_01383 | conserved hypothetical protein                                | 2.86494 |
| CNAG_05686 | hypothetical protein                                          | 2.85308 |
| CNAG_01493 | conserved hypothetical protein                                | 2.85213 |
| CNAG_03771 | DNA binding protein Ncp1                                      | 2.84623 |
| CNAG_05324 | sugar transporter                                             | 2.84145 |
| CNAG_02934 | conserved hypothetical protein                                | 2.84139 |
| CNAG_02449 | long-chain-fatty-acid-CoA ligase                              | 2.84024 |
| CNAG_02417 | lipase/esterase family protein                                | 2.83863 |
| CNAG_05095 | putativepod-specific dehydrogenase SAC25                      | 2.83612 |

|            |                                                       |         |
|------------|-------------------------------------------------------|---------|
| CNAG_03562 | D-amino-acid oxidase                                  | 2.83596 |
| CNAG_06066 | nucleoside-diphosphate-sugar epimerase family protein | 2.83115 |
| CNAG_00036 | Sec14 cytosolic factor                                | 2.82552 |
| CNAG_01588 | hypothetical protein                                  | 2.82465 |
| CNAG_05168 | conserved hypothetical protein                        | 2.82387 |
| CNAG_03393 | acyl-CoA thiolesterase                                | 2.81458 |
| CNAG_01007 | C2 domain-containing protein                          | 2.81201 |
| CNAG_02500 | calnexin                                              | 2.81133 |
| CNAG_00543 | conserved hypothetical protein                        | 2.80411 |
| CNAG_06816 | FCY1                                                  | 2.80386 |
| CNAG_02872 | conserved hypothetical protein                        | 2.80119 |
| CNAG_03564 | conserved hypothetical protein                        | 2.79053 |
| CNAG_01348 | conserved hypothetical protein                        | 2.78831 |
| CNAG_03179 | conserved hypothetical protein                        | 2.78574 |
| CNAG_06836 | oxidoreductase                                        | 2.77786 |
| CNAG_00462 | oxidoreductase                                        | 2.77370 |
| CNAG_04324 | Atg22B-1p                                             | 2.76907 |
| CNAG_03446 | conserved hypothetical protein                        | 2.76858 |
| CNAG_04185 | conserved hypothetical protein                        | 2.75394 |
| CNAG_06931 | beta-glucosidase                                      | 2.75364 |
| CNAG_01934 | predicted protein                                     | 2.75046 |
| CNAG_02069 | conserved hypothetical protein                        | 2.74547 |
| CNAG_02023 | conserved hypothetical protein                        | 2.73388 |
| CNAG_04947 | high-affinity nicotinic acid transporter              | 2.72896 |
| CNAG_01479 | conserved hypothetical protein                        | 2.71240 |
| CNAG_01481 | conserved hypothetical protein                        | 2.70406 |
| CNAG_02682 | MSH1 protein                                          | 2.69908 |
| CNAG_03881 | conserved hypothetical protein                        | 2.69391 |
| CNAG_05031 | succinyl-CoA:3-ketoacid-coenzyme A transferase        | 2.69345 |
| CNAG_00132 | conserved hypothetical protein                        | 2.69006 |
| CNAG_02526 | conserved hypothetical protein                        | 2.68714 |
| CNAG_06029 | conserved hypothetical protein                        | 2.68389 |
| CNAG_03522 | conserved hypothetical protein                        | 2.67235 |
| CNAG_07641 | monosaccharide transporter                            | 2.67200 |
| CNAG_05587 | conserved hypothetical protein                        | 2.65851 |
| CNAG_05843 | translation initiation factor eIF-4E                  | 2.64332 |
| CNAG_01082 | conserved hypothetical protein                        | 2.64191 |
| CNAG_03698 | zinc finger protein Mlo2                              | 2.63735 |
| CNAG_02448 | predicted protein                                     | 2.62923 |
| CNAG_05338 | conserved hypothetical protein                        | 2.62379 |
| CNAG_01696 | DNAj protein                                          | 2.62329 |
| CNAG_07551 | conserved hypothetical protein                        | 2.61639 |
| CNAG_04934 | conserved hypothetical protein                        | 2.61145 |
| CNAG_06208 | heat shock protein                                    | 2.61037 |
| CNAG_02728 | peroxisomal membrane protein pex13                    | 2.60844 |
| CNAG_05654 | conserved hypothetical protein                        | 2.60470 |



|            |                                                |         |
|------------|------------------------------------------------|---------|
| CNAG_06296 | conserved hypothetical protein                 | 2.59870 |
| CNAG_03304 | conserved hypothetical protein                 | 2.59805 |
| CNAG_06186 | DUF895 domain membrane protein                 | 2.58240 |
| CNAG_05657 | cytoplasmic protein                            | 2.57800 |
| CNAG_02429 | conserved hypothetical protein                 | 2.57767 |
| CNAG_04322 | conserved hypothetical protein                 | 2.57113 |
| CNAG_03991 | integral membrane protein                      | 2.56965 |
| CNAG_06309 | hypothetical protein                           | 2.56682 |
| CNAG_00177 | conserved hypothetical protein                 | 2.56666 |
| CNAG_01735 | conserved hypothetical protein                 | 2.56515 |
| CNAG_03727 | conserved hypothetical protein                 | 2.56455 |
| CNAG_02169 | conserved hypothetical protein                 | 2.55512 |
| CNAG_04209 | voltage-gated potassium channel beta-2 subunit | 2.55104 |
| CNAG_00161 | auxin-induced protein                          | 2.54794 |
| CNAG_00096 | conserved hypothetical protein                 | 2.54179 |
| CNAG_05937 | conserved hypothetical protein                 | 2.53885 |
| CNAG_01764 | cytoplasmic protein                            | 2.53837 |
| CNAG_00131 | alcohol dehydrogenase                          | 2.53110 |
| CNAG_01926 | peroxisome targeting signal receptor           | 2.52793 |
| CNAG_05350 | conserved hypothetical protein                 | 2.52443 |
| CNAG_00251 | conserved hypothetical protein                 | 2.51859 |
| CNAG_04112 | oxidoreductase                                 | 2.51269 |
| CNAG_02058 | hypothetical protein                           | 2.50347 |
| CNAG_07768 | predicted protein                              | 2.50124 |
| CNAG_07826 | hypothetical protein                           | 2.49467 |
| CNAG_05870 | conserved hypothetical protein                 | 2.49428 |
| CNAG_00654 | conserved hypothetical protein                 | 2.48975 |
| CNAG_04401 | vesicular-fusion protein                       | 2.48919 |
| CNAG_00840 | conserved hypothetical protein                 | 2.48819 |
| CNAG_01633 | conserved hypothetical protein                 | 2.48548 |
| CNAG_02398 | conserved hypothetical protein                 | 2.48255 |
| CNAG_01074 | neutral amino acid transporter                 | 2.48048 |
| CNAG_03894 | conserved hypothetical protein                 | 2.47336 |
| CNAG_02427 | conserved hypothetical protein                 | 2.47138 |
| CNAG_01983 | cAMP-independent regulatory protein            | 2.46181 |
| CNAG_00107 | conserved hypothetical protein                 | 2.45897 |
| CNAG_05299 | oxidoreductase                                 | 2.45846 |
| CNAG_04938 | conserved hypothetical protein                 | 2.45775 |
| CNAG_06527 | trehalose transporter                          | 2.45756 |
| CNAG_05599 | conserved hypothetical protein                 | 2.45479 |
| CNAG_00149 | conserved hypothetical protein                 | 2.45462 |
| CNAG_07775 | conserved hypothetical protein                 | 2.45336 |
| CNAG_04519 | D-serine dehydratase                           | 2.45300 |
| CNAG_02013 | conserved hypothetical protein                 | 2.45190 |
| CNAG_06942 | nicotinamide mononucleotide permease           | 2.44607 |
| CNAG_01942 | hypothetical protein                           | 2.44149 |

|            |                                           |         |
|------------|-------------------------------------------|---------|
| CNAG_07348 | phosphopantothenoylcysteine decarboxylase | 2.43752 |
| CNAG_07703 | conserved hypothetical protein            | 2.43701 |
| CNAG_02553 | short-chain dehydrogenase                 | 2.43690 |
| CNAG_00162 | alternative oxidase                       | 2.43618 |
| CNAG_04122 | galactose dehydrogenase                   | 2.43061 |
| CNAG_04403 | CCCH zinc finger protein                  | 2.42967 |
| CNAG_01794 | 2-hydroxyacid dehydrogenase               | 2.42798 |
| CNAG_04886 | conserved hypothetical protein            | 2.42581 |
| CNAG_07776 | pseudouridylate synthase                  | 2.41449 |
| CNAG_03705 | conserved hypothetical protein            | 2.41355 |
| CNAG_03692 | DUF1295 domain-containing protein         | 2.41108 |
| CNAG_01553 | CORD and CS domain-containing protein     | 2.40794 |
| CNAG_01085 | conserved hypothetical protein            | 2.40646 |
| CNAG_02595 | conserved hypothetical protein            | 2.40358 |
| CNAG_04090 | activating transcription factor 2         | 2.40064 |
| CNAG_01835 | receptor                                  | 2.40059 |
| CNAG_07796 | uroporphyrin-III C-methyltransferase      | 2.40027 |
| CNAG_07603 | conserved hypothetical protein            | 2.39771 |
| CNAG_00360 | nuclear protein SNF4                      | 2.39335 |
| CNAG_07742 | predicted protein                         | 2.39226 |
| CNAG_07708 | conserved hypothetical protein            | 2.38857 |
| CNAG_03145 | predicted protein                         | 2.38791 |
| CNAG_03668 | conserved hypothetical protein            | 2.38705 |
| CNAG_04902 | MMS2                                      | 2.38604 |
| CNAG_06949 | hypothetical protein                      | 2.38444 |
| CNAG_00374 | conserved hypothetical protein            | 2.37998 |
| CNAG_04067 | conserved hypothetical protein            | 2.36944 |
| CNAG_01307 | endoplasmic reticulum protein             | 2.36830 |
| CNAG_02168 | glucoamylase s1/s2                        | 2.36588 |
| CNAG_05177 | DNA-directed polymerase kappa             | 2.36528 |
| CNAG_05993 | transmembrane transporter Liz1p           | 2.36405 |
| CNAG_02939 | Pex3p                                     | 2.36260 |
| CNAG_04903 | conserved hypothetical protein            | 2.36256 |
| CNAG_05861 | conserved hypothetical protein            | 2.36211 |
| CNAG_04076 | predicted protein                         | 2.35709 |
| CNAG_06732 | conserved hypothetical protein            | 2.35265 |
| CNAG_05134 | ornithine-oxo-acid transaminase           | 2.33954 |
| CNAG_00524 | acetyl-Coenzyme A acyltransferase 2       | 2.33770 |
| CNAG_05665 | conserved hypothetical protein            | 2.32589 |
| CNAG_07512 | conserved hypothetical protein            | 2.32287 |
| CNAG_04869 | carboxylesterases                         | 2.32142 |
| CNAG_02727 | conserved hypothetical protein            | 2.32016 |
| CNAG_00100 | chaperone                                 | 2.31891 |
| CNAG_00465 | conserved hypothetical protein            | 2.31645 |
| CNAG_04291 | glycosyl-hydrolase                        | 2.31487 |
| CNAG_07683 | conserved hypothetical protein            | 2.31293 |

|            |                                                 |         |
|------------|-------------------------------------------------|---------|
| CNAG_01763 | cytoplasmic protein                             | 2.30834 |
| CNAG_05281 | predicted protein                               | 2.30505 |
| CNAG_06121 | conserved hypothetical protein                  | 2.29587 |
| CNAG_00575 | catalase 3                                      | 2.29312 |
| CNAG_07602 | conserved hypothetical protein                  | 2.29114 |
| CNAG_00171 | peroxisome assembly protein                     | 2.28976 |
| CNAG_07727 | predicted protein                               | 2.28645 |
| CNAG_06448 | cystathionine gamma-lyase                       | 2.28586 |
| CNAG_04086 | conserved hypothetical protein                  | 2.28558 |
| CNAG_06791 | conserved hypothetical protein                  | 2.28506 |
| CNAG_06565 | conserved hypothetical protein                  | 2.28367 |
| CNAG_06497 | microsomal epoxide hydrolase                    | 2.28091 |
| CNAG_05774 | conserved hypothetical protein                  | 2.27879 |
| CNAG_00936 | lipid particle protein                          | 2.27585 |
| CNAG_03859 | transcriptional regulator Medusa                | 2.27560 |
| CNAG_07766 | DNA polymerase lambda                           | 2.27189 |
| CNAG_06807 | conserved hypothetical protein                  | 2.26951 |
| CNAG_06973 | conserved hypothetical protein                  | 2.26880 |
| CNAG_01776 | HpcH/Hpal aldolase/citrate lyase family protein | 2.26513 |
| CNAG_05021 | conserved hypothetical protein                  | 2.26248 |
| CNAG_04751 | conserved hypothetical protein                  | 2.25447 |
| CNAG_06028 | conserved hypothetical protein                  | 2.25414 |
| CNAG_03841 | conserved hypothetical protein                  | 2.25401 |
| CNAG_01601 | lipase                                          | 2.24773 |
| CNAG_02017 | predicted protein                               | 2.24637 |
| CNAG_03242 | peroxisomal membrane protein                    | 2.24614 |
| CNAG_00729 | conserved hypothetical protein                  | 2.24410 |
| CNAG_06216 | conserved hypothetical protein                  | 2.24077 |
| CNAG_01675 | tagatose-bisphosphate aldolase                  | 2.23961 |
| CNAG_07691 | hypothetical protein                            | 2.23664 |
| CNAG_00499 | carnitine/acyl carnitine carrier                | 2.23379 |
| CNAG_07357 | conserved hypothetical protein                  | 2.23036 |
| CNAG_00735 | succinate-semialdehyde dehydrogenase            | 2.22161 |
| CNAG_04625 | serine-type endopeptidase                       | 2.21796 |
| CNAG_01193 | conserved hypothetical protein                  | 2.21656 |
| CNAG_01672 | RAS1                                            | 2.21366 |
| CNAG_03738 | pantetheine-phosphate adenyllyltransferase      | 2.21232 |
| CNAG_01524 | conserved hypothetical protein                  | 2.21151 |
| CNAG_04879 | glycogen debranching enzyme                     | 2.21071 |
| CNAG_04228 | 2,4-dienoyl-CoA reductase                       | 2.20561 |
| CNAG_04690 | mitochondrial protein                           | 2.20454 |
| CNAG_00855 | ligase                                          | 2.19549 |
| CNAG_05656 | conserved hypothetical protein                  | 2.19382 |
| CNAG_05500 | conserved hypothetical protein                  | 2.19084 |
| CNAG_01194 | conserved hypothetical protein                  | 2.19039 |
| CNAG_04531 | enoyl-CoA hydratase                             | 2.18975 |

|            |                                                |         |
|------------|------------------------------------------------|---------|
| CNAG_00075 | conserved hypothetical protein                 | 2.18735 |
| CNAG_02407 | phospholipase D                                | 2.17516 |
| CNAG_07718 | multidomain RhoGEF                             | 2.17176 |
| CNAG_07558 | wos2 protein                                   | 2.17074 |
| CNAG_07538 | calcium ion transporter                        | 2.16626 |
| CNAG_01960 | efflux protein EncT                            | 2.15516 |
| CNAG_01742 | water channel                                  | 2.15498 |
| CNAG_03046 | conserved hypothetical protein                 | 2.15357 |
| CNAG_06843 | predicted protein                              | 2.15308 |
| CNAG_03346 | conserved hypothetical protein                 | 2.15290 |
| CNAG_01872 | copper ion transporter                         | 2.15090 |
| CNAG_00163 | conserved hypothetical protein                 | 2.15038 |
| CNAG_01542 | taurine catabolism dioxygenase TauD            | 2.14766 |
| CNAG_03825 | conserved hypothetical protein                 | 2.14676 |
| CNAG_02066 | conserved hypothetical protein                 | 2.14646 |
| CNAG_05971 | hypothetical protein                           | 2.14312 |
| CNAG_01041 | conserved hypothetical protein                 | 2.14167 |
| CNAG_05266 | membrane protein                               | 2.13746 |
| CNAG_03490 | conserved hypothetical protein                 | 2.13679 |
| CNAG_05114 | peroxisomal copper amine oxidase               | 2.13496 |
| CNAG_04333 | conserved hypothetical protein                 | 2.13483 |
| CNAG_03526 | conserved hypothetical protein                 | 2.13388 |
| CNAG_01796 | conserved hypothetical protein                 | 2.13165 |
| CNAG_04070 | exonuclease                                    | 2.13026 |
| CNAG_05766 | endoglucanase C                                | 2.12259 |
| CNAG_03697 | hormone-sensitive lipase                       | 2.11703 |
| CNAG_04034 | conserved hypothetical protein                 | 2.11677 |
| CNAG_01384 | bodown198                                      | 2.11592 |
| CNAG_03558 | predicted protein                              | 2.11568 |
| CNAG_01086 | conserved hypothetical protein                 | 2.11215 |
| CNAG_07702 | conserved hypothetical protein                 | 2.10836 |
| CNAG_01892 | conserved hypothetical protein                 | 2.10624 |
| CNAG_02873 | signal peptidase I                             | 2.10504 |
| CNAG_06712 | hypothetical protein                           | 2.10442 |
| CNAG_07942 | cell division control protein 25               | 2.10260 |
| CNAG_07933 | hypothetical protein                           | 2.10246 |
| CNAG_07421 | conserved hypothetical protein                 | 2.09830 |
| CNAG_00393 | 1,4-alpha-glucan-branching enzyme              | 2.09050 |
| CNAG_00376 | conserved hypothetical protein                 | 2.09018 |
| CNAG_07552 | DNA repair protein rad8                        | 2.08942 |
| CNAG_03455 | conserved hypothetical protein                 | 2.08178 |
| CNAG_06011 | conserved hypothetical protein                 | 2.08123 |
| CNAG_03783 | predicted protein                              | 2.08060 |
| CNAG_03599 | mandelate racemase/muconate lactonizing enzyme | 2.08016 |
| CNAG_05891 | conserved hypothetical protein                 | 2.07872 |
| CNAG_02550 | conserved hypothetical protein                 | 2.07703 |

|            |                                          |         |
|------------|------------------------------------------|---------|
| CNAG_05321 | transposase subfamily                    | 2.07306 |
| CNAG_00826 | glycerone kinase                         | 2.07160 |
| CNAG_02323 | conserved hypothetical protein           | 2.07081 |
| CNAG_00403 | mitochondrial protein                    | 2.06858 |
| CNAG_07767 | conserved hypothetical protein           | 2.06827 |
| CNAG_05652 | cytoplasmic protein                      | 2.06672 |
| CNAG_02219 | conserved hypothetical protein           | 2.06275 |
| CNAG_03992 | GTP-binding protein 1                    | 2.06257 |
| CNAG_03377 | conserved hypothetical protein           | 2.06248 |
| CNAG_02165 | cytoplasmic protein                      | 2.06237 |
| CNAG_03241 | conserved hypothetical protein           | 2.06225 |
| CNAG_03290 | STE/STE20/YSK protein kinase             | 2.06175 |
| CNAG_04307 | uricase                                  | 2.04850 |
| CNAG_07361 | conserved hypothetical protein           | 2.04630 |
| CNAG_03492 | conserved hypothetical protein           | 2.04621 |
| CNAG_09003 | small ribosomal protein subunit 3        | 2.04584 |
| CNAG_03944 | chaperone regulator                      | 2.04402 |
| CNAG_05601 | calpain-like protease palB/RIM13         | 2.04016 |
| CNAG_06511 | conserved hypothetical protein           | 2.03569 |
| CNAG_01314 | vacuolar protein                         | 2.03250 |
| CNAG_06907 | conserved hypothetical protein           | 2.03136 |
| CNAG_06531 | conserved hypothetical protein           | 2.03053 |
| CNAG_02924 | histone H1                               | 2.02725 |
| CNAG_07644 | predicted protein                        | 2.02551 |
| CNAG_04495 | conserved hypothetical protein           | 2.02449 |
| CNAG_05320 | oxidoreductase family protein            | 2.02282 |
| CNAG_00028 | high-affinity nicotinic acid transporter | 2.02115 |
| CNAG_07434 | conserved hypothetical protein           | 2.02031 |
| CNAG_00531 | ENA P-type ATPase 1                      | 2.01803 |
| CNAG_04698 | cytoplasmic protein                      | 2.01426 |
| CNAG_00521 | conserved hypothetical protein           | 2.01300 |
| CNAG_03133 | UDP-glucose,sterol transferase           | 2.01236 |
| CNAG_06507 | conserved hypothetical protein           | 2.01096 |
| CNAG_04718 | conserved hypothetical protein           | 2.01095 |
| CNAG_01476 | conserved hypothetical protein           | 2.00774 |
| CNAG_01234 | spore wall assembly-related protein      | 2.00727 |
| CNAG_06399 | SH# domain-containing protein            | 2.00159 |
| CNAG_06134 | conserved hypothetical protein           | 1.99901 |
| CNAG_01725 | predicted protein                        | 1.99577 |
| CNAG_02070 | conserved hypothetical protein           | 1.99474 |
| CNAG_02692 | nitroreductase family protein            | 1.99327 |
| CNAG_00130 | CAMK/CAMK1 protein kinase                | 1.99321 |
| CNAG_07676 | ATP-dependent RNA helicase DBP2-A        | 1.99288 |
| CNAG_07654 | conserved hypothetical protein           | 1.98797 |
| CNAG_00526 | conserved hypothetical protein           | 1.98562 |
| CNAG_05643 | conserved hypothetical protein           | 1.98357 |

|            |                                                     |         |
|------------|-----------------------------------------------------|---------|
| CNAG_06578 | conserved hypothetical protein                      | 1.98321 |
| CNAG_03294 | conserved hypothetical protein                      | 1.98236 |
| CNAG_06010 | fatty aldehyde dehydrogenase                        | 1.98216 |
| CNAG_04724 | Ube3c protein                                       | 1.97873 |
| CNAG_03445 | conserved hypothetical protein                      | 1.97766 |
| CNAG_03685 | conserved hypothetical protein                      | 1.97697 |
| CNAG_02465 | allantoate permease                                 | 1.97674 |
| CNAG_01977 | predicted protein                                   | 1.97669 |
| CNAG_02047 | conserved hypothetical protein                      | 1.97482 |
| CNAG_01076 | 4-aminobutyrate transaminase                        | 1.97191 |
| CNAG_04386 | conserved hypothetical protein                      | 1.96704 |
| CNAG_06286 | conserved hypothetical protein                      | 1.96553 |
| CNAG_01982 | conserved hypothetical protein                      | 1.96372 |
| CNAG_02584 | serine/threonine-protein phosphatase 2A activator 1 | 1.96182 |
| CNAG_04346 | dihydrodipicolinate synthase                        | 1.96117 |
| CNAG_04208 | machado-Joseph disease protein 1                    | 1.95789 |
| CNAG_05916 | conserved hypothetical protein                      | 1.95691 |
| CNAG_05929 | MFS maltose permease MalP                           | 1.95406 |
| CNAG_04611 | ubiquitin-protein ligase                            | 1.94990 |
| CNAG_03913 | conserved hypothetical protein                      | 1.94870 |
| CNAG_04898 | MFS transporter                                     | 1.94583 |
| CNAG_00047 | kinase                                              | 1.94569 |
| CNAG_05914 | MFS maltose permease MalP                           | 1.94494 |
| CNAG_03790 | conserved hypothetical protein                      | 1.94200 |
| CNAG_04195 | O-methyltransferase                                 | 1.93990 |
| CNAG_02355 | UDP-N-acetylglucosamine transporter                 | 1.93697 |
| CNAG_00055 | conserved hypothetical protein                      | 1.93480 |
| CNAG_05847 | thioredoxin-disulfide reductase                     | 1.93225 |
| CNAG_06539 | monocarboxylic acid transporter                     | 1.93160 |
| CNAG_03937 | predicted protein                                   | 1.92992 |
| CNAG_07586 | conserved hypothetical protein                      | 1.92827 |
| CNAG_02699 | conserved hypothetical protein                      | 1.92812 |
| CNAG_00745 | other/HAL protein kinase                            | 1.92139 |
| CNAG_06035 | alcohol dehydrogenase                               | 1.91933 |
| CNAG_02499 | predicted protein                                   | 1.91875 |
| CNAG_07743 | predicted protein                                   | 1.91845 |
| CNAG_02603 | early growth response protein 1                     | 1.91591 |
| CNAG_04362 | ATP-dependent RNA helicase DBP5                     | 1.91348 |
| CNAG_03679 | conserved hypothetical protein                      | 1.91185 |
| CNAG_00001 | conserved hypothetical protein                      | 1.91028 |
| CNAG_02903 | zinc-type alcohol dehydrogenase                     | 1.91012 |
| CNAG_06499 | Ppapdc1 protein                                     | 1.90986 |
| CNAG_01925 | conserved hypothetical protein                      | 1.90976 |
| CNAG_06938 | conserved hypothetical protein                      | 1.90845 |
| CNAG_07482 | conserved hypothetical protein                      | 1.90696 |
| CNAG_04193 | conserved hypothetical protein                      | 1.90609 |

|            |                                              |         |
|------------|----------------------------------------------|---------|
| CNAG_00057 | fructose-bisphosphatase                      | 1.90602 |
| CNAG_01555 | conserved hypothetical protein               | 1.90191 |
| CNAG_03060 | multiple drug resistance protein             | 1.90109 |
| CNAG_00883 | transcription factor                         | 1.89692 |
| CNAG_02441 | conserved hypothetical protein               | 1.89436 |
| CNAG_05283 | coenzyme A transporter                       | 1.88913 |
| CNAG_05670 | conserved hypothetical protein               | 1.88907 |
| CNAG_06244 | conserved hypothetical protein               | 1.88864 |
| CNAG_00032 | aldolase                                     | 1.88837 |
| CNAG_00295 | predicted protein                            | 1.88657 |
| CNAG_07490 | predicted protein                            | 1.88505 |
| CNAG_04486 | conserved hypothetical protein               | 1.88453 |
| CNAG_00559 | conserved hypothetical protein               | 1.88305 |
| CNAG_02999 | conserved hypothetical protein               | 1.88201 |
| CNAG_02757 | conserved hypothetical protein               | 1.88100 |
| CNAG_04113 | conserved hypothetical protein               | 1.87901 |
| CNAG_04240 | conserved hypothetical protein               | 1.87752 |
| CNAG_04634 | conserved hypothetical protein               | 1.87675 |
| CNAG_02483 | conserved hypothetical protein               | 1.87476 |
| CNAG_02476 | conserved hypothetical protein               | 1.87394 |
| CNAG_00964 | conserved hypothetical protein               | 1.87061 |
| CNAG_03427 | aconitate hydratase                          | 1.86953 |
| CNAG_06238 | conserved hypothetical protein               | 1.86798 |
| CNAG_01188 | peroxin19 Pex19p                             | 1.86725 |
| CNAG_02237 | cytoskeleton assembly control protein        | 1.86305 |
| CNAG_06073 | predicted protein                            | 1.85827 |
| CNAG_04602 | conserved hypothetical protein               | 1.85727 |
| CNAG_06474 | heterogeneous nuclear ribonucleoprotein HRP1 | 1.85242 |
| CNAG_05608 | conserved hypothetical protein               | 1.85102 |
| CNAG_06214 | predicted protein                            | 1.85099 |
| CNAG_02570 | predicted protein                            | 1.85014 |
| CNAG_07307 | hypothetical protein                         | 1.84839 |
| CNAG_05517 | conserved hypothetical protein               | 1.84797 |
| CNAG_06311 | cytoplasmic protein                          | 1.84665 |
| CNAG_04707 | conserved hypothetical protein               | 1.84557 |
| CNAG_06075 | conserved hypothetical protein               | 1.84438 |
| CNAG_07838 | cytoplasmic protein                          | 1.83607 |
| CNAG_00516 | peroxisome targeting signal receptor         | 1.83487 |
| CNAG_01834 | conserved hypothetical protein               | 1.83370 |
| CNAG_04273 | conserved hypothetical protein               | 1.83271 |
| CNAG_06522 | conserved hypothetical protein               | 1.83165 |
| CNAG_04892 | conserved hypothetical protein               | 1.82959 |
| CNAG_06151 | transferase                                  | 1.82958 |
| CNAG_01156 | CAP2p                                        | 1.82949 |
| CNAG_05518 | conserved hypothetical protein               | 1.82896 |
| CNAG_05889 | SH3YL1 protein                               | 1.82831 |

|            |                                                                  |         |
|------------|------------------------------------------------------------------|---------|
| CNAG_00292 | zinc-finger protein zpr1                                         | 1.82783 |
| CNAG_07662 | hypothetical protein                                             | 1.82711 |
| CNAG_05930 | conserved hypothetical protein                                   | 1.82591 |
| CNAG_07401 | predicted protein                                                | 1.82557 |
| CNAG_01882 | protein-lysine N-methyltransferase                               | 1.82383 |
| CNAG_07395 | conserved hypothetical protein                                   | 1.82340 |
| CNAG_01097 | short-chain dehydrogenase/reductase SDR                          | 1.82304 |
| CNAG_01265 | charged multivesicular body protein 6-A                          | 1.81524 |
| CNAG_02604 | conserved hypothetical protein                                   | 1.81493 |
| CNAG_01441 | conserved hypothetical protein                                   | 1.80922 |
| CNAG_01604 | haloacid dehalogenase-like hydrolase domain-containing protein 2 | 1.80779 |
| CNAG_03542 | arginase                                                         | 1.80655 |
| CNAG_03016 | chaperone regulator                                              | 1.80579 |
| CNAG_07402 | pantothenate transporter                                         | 1.80038 |
| CNAG_06509 | conserved hypothetical protein                                   | 1.80000 |
| CNAG_02107 | conserved hypothetical protein                                   | 1.79980 |
| CNAG_01497 | integral membrane protein                                        | 1.79827 |
| CNAG_06498 | conserved hypothetical protein                                   | 1.79683 |
| CNAG_03162 | vacuolar protein                                                 | 1.79292 |
| CNAG_00090 | conserved hypothetical protein                                   | 1.79124 |
| CNAG_07908 | aconitate hydratase                                              | 1.78919 |
| CNAG_04946 | conserved hypothetical protein                                   | 1.78840 |
| CNAG_03395 | NifU-like protein c                                              | 1.78801 |
| CNAG_06217 | conserved hypothetical protein                                   | 1.78746 |
| CNAG_04760 | cytoplasmic protein                                              | 1.78640 |
| CNAG_05846 | UBC25                                                            | 1.78623 |
| CNAG_03407 | predicted protein                                                | 1.78518 |
| CNAG_07911 | streptomycin biosynthesis protein StrI                           | 1.78427 |
| CNAG_03275 | glutaryl-CoA dehydrogenase                                       | 1.78374 |
| CNAG_00907 | conserved hypothetical protein                                   | 1.78337 |
| CNAG_07734 | predicted protein                                                | 1.78251 |
| CNAG_05910 | conserved hypothetical protein                                   | 1.77976 |
| CNAG_05092 | predicted protein                                                | 1.77954 |
| CNAG_00915 | conserved hypothetical protein                                   | 1.77933 |
| CNAG_03695 | Cas41p                                                           | 1.77889 |
| CNAG_05732 | predicted protein                                                | 1.77862 |
| CNAG_02501 | conserved hypothetical protein                                   | 1.77860 |
| CNAG_05592 | calcium-transporting ATPase                                      | 1.77772 |
| CNAG_06781 | conserved hypothetical protein                                   | 1.77332 |
| CNAG_06172 | transketolase                                                    | 1.77211 |
| CNAG_00303 | high-affinity nicotinic acid transporter                         | 1.76761 |
| CNAG_02988 | acetyltransferase                                                | 1.76752 |
| CNAG_03082 | cupin domain-containing protein                                  | 1.76676 |
| CNAG_07823 | predicted protein                                                | 1.76675 |
| CNAG_07616 | C6 zinc finger domain-containing protein                         | 1.76652 |
| CNAG_00897 | glucosidase                                                      | 1.76440 |



|            |                                                 |         |
|------------|-------------------------------------------------|---------|
| CNAG_07729 | hypothetical protein                            | 1.76393 |
| CNAG_06116 | conserved hypothetical protein                  | 1.76325 |
| CNAG_06294 | DUF1338 domain-containing protein               | 1.75301 |
| CNAG_06892 | preconditioning-inducible gene 1 protein        | 1.75148 |
| CNAG_04561 | monooxygenase protein                           | 1.74632 |
| CNAG_03614 | predicted protein                               | 1.74482 |
| CNAG_05649 | conserved hypothetical protein                  | 1.74264 |
| CNAG_03454 | pria protein                                    | 1.73952 |
| CNAG_02752 | short-chain dehydrogenase                       | 1.73934 |
| CNAG_07833 | conserved hypothetical protein                  | 1.73917 |
| CNAG_00497 | conserved hypothetical protein                  | 1.73911 |
| CNAG_00796 | multidrug resistance protein 1                  | 1.73873 |
| CNAG_07369 | predicted protein                               | 1.73185 |
| CNAG_07304 | conserved hypothetical protein                  | 1.73050 |
| CNAG_03958 | conserved hypothetical protein                  | 1.73033 |
| CNAG_06914 | tubulin gamma chain                             | 1.73024 |
| CNAG_00797 | acetate-CoA ligase                              | 1.72853 |
| CNAG_03828 | aromatic amino acid aminotransferase I          | 1.72734 |
| CNAG_07573 | DNA ligase 4                                    | 1.72682 |
| CNAG_03882 | conserved hypothetical protein                  | 1.72669 |
| CNAG_02160 | conserved hypothetical protein                  | 1.72361 |
| CNAG_02660 | conserved hypothetical protein                  | 1.72254 |
| CNAG_02353 | conserved hypothetical protein                  | 1.72130 |
| CNAG_03851 | conserved hypothetical protein                  | 1.71845 |
| CNAG_01422 | endoplasmic reticulum protein                   | 1.71803 |
| CNAG_04993 | conserved hypothetical protein                  | 1.71618 |
| CNAG_05066 | conserved hypothetical protein                  | 1.71598 |
| CNAG_05936 | DNA-directed RNA polymerase III largest subunit | 1.71565 |
| CNAG_02043 | conserved hypothetical protein                  | 1.71014 |
| CNAG_07584 | conserved hypothetical protein                  | 1.70848 |
| CNAG_04103 | DUF895 domain membrane protein                  | 1.70636 |
| CNAG_00079 | conserved hypothetical protein                  | 1.70343 |
| CNAG_05981 | conserved hypothetical protein                  | 1.70054 |
| CNAG_00284 | efflux protein EncT                             | 1.69854 |
| CNAG_02000 | short-chain dehydrogenase                       | 1.69794 |
| CNAG_02255 | BNR/Asp-box repeat family protein               | 1.69205 |
| CNAG_03401 | conserved hypothetical protein                  | 1.69096 |
| CNAG_02586 | sugar transporter                               | 1.68895 |
| CNAG_07042 | conserved hypothetical protein                  | 1.68469 |
| CNAG_07633 | predicted protein                               | 1.68372 |
| CNAG_02927 | thioredoxin family protein                      | 1.68343 |
| CNAG_02497 | thaumatin family protein                        | 1.68260 |
| CNAG_00678 | urease accessory protein ureG                   | 1.68137 |
| CNAG_03122 | predicted protein                               | 1.68002 |
| CNAG_02321 | conserved hypothetical protein                  | 1.67945 |
| CNAG_05746 | conserved hypothetical protein                  | 1.67893 |

|            |                                                    |         |
|------------|----------------------------------------------------|---------|
| CNAG_07366 | conserved hypothetical protein                     | 1.67807 |
| CNAG_05677 | phospholipase                                      | 1.67795 |
| CNAG_04728 | conserved hypothetical protein                     | 1.67515 |
| CNAG_01952 | aryl-alcohol dehydrogenase                         | 1.67459 |
| CNAG_06164 | conserved hypothetical protein                     | 1.67145 |
| CNAG_05472 | endodeoxyribonuclease                              | 1.66917 |
| CNAG_06443 | heat shock protein 70                              | 1.66821 |
| CNAG_01002 | conserved hypothetical protein                     | 1.66799 |
| CNAG_03595 | conserved hypothetical protein                     | 1.66691 |
| CNAG_06532 | conserved hypothetical protein                     | 1.66158 |
| CNAG_04359 | prib protein                                       | 1.65981 |
| CNAG_05407 | conserved hypothetical protein                     | 1.65976 |
| CNAG_06873 | 5-oxoprolinase                                     | 1.65560 |
| CNAG_03891 | heat shock protein                                 | 1.65559 |
| CNAG_03075 | conserved hypothetical protein                     | 1.65494 |
| CNAG_00003 | drug transporter                                   | 1.65442 |
| CNAG_02362 | conserved hypothetical protein                     | 1.65313 |
| CNAG_07539 | purine nucleotide binding protein                  | 1.64932 |
| CNAG_01851 | conserved hypothetical protein                     | 1.64866 |
| CNAG_04558 | predicted protein                                  | 1.64479 |
| CNAG_04953 | conserved hypothetical protein                     | 1.64408 |
| CNAG_06021 | rab GTPase activator                               | 1.64408 |
| CNAG_01256 | conserved hypothetical protein                     | 1.64398 |
| CNAG_03875 | UTP-hexose-1-phosphate uridylyltransferase         | 1.64175 |
| CNAG_01308 | conserved hypothetical protein                     | 1.64033 |
| CNAG_07821 | conserved hypothetical protein                     | 1.63821 |
| CNAG_05072 | endopeptidase                                      | 1.63533 |
| CNAG_03730 | DNA-directed RNA polymerase II kda polypeptide     | 1.63386 |
| CNAG_06523 | conserved hypothetical protein                     | 1.63329 |
| CNAG_05046 | predicted protein                                  | 1.63317 |
| CNAG_05735 | hypothetical protein                               | 1.63207 |
| CNAG_01034 | hypothetical protein                               | 1.63154 |
| CNAG_05872 | endopeptidase                                      | 1.62949 |
| CNAG_02673 | NAD dependent epimerase/dehydratase family protein | 1.62863 |
| CNAG_06372 | hypothetical protein                               | 1.62827 |
| CNAG_00550 | msh5                                               | 1.62778 |
| CNAG_07583 | conserved hypothetical protein                     | 1.62514 |
| CNAG_01445 | APG9                                               | 1.62479 |
| CNAG_06463 | predicted protein                                  | 1.62389 |
| CNAG_01769 | mitochondrial inner membrane protein               | 1.62374 |
| CNAG_06592 | ubiquitin conjugating enzyme                       | 1.61788 |
| CNAG_05842 | cytochrome P450                                    | 1.61606 |
| CNAG_00637 | cystathionine beta-synthase                        | 1.61473 |
| CNAG_02599 | aldolase                                           | 1.61198 |
| CNAG_06705 | predicted protein                                  | 1.61116 |
| CNAG_05244 | conserved hypothetical protein                     | 1.60962 |

|            |                                                   |         |
|------------|---------------------------------------------------|---------|
| CNAG_03195 | conserved hypothetical protein                    | 1.60775 |
| CNAG_01001 | conserved hypothetical protein                    | 1.60635 |
| CNAG_01759 | vacuolar membrane protein                         | 1.60425 |
| CNAG_06794 | conserved hypothetical protein                    | 1.60292 |
| CNAG_04338 | cation diffusion facilitator 1                    | 1.60237 |
| CNAG_02289 | Rab4                                              | 1.60228 |
| CNAG_03837 | protein-L-isoaspartate O-methyltransferase        | 1.60107 |
| CNAG_02904 | predicted protein                                 | 1.60081 |
| CNAG_05309 | conserved hypothetical protein                    | 1.59967 |
| CNAG_06490 | CAMK/CAMKL protein kinase                         | 1.59712 |
| CNAG_00549 | conserved hypothetical protein                    | 1.59680 |
| CNAG_03838 | conserved hypothetical protein                    | 1.59555 |
| CNAG_07780 | farnesyltranstransferase                          | 1.59492 |
| CNAG_01605 | rossman fold oxidoreductase                       | 1.59292 |
| CNAG_06853 | hypothetical protein                              | 1.59216 |
| CNAG_07276 | conserved hypothetical protein                    | 1.59112 |
| CNAG_00638 | GTPase                                            | 1.59042 |
| CNAG_06440 | DNA dependent ATPase                              | 1.58538 |
| CNAG_05180 | conserved hypothetical protein                    | 1.58347 |
| CNAG_03852 | predicted protein                                 | 1.58339 |
| CNAG_07704 | conserved hypothetical protein                    | 1.58334 |
| CNAG_04502 | conserved hypothetical protein                    | 1.58033 |
| CNAG_06905 | cytoplasmic protein                               | 1.58031 |
| CNAG_07668 | conserved hypothetical protein                    | 1.57951 |
| CNAG_06969 | conserved hypothetical protein                    | 1.57809 |
| CNAG_02155 | predicted protein                                 | 1.57757 |
| CNAG_06876 | alpha-ketoglutarate-dependent taurine dioxygenase | 1.57481 |
| CNAG_02892 | GPI mannosyltransferase 3                         | 1.57405 |
| CNAG_07813 | conserved hypothetical protein                    | 1.57328 |
| CNAG_02420 | conserved hypothetical protein                    | 1.57178 |
| CNAG_07723 | predicted protein                                 | 1.56740 |
| CNAG_05941 | conserved hypothetical protein                    | 1.56687 |
| CNAG_00710 | glutamine synthetase                              | 1.56610 |
| CNAG_06052 | galactose-1-phosphate uridylyltransferase         | 1.56546 |
| CNAG_07589 | xylitol dehydrogenase                             | 1.56497 |
| CNAG_02751 | short-chain dehydrogenase                         | 1.56336 |
| CNAG_02423 | conserved hypothetical protein                    | 1.55902 |
| CNAG_05397 | conserved hypothetical protein                    | 1.55864 |
| CNAG_07606 | predicted protein                                 | 1.55833 |
| CNAG_03756 | conserved hypothetical protein                    | 1.55705 |
| CNAG_04836 | nuclear protein                                   | 1.55675 |
| CNAG_02372 | conserved hypothetical protein                    | 1.55425 |
| CNAG_03117 | conserved hypothetical protein                    | 1.55211 |
| CNAG_05282 | protein transporter                               | 1.55027 |
| CNAG_03040 | transketolase                                     | 1.54976 |
| CNAG_05260 | glutamate decarboxylase                           | 1.54967 |

|            |                                               |         |
|------------|-----------------------------------------------|---------|
| CNAG_04523 | glyceraldehyde 3-phosphate dehydrogenase      | 1.54958 |
| CNAG_06285 | predicted protein                             | 1.54709 |
| CNAG_07799 | ABC transporter                               | 1.54656 |
| CNAG_01913 | conserved hypothetical protein                | 1.54587 |
| CNAG_06884 | conserved hypothetical protein                | 1.54549 |
| CNAG_04713 | CLYBL protein                                 | 1.54190 |
| CNAG_05777 | conserved hypothetical protein                | 1.54136 |
| CNAG_04911 | conserved hypothetical protein                | 1.54111 |
| CNAG_07525 | predicted protein                             | 1.54096 |
| CNAG_01466 | conserved hypothetical protein                | 1.54088 |
| CNAG_07390 | conserved hypothetical protein                | 1.53926 |
| CNAG_03217 | conserved hypothetical protein                | 1.53916 |
| CNAG_05253 | conserved hypothetical protein                | 1.53778 |
| CNAG_00247 | saccharopine dehydrogenase                    | 1.53591 |
| CNAG_06806 | ETF1                                          | 1.53580 |
| CNAG_05328 | conserved hypothetical protein                | 1.53399 |
| CNAG_02164 | conserved hypothetical protein                | 1.53380 |
| CNAG_01552 | BET1 protein                                  | 1.53023 |
| CNAG_04371 | conserved hypothetical protein                | 1.52886 |
| CNAG_00801 | conserved hypothetical protein                | 1.52857 |
| CNAG_05693 | conserved hypothetical protein                | 1.52854 |
| CNAG_04043 | DUF636 domain-containing protein              | 1.52732 |
| CNAG_04256 | conserved hypothetical protein                | 1.52647 |
| CNAG_03654 | ATP dependent DNA helicase                    | 1.52379 |
| CNAG_03282 | conserved hypothetical protein                | 1.52350 |
| CNAG_02409 | conserved hypothetical protein                | 1.52270 |
| CNAG_00850 | plant-inducible protein                       | 1.52113 |
| CNAG_02298 | vacuolar membrane protein                     | 1.52053 |
| CNAG_07861 | conserved hypothetical protein                | 1.51706 |
| CNAG_02662 | peptidase family C54 protein                  | 1.51642 |
| CNAG_05326 | predicted protein                             | 1.51524 |
| CNAG_07874 | sugar transporter                             | 1.51297 |
| CNAG_02966 | carboxypeptidase D                            | 1.51147 |
| CNAG_00014 | conserved hypothetical protein                | 1.51055 |
| CNAG_01795 | conserved hypothetical protein                | 1.50928 |
| CNAG_03548 | predicted protein                             | 1.50863 |
| CNAG_06760 | conserved hypothetical protein                | 1.50835 |
| CNAG_02596 | predicted protein                             | 1.50731 |
| CNAG_02293 | conserved hypothetical protein                | 1.50720 |
| CNAG_01540 | dehydrogenase                                 | 1.50538 |
| CNAG_07670 | predicted protein                             | 1.50443 |
| CNAG_04960 | conserved hypothetical protein                | 1.50340 |
| CNAG_03503 | ATP-binding cassette transporter protein YOR1 | 1.50179 |
| CNAG_07458 | hypothetical protein                          | 1.50053 |
| CNAG_02697 | conserved hypothetical protein                | 1.49996 |
| CNAG_02504 | conserved hypothetical protein                | 1.49960 |

|            |                                                   |         |
|------------|---------------------------------------------------|---------|
| CNAG_07717 | ubiquitin carboxyl-terminal hydrolase 12          | 1.49807 |
| CNAG_07617 | conserved hypothetical protein                    | 1.49136 |
| CNAG_07809 | hypothetical protein                              | 1.49135 |
| CNAG_07629 | endopolyphosphatase                               | 1.49091 |
| CNAG_01670 | conserved hypothetical protein                    | 1.48839 |
| CNAG_03847 | conserved hypothetical protein                    | 1.48765 |
| CNAG_00582 | conserved hypothetical protein                    | 1.48117 |
| CNAG_06266 | conserved hypothetical protein                    | 1.47882 |
| CNAG_03054 | conserved hypothetical protein                    | 1.47722 |
| CNAG_03250 | conserved hypothetical protein                    | 1.47384 |
| CNAG_03889 | conserved hypothetical protein                    | 1.47292 |
| CNAG_01154 | conserved hypothetical protein                    | 1.47208 |
| CNAG_07785 | predicted protein                                 | 1.46914 |
| CNAG_00419 | conserved hypothetical protein                    | 1.46896 |
| CNAG_05064 | conserved hypothetical protein                    | 1.46685 |
| CNAG_01180 | conserved hypothetical protein                    | 1.46623 |
| CNAG_06114 | GTPase                                            | 1.46482 |
| CNAG_05430 | conserved hypothetical protein                    | 1.46339 |
| CNAG_00445 | HMG1                                              | 1.46302 |
| CNAG_03644 | CAS3p                                             | 1.46252 |
| CNAG_05482 | conserved hypothetical protein                    | 1.46040 |
| CNAG_01564 | RNA-binding protein                               | 1.45876 |
| CNAG_06243 | conserved hypothetical protein                    | 1.45829 |
| CNAG_01069 | conserved hypothetical protein                    | 1.45638 |
| CNAG_01706 | predicted protein                                 | 1.45625 |
| CNAG_00696 | alpha-mannosidase                                 | 1.45505 |
| CNAG_05963 | conserved hypothetical protein                    | 1.45466 |
| CNAG_05339 | conserved hypothetical protein                    | 1.45287 |
| CNAG_06349 | conserved hypothetical protein                    | 1.44971 |
| CNAG_05990 | predicted protein                                 | 1.44969 |
| CNAG_00757 | ubiquitin-specific protease                       | 1.44780 |
| CNAG_06956 | conserved hypothetical protein                    | 1.44619 |
| CNAG_05974 | predicted protein                                 | 1.44261 |
| CNAG_02096 | peroxisomal membrane protein pex16                | 1.44229 |
| CNAG_05215 | conserved hypothetical protein                    | 1.44103 |
| CNAG_02834 | UDP-glucose:sterol glucosyltransferase            | 1.44015 |
| CNAG_07840 | conserved hypothetical protein                    | 1.43857 |
| CNAG_03051 | polyamine transporter                             | 1.43548 |
| CNAG_00008 | conserved hypothetical protein                    | 1.43281 |
| CNAG_04688 | acyl-CoA dehydrogenase                            | 1.43000 |
| CNAG_04065 | UDP-N-acetylglucosamine transferase subunit ALG13 | 1.42914 |
| CNAG_02225 | cellulase                                         | 1.42716 |
| CNAG_04557 | predicted protein                                 | 1.42413 |
| CNAG_04142 | tartrate transporter                              | 1.42282 |
| CNAG_04225 | DUF1479 domain-containing protein                 | 1.42048 |
| CNAG_02531 | CMGC/MAPK/ERK protein kinase                      | 1.41801 |

|            |                                                                    |         |
|------------|--------------------------------------------------------------------|---------|
| CNAG_01186 | gp165                                                              | 1.41565 |
| CNAG_02283 | glucan 1,4-alpha-glucosidase                                       | 1.41438 |
| CNAG_03135 | DUF803 domain membrane protein                                     | 1.41249 |
| CNAG_03309 | pre-mRNA-splicing factor CWC21                                     | 1.41213 |
| CNAG_05718 | multidrug resistance protein fnx1                                  | 1.41187 |
| CNAG_00752 | transducin family protein                                          | 1.41041 |
| CNAG_06809 | other/IKS protein kinase                                           | 1.40841 |
| CNAG_02217 | chitin synthase 7                                                  | 1.40745 |
| CNAG_03976 | conserved hypothetical protein                                     | 1.40673 |
| CNAG_05467 | predicted protein                                                  | 1.40646 |
| CNAG_04013 | potassium channel                                                  | 1.40557 |
| CNAG_03489 | RNA recognition domain-containing protein (RRM)-containing protein | 1.40402 |
| CNAG_06904 | conserved hypothetical protein                                     | 1.40228 |
| CNAG_00596 | Utr2p                                                              | 1.40154 |
| CNAG_00029 | D-3-phosphoglycerate dehydrogenase                                 | 1.40125 |
| CNAG_07587 | hypothetical protein                                               | 1.40018 |
| CNAG_06334 | conserved hypothetical protein                                     | 1.39952 |
| CNAG_05768 | conserved hypothetical protein                                     | 1.39784 |
| CNAG_06771 | conserved hypothetical protein                                     | 1.39734 |
| CNAG_06009 | cyclohydrolase                                                     | 1.39323 |
| CNAG_00080 | conserved hypothetical protein                                     | 1.39036 |
| CNAG_02052 | dimeric dihydrodiol dehydrogenase                                  | 1.39024 |
| CNAG_05727 | conserved hypothetical protein                                     | 1.38969 |
| CNAG_01317 | conserved hypothetical protein                                     | 1.38730 |
| CNAG_01064 | conserved hypothetical protein                                     | 1.38721 |
| CNAG_04675 | conserved hypothetical protein                                     | 1.38045 |
| CNAG_03381 | conserved hypothetical protein                                     | 1.38016 |
| CNAG_07626 | NAD-binding Rossmann fold oxidoreductase family protein            | 1.38011 |
| CNAG_04649 | L-A virus GAG protein N-acetyltransferase                          | 1.37700 |
| CNAG_04956 | high-affinity nicotinic acid transporter                           | 1.37504 |
| CNAG_00893 | conserved hypothetical protein                                     | 1.37376 |
| CNAG_04618 | PRO1 protein                                                       | 1.37284 |
| CNAG_00889 | conserved hypothetical protein                                     | 1.37148 |
| CNAG_01893 | glutathione S-transferase Gst3                                     | 1.37128 |
| CNAG_05539 | conserved hypothetical protein                                     | 1.36896 |
| CNAG_00242 | predicted protein                                                  | 1.36808 |
| CNAG_02484 | peptidylprolyl isomerase                                           | 1.36712 |
| CNAG_06657 | conserved hypothetical protein                                     | 1.36675 |
| CNAG_05018 | conserved hypothetical protein                                     | 1.36616 |
| CNAG_04466 | UPF0061 protein                                                    | 1.36523 |
| CNAG_01401 | conserved hypothetical protein                                     | 1.36473 |
| CNAG_05784 | conserved hypothetical protein                                     | 1.36305 |
| CNAG_05346 | peroxisomal sarcosine oxidase                                      | 1.35703 |
| CNAG_07754 | conserved hypothetical protein                                     | 1.35496 |
| CNAG_01651 | glycosidase                                                        | 1.35487 |

|            |                                                             |         |
|------------|-------------------------------------------------------------|---------|
| CNAG_07338 | N-acyl-phosphatidylethanolamine-hydrolyzing phospholipase D | 1.35027 |
| CNAG_01823 | myo-inositol monophosphatase                                | 1.34801 |
| CNAG_03280 | dihydrodipicolinate synthetase family protein               | 1.34663 |
| CNAG_07315 | conserved hypothetical protein                              | 1.34406 |
| CNAG_02706 | predicted protein                                           | 1.34385 |
| CNAG_04263 | conserved hypothetical protein                              | 1.34369 |
| CNAG_00765 | conserved hypothetical protein                              | 1.34337 |
| CNAG_02397 | conserved hypothetical protein                              | 1.34327 |
| CNAG_05540 | urease                                                      | 1.34291 |
| CNAG_00262 | conserved hypothetical protein                              | 1.34279 |
| CNAG_02312 | patatin-like phospholipase domain-containing protein        | 1.34246 |
| CNAG_03909 | conserved hypothetical protein                              | 1.34168 |
| CNAG_06202 | conserved hypothetical protein                              | 1.34164 |
| CNAG_07841 | conserved hypothetical protein                              | 1.33857 |
| CNAG_07394 | conserved hypothetical protein                              | 1.33838 |
| CNAG_05364 | conserved hypothetical protein                              | 1.33648 |
| CNAG_05231 | nuclear protein                                             | 1.33604 |
| CNAG_00436 | palmitoyltransferase AKR1                                   | 1.33487 |
| CNAG_04443 | conserved hypothetical protein                              | 1.33284 |
| CNAG_06390 | conserved hypothetical protein                              | 1.33188 |
| CNAG_04167 | conserved hypothetical protein                              | 1.32959 |
| CNAG_06260 | hydrolase                                                   | 1.32889 |
| CNAG_02929 | transcription initiation factor tfiid 111 kda subunit       | 1.32794 |
| CNAG_01848 | conserved hypothetical protein                              | 1.32794 |
| CNAG_00967 | conserved hypothetical protein                              | 1.32516 |
| CNAG_00866 | transketolase                                               | 1.32070 |
| CNAG_04974 | conserved hypothetical protein                              | 1.31759 |
| CNAG_06337 | conserved hypothetical protein                              | 1.31692 |
| CNAG_00816 | microtubule binding protein                                 | 1.31655 |
| CNAG_06595 | conserved hypothetical protein                              | 1.31481 |
| CNAG_00181 | macrophage erythroblast attacher isoform 1                  | 1.31416 |
| CNAG_04631 | ribitol kinase                                              | 1.31134 |
| CNAG_04033 | alpha glucosidase                                           | 1.31057 |
| CNAG_06787 | metacaspase                                                 | 1.30904 |
| CNAG_04987 | conserved hypothetical protein                              | 1.30857 |
| CNAG_06321 | conserved hypothetical protein                              | 1.30812 |
| CNAG_06601 | amidohydrolase family protein                               | 1.30742 |
| CNAG_00544 | conserved hypothetical protein                              | 1.30727 |
| CNAG_02973 | tRNA-intron endonuclease                                    | 1.30712 |
| CNAG_00884 | exocyst complex component protein                           | 1.30567 |
| CNAG_06805 | predicted protein                                           | 1.30527 |
| CNAG_05053 | conserved hypothetical protein                              | 1.30521 |
| CNAG_04758 | ammonium transporter                                        | 1.30461 |
| CNAG_03752 | conserved hypothetical protein                              | 1.30212 |
| CNAG_05645 | conserved hypothetical protein                              | 1.30086 |
| CNAG_02776 | conserved hypothetical protein                              | 1.30073 |

|            |                                                    |         |
|------------|----------------------------------------------------|---------|
| CNAG_05446 | Kex2                                               | 1.29987 |
| CNAG_03734 | conserved hypothetical protein                     | 1.29939 |
| CNAG_00287 | cytoplasmic protein                                | 1.29928 |
| CNAG_01213 | conserved hypothetical protein                     | 1.29919 |
| CNAG_07684 | predicted protein                                  | 1.29542 |
| CNAG_03436 | transaminase                                       | 1.29345 |
| CNAG_06249 | taurine catabolism dioxygenase TauD                | 1.29253 |
| CNAG_02592 | thioredoxin reductase GlIT                         | 1.29149 |
| CNAG_02049 | proline dehydrogenase                              | 1.29130 |
| CNAG_07858 | predicted protein                                  | 1.29125 |
| CNAG_03478 | conserved hypothetical protein                     | 1.28980 |
| CNAG_04157 | conserved hypothetical protein                     | 1.28954 |
| CNAG_01061 | serine/threonine protein kinase                    | 1.28860 |
| CNAG_01078 | aldehyde dehydrogenase                             | 1.28842 |
| CNAG_00898 | multidrug efflux pump                              | 1.28837 |
| CNAG_04565 | conserved hypothetical protein                     | 1.28542 |
| CNAG_04158 | transcription corepressor                          | 1.28484 |
| CNAG_06252 | conserved hypothetical protein                     | 1.28384 |
| CNAG_07763 | conserved hypothetical protein                     | 1.28351 |
| CNAG_01261 | myosin I binding protein                           | 1.28345 |
| CNAG_04107 | conserved hypothetical protein                     | 1.28265 |
| CNAG_01827 | conserved hypothetical protein                     | 1.28052 |
| CNAG_03110 | conserved hypothetical protein                     | 1.28006 |
| CNAG_06801 | conserved hypothetical protein                     | 1.27964 |
| CNAG_04673 | NAD dependent epimerase/dehydratase family protein | 1.27951 |
| CNAG_05355 | ubiquitin-protein ligase                           | 1.27791 |
| CNAG_04563 | fungal specific transcription factor               | 1.27719 |
| CNAG_04509 | conserved hypothetical protein                     | 1.27676 |
| CNAG_03840 | pre-mRNA-splicing factor CWC26                     | 1.27641 |
| CNAG_07475 | predicted protein                                  | 1.27430 |
| CNAG_00756 | conserved hypothetical protein                     | 1.26896 |
| CNAG_04622 | endoplasmic reticulum protein                      | 1.26784 |
| CNAG_00133 | conserved hypothetical protein                     | 1.26753 |
| CNAG_07909 | MmLim15 protein                                    | 1.26610 |
| CNAG_05129 | predicted protein                                  | 1.26498 |
| CNAG_06985 | beta-glucosidase                                   | 1.26459 |
| CNAG_04936 | conserved hypothetical protein                     | 1.26427 |
| CNAG_06561 | allantoate transporter                             | 1.26322 |
| CNAG_03447 | conserved hypothetical protein                     | 1.26292 |
| CNAG_04660 | conserved hypothetical protein                     | 1.26249 |
| CNAG_05155 | protein-tyrosine-phosphatase                       | 1.26222 |
| CNAG_01499 | conserved hypothetical protein                     | 1.26064 |
| CNAG_00229 | predicted protein                                  | 1.25986 |
| CNAG_00923 | membrane protein                                   | 1.25982 |
| CNAG_01606 | conserved hypothetical protein                     | 1.25901 |
| CNAG_07436 | predicted protein                                  | 1.25862 |



|            |                                   |         |
|------------|-----------------------------------|---------|
| CNAG_04108 | kinase                            | 1.25735 |
| CNAG_00960 | pre-mRNA splicing factor          | 1.25584 |
| CNAG_05380 | conserved hypothetical protein    | 1.25563 |
| CNAG_00011 | conserved hypothetical protein    | 1.25443 |
| CNAG_05999 | peptide alpha-N-acetyltransferase | 1.25396 |
| CNAG_05154 | membrane fraction protein         | 1.25154 |
| CNAG_03742 | transcription factor              | 1.24813 |
| CNAG_04397 | conserved hypothetical protein    | 1.24789 |
| CNAG_07943 | conserved hypothetical protein    | 1.24778 |
| CNAG_03355 | CnHHK4                            | 1.24731 |
| CNAG_04534 | conserved hypothetical protein    | 1.24421 |
| CNAG_05548 | conserved hypothetical protein    | 1.24348 |
| CNAG_07853 | predicted protein                 | 1.24145 |
| CNAG_01931 | conserved hypothetical protein    | 1.24106 |
| CNAG_06159 | conserved hypothetical protein    | 1.24099 |
| CNAG_03949 | 4-nitrophenylphosphatase          | 1.24073 |
| CNAG_02524 | conserved hypothetical protein    | 1.24013 |
| CNAG_04784 | monosaccharide transporter        | 1.23900 |
| CNAG_00868 | predicted protein                 | 1.23882 |
| CNAG_04361 | conserved hypothetical protein    | 1.23865 |
| CNAG_05306 | conserved hypothetical protein    | 1.23743 |
| CNAG_06867 | conserved hypothetical protein    | 1.23687 |
| CNAG_02684 | conserved hypothetical protein    | 1.23597 |
| CNAG_04140 | conserved hypothetical protein    | 1.23590 |
| CNAG_00141 | monooxygenase                     | 1.23381 |
| CNAG_01162 | conserved hypothetical protein    | 1.23365 |
| CNAG_05598 | conserved hypothetical protein    | 1.23331 |
| CNAG_04154 | conserved hypothetical protein    | 1.23324 |
| CNAG_07404 | predicted protein                 | 1.23252 |
| CNAG_05019 | conserved hypothetical protein    | 1.23237 |
| CNAG_06815 | FAO1                              | 1.23236 |
| CNAG_00048 | sugar transporter                 | 1.23167 |
| CNAG_06102 | eukaryotic ADP/ATP carrier        | 1.23159 |
| CNAG_06593 | rhamnogalacturonan lyase          | 1.22864 |
| CNAG_00503 | conserved hypothetical protein    | 1.22848 |
| CNAG_01846 | flavoprotein                      | 1.22787 |
| CNAG_05038 | conserved hypothetical protein    | 1.22782 |
| CNAG_07513 | conserved hypothetical protein    | 1.22714 |
| CNAG_07692 | nucleoside phosphatase            | 1.22608 |
| CNAG_06636 | conserved hypothetical protein    | 1.22558 |
| CNAG_02332 | conserved hypothetical protein    | 1.22540 |
| CNAG_02229 | farnesyltransferase               | 1.22509 |
| CNAG_00460 | conserved hypothetical protein    | 1.22317 |
| CNAG_07440 | nuclear migration protein nudF    | 1.22262 |
| CNAG_00060 | chaperone regulator               | 1.22241 |
| CNAG_06381 | DUF221 family protein             | 1.22214 |

|            |                                          |         |
|------------|------------------------------------------|---------|
| CNAG_02363 | SCR1 protein                             | 1.22111 |
| CNAG_02667 | conserved hypothetical protein           | 1.22047 |
| CNAG_01048 | conserved hypothetical protein           | 1.21897 |
| CNAG_03037 | WDR8 protein                             | 1.21693 |
| CNAG_00566 | DNA ligase                               | 1.21672 |
| CNAG_00421 | GH14561p                                 | 1.21509 |
| CNAG_01207 | conserved hypothetical protein           | 1.21478 |
| CNAG_06482 | amidase                                  | 1.21091 |
| CNAG_02703 | conserved hypothetical protein           | 1.20810 |
| CNAG_07906 | conserved hypothetical protein           | 1.20784 |
| CNAG_04677 | xylitol dehydrogenase                    | 1.20735 |
| CNAG_03212 | fork head domain-containing protein      | 1.20437 |
| CNAG_06338 | ABC transporter PMR5                     | 1.20379 |
| CNAG_00164 | conserved hypothetical protein           | 1.20130 |
| CNAG_02119 | conserved hypothetical protein           | 1.20018 |
| CNAG_05060 | conserved hypothetical protein           | 1.19824 |
| CNAG_07500 | hypothetical protein                     | 1.19531 |
| CNAG_05220 | phosphatidylinositol 3-kinase            | 1.19402 |
| CNAG_04750 | conserved hypothetical protein           | 1.19308 |
| CNAG_01897 | bromodomain transcription factor         | 1.19215 |
| CNAG_07391 | hypothetical protein                     | 1.19191 |
| CNAG_05528 | conserved hypothetical protein           | 1.19161 |
| CNAG_05560 | short chain dehydrogenase                | 1.18978 |
| CNAG_01541 | conserved hypothetical protein           | 1.18978 |
| CNAG_02942 | conserved hypothetical protein           | 1.18892 |
| CNAG_05292 | alpha,alpha-trehalose-phosphate synthase | 1.18793 |
| CNAG_06533 | ATP-dependent permease                   | 1.18763 |
| CNAG_03890 | conserved hypothetical protein           | 1.18514 |
| CNAG_04582 | conserved hypothetical protein           | 1.18122 |
| CNAG_04745 | conserved hypothetical protein           | 1.18092 |
| CNAG_06259 | alpha-glucoside:hydrogen symporter       | 1.18000 |
| CNAG_00823 | cadmium ion transporter                  | 1.17809 |
| CNAG_07730 | tricarboxylate transport protein         | 1.17688 |
| CNAG_05580 | predicted protein                        | 1.17595 |
| CNAG_07305 | conserved hypothetical protein           | 1.17569 |
| CNAG_06263 | conserved hypothetical protein           | 1.17564 |
| CNAG_03980 | conserved hypothetical protein           | 1.17538 |
| CNAG_04315 | RCC2 protein                             | 1.17441 |
| CNAG_02986 | phosphoribosyl-ATP diphosphatase         | 1.17305 |
| CNAG_06562 | predicted protein                        | 1.17166 |
| CNAG_03707 | efflux protein                           | 1.17128 |
| CNAG_00586 | conserved hypothetical protein           | 1.16895 |
| CNAG_03516 | conserved hypothetical protein           | 1.16748 |
| CNAG_04746 | conserved hypothetical protein           | 1.16711 |
| CNAG_09001 | conserved hypothetical protein           | 1.16244 |
| CNAG_00074 | integral to plasma membrane protein      | 1.15994 |

|            |                                                    |         |
|------------|----------------------------------------------------|---------|
| CNAG_06540 | dihydroxy-acid dehydratase                         | 1.15915 |
| CNAG_05508 | conserved hypothetical protein                     | 1.15892 |
| CNAG_07607 | chaperone regulator                                | 1.15887 |
| CNAG_00333 | conserved hypothetical protein                     | 1.15689 |
| CNAG_00328 | single-stranded DNA specific endodeoxyribonuclease | 1.15607 |
| CNAG_02064 | helicase                                           | 1.15557 |
| CNAG_05293 | glycogenin glucosyltransferase                     | 1.15555 |
| CNAG_06695 | conserved hypothetical protein                     | 1.15352 |
| CNAG_06330 | conserved hypothetical protein                     | 1.15227 |
| CNAG_03024 | AGC-group protein kinase                           | 1.15170 |
| CNAG_05733 | cytoplasmic protein                                | 1.15096 |
| CNAG_01391 | CDC37                                              | 1.14909 |
| CNAG_05461 | cytochrome b2                                      | 1.14301 |
| CNAG_03830 | conserved hypothetical protein                     | 1.14289 |
| CNAG_07835 | predicted protein                                  | 1.14273 |
| CNAG_00064 | COPII-coated vesicle protein                       | 1.14202 |
| CNAG_00981 | conserved hypothetical protein                     | 1.14057 |
| CNAG_04562 | predicted protein                                  | 1.14023 |
| CNAG_04915 | predicted protein                                  | 1.14006 |
| CNAG_07830 | conserved hypothetical protein                     | 1.13750 |
| CNAG_05639 | conserved hypothetical protein                     | 1.13745 |
| CNAG_01999 | predicted protein                                  | 1.13735 |
| CNAG_04651 | conserved hypothetical protein                     | 1.13607 |
| CNAG_02512 | DNA repair protein rad16                           | 1.13582 |
| CNAG_05104 | CAMK-group protein kinase                          | 1.13545 |
| CNAG_03177 | conserved hypothetical protein                     | 1.13467 |
| CNAG_03307 | predicted protein                                  | 1.13406 |
| CNAG_05015 | catalase 4                                         | 1.13342 |
| CNAG_04865 | mannitol dehydrogenase                             | 1.13261 |
| CNAG_02735 | hypothetical protein                               | 1.13247 |
| CNAG_00357 | ribonuclease H                                     | 1.12576 |
| CNAG_01465 | 5' flap endonuclease                               | 1.12572 |
| CNAG_03178 | conserved hypothetical protein                     | 1.12459 |
| CNAG_03141 | conserved hypothetical protein                     | 1.12403 |
| CNAG_07591 | mitochondrial metalloendopeptidase OMA1            | 1.12347 |
| CNAG_06459 | vacuolar membrane protein                          | 1.12226 |
| CNAG_01055 | phospholipid transporter                           | 1.12025 |
| CNAG_07164 | Aim25p                                             | 1.11663 |
| CNAG_00908 | conserved hypothetical protein                     | 1.11633 |
| CNAG_00791 | conserved hypothetical protein                     | 1.11543 |
| CNAG_02282 | carboxypeptidase A4                                | 1.11525 |
| CNAG_07522 | conserved hypothetical protein                     | 1.11389 |
| CNAG_04039 | iron sulfur cluster assembly protein 1             | 1.11348 |
| CNAG_01380 | conserved hypothetical protein                     | 1.11306 |
| CNAG_00363 | two-component sensor molecule                      | 1.11296 |
| CNAG_00396 | AGC/PKA protein kinase                             | 1.11289 |

|            |                                                            |         |
|------------|------------------------------------------------------------|---------|
| CNAG_03946 | galactokinase                                              | 1.11264 |
| CNAG_03531 | 3-beta hydroxysteroid dehydrogenase/isomerase              | 1.11236 |
| CNAG_05714 | conserved hypothetical protein                             | 1.11230 |
| CNAG_05257 | predicted protein                                          | 1.11220 |
| CNAG_00547 | conserved hypothetical protein                             | 1.10949 |
| CNAG_05879 | predicted protein                                          | 1.10878 |
| CNAG_05256 | catalase                                                   | 1.10804 |
| CNAG_01212 | conserved hypothetical protein                             | 1.10677 |
| CNAG_02953 | tuberin                                                    | 1.10616 |
| CNAG_04097 | glucose 1-dehydrogenase                                    | 1.10561 |
| CNAG_00492 | conserved hypothetical protein                             | 1.10357 |
| CNAG_01857 | conserved hypothetical protein                             | 1.10304 |
| CNAG_02889 | predicted protein                                          | 1.10250 |
| CNAG_06161 | Pip5k3 protein                                             | 1.10108 |
| CNAG_00375 | transcriptional activator gcn5                             | 1.09902 |
| CNAG_01266 | ATP-dependent protease La                                  | 1.09773 |
| CNAG_05272 | conserved hypothetical protein                             | 1.09718 |
| CNAG_07632 | aspartate aminotransferase                                 | 1.09661 |
| CNAG_01567 | DUF1688 domain-containing protein                          | 1.09588 |
| CNAG_04042 | conserved hypothetical protein                             | 1.09557 |
| CNAG_07866 | predicted protein                                          | 1.09535 |
| CNAG_06552 | CAMK/CAMKL/AMPK protein kinase                             | 1.09484 |
| CNAG_04339 | nuclear mRNA splicing protein                              | 1.09471 |
| CNAG_01870 | mitochondrial protein                                      | 1.09449 |
| CNAG_07501 | hypothetical protein                                       | 1.09240 |
| CNAG_00369 | conserved hypothetical protein                             | 1.08339 |
| CNAG_06529 | conserved hypothetical protein                             | 1.08253 |
| CNAG_00078 | vacuolar protein                                           | 1.08156 |
| CNAG_04479 | conserved hypothetical protein                             | 1.08147 |
| CNAG_06553 | conserved hypothetical protein                             | 1.08011 |
| CNAG_00124 | CAS3p                                                      | 1.07746 |
| CNAG_04744 | mannose-6-phosphate isomerase                              | 1.07723 |
| CNAG_05065 | conserved hypothetical protein                             | 1.07711 |
| CNAG_04485 | long-chain-fatty-acid-CoA-ligase                           | 1.07592 |
| CNAG_04309 | conserved hypothetical protein                             | 1.07557 |
| CNAG_00425 | predicted protein                                          | 1.07376 |
| CNAG_00583 | conserved hypothetical protein                             | 1.07263 |
| CNAG_04530 | DNA-binding protein                                        | 1.07202 |
| CNAG_05043 | conserved hypothetical protein                             | 1.07151 |
| CNAG_00241 | arginine methyltransferase-interacting ring finger protein | 1.07146 |
| CNAG_05097 | cytoplasmic protein                                        | 1.07004 |
| CNAG_02349 | conserved hypothetical protein                             | 1.06962 |
| CNAG_01713 | conserved hypothetical protein                             | 1.06954 |
| CNAG_05096 | histone deacetylase 3                                      | 1.06951 |
| CNAG_02095 | cyclin                                                     | 1.06905 |
| CNAG_07316 | alcohol dehydrogenase                                      | 1.06892 |

|            |                                                   |         |
|------------|---------------------------------------------------|---------|
| CNAG_02206 | predicted protein                                 | 1.06677 |
| CNAG_01919 | conserved hypothetical protein                    | 1.06646 |
| CNAG_04907 | conserved hypothetical protein                    | 1.06628 |
| CNAG_05628 | DUF300 domain-containing protein                  | 1.06601 |
| CNAG_02828 | conserved hypothetical protein                    | 1.06597 |
| CNAG_07491 | conserved hypothetical protein                    | 1.06441 |
| CNAG_05330 | trehalose transporter                             | 1.06397 |
| CNAG_02993 | imidazoleglycerol-phosphate dehydratase           | 1.06256 |
| CNAG_00152 | conserved hypothetical protein                    | 1.06200 |
| CNAG_06137 | predicted protein                                 | 1.06188 |
| CNAG_03923 | endonuclease                                      | 1.06167 |
| CNAG_00364 | O-sialoglycoprotein endopeptidase                 | 1.06059 |
| CNAG_00443 | conserved hypothetical protein                    | 1.06041 |
| CNAG_07621 | conserved hypothetical protein                    | 1.05966 |
| CNAG_06612 | conserved hypothetical protein                    | 1.05932 |
| CNAG_02540 | conserved hypothetical protein                    | 1.05885 |
| CNAG_03421 | conserved hypothetical protein                    | 1.05879 |
| CNAG_00581 | endopeptidase                                     | 1.05770 |
| CNAG_01131 | conserved hypothetical protein                    | 1.05763 |
| CNAG_03277 | inositol oxygenase                                | 1.05606 |
| CNAG_01722 | vacuolar protein sorting-associated protein vps13 | 1.05354 |
| CNAG_03460 | phosphoglycerate dehydrogenase                    | 1.05287 |
| CNAG_02505 | conserved hypothetical protein                    | 1.05185 |
| CNAG_02089 | conserved hypothetical protein                    | 1.04897 |
| CNAG_00595 | conserved hypothetical protein                    | 1.04876 |
| CNAG_05965 | conserved hypothetical protein                    | 1.04873 |
| CNAG_06014 | predicted protein                                 | 1.04768 |
| CNAG_01711 | glycerol-3-phosphate O-acyltransferase            | 1.04717 |
| CNAG_02192 | conserved hypothetical protein                    | 1.04451 |
| CNAG_04410 | endoplasmic reticulum protein                     | 1.04283 |
| CNAG_06704 | predicted protein                                 | 1.04087 |
| CNAG_03754 | short-chain dehydrogenase/reductase SDR           | 1.04054 |
| CNAG_06281 | predicted protein                                 | 1.04006 |
| CNAG_04610 | conserved hypothetical protein                    | 1.03980 |
| CNAG_01989 | conserved hypothetical protein                    | 1.03631 |
| CNAG_07575 | conserved hypothetical protein                    | 1.03528 |
| CNAG_02381 | conserved hypothetical protein                    | 1.03489 |
| CNAG_00156 | conserved hypothetical protein                    | 1.03333 |
| CNAG_04520 | D-aminoacylase                                    | 1.03291 |
| CNAG_04178 | conserved hypothetical protein                    | 1.03187 |
| CNAG_04874 | conserved hypothetical protein                    | 1.03162 |
| CNAG_06265 | high-affinity nicotinic acid transporter          | 1.02723 |
| CNAG_01472 | endoplasmic reticulum protein                     | 1.02699 |
| CNAG_05438 | conserved hypothetical protein                    | 1.02555 |
| CNAG_04059 | conserved hypothetical protein                    | 1.02451 |
| CNAG_06869 | HPP family protein                                | 1.02233 |

|            |                                           |         |
|------------|-------------------------------------------|---------|
| CNAG_02305 | conserved hypothetical protein            | 1.02192 |
| CNAG_01427 | acetyltransferase                         | 1.02190 |
| CNAG_05738 | hypothetical protein                      | 1.02150 |
| CNAG_03103 | ubiquitin-protein ligase                  | 1.02131 |
| CNAG_01910 | conserved hypothetical protein            | 1.02091 |
| CNAG_00015 | conserved hypothetical protein            | 1.02003 |
| CNAG_06866 | conserved hypothetical protein            | 1.01973 |
| CNAG_05468 | DNA-(apurinic or apyrimidinic site) lyase | 1.01973 |
| CNAG_07673 | predicted protein                         | 1.01944 |
| CNAG_03995 | predicted protein                         | 1.01900 |
| CNAG_03689 | zf-C3HC4 type zinc finger                 | 1.01897 |
| CNAG_01399 | conserved hypothetical protein            | 1.01889 |
| CNAG_06912 | conserved hypothetical protein            | 1.01870 |
| CNAG_06232 | TFC7                                      | 1.01867 |
| CNAG_05284 | conserved hypothetical protein            | 1.01640 |
| CNAG_06966 | conserved hypothetical protein            | 1.01594 |
| CNAG_00835 | conserved hypothetical protein            | 1.01584 |
| CNAG_03231 | predicted protein                         | 1.01568 |
| CNAG_02788 | conserved hypothetical protein            | 1.01505 |
| CNAG_07312 | conserved hypothetical protein            | 1.01476 |
| CNAG_01873 | conserved hypothetical protein            | 1.01471 |
| CNAG_06058 | conserved hypothetical protein            | 1.01415 |
| CNAG_06371 | hydrolase                                 | 1.01342 |
| CNAG_07463 | cysteine-type endopeptidase               | 1.01262 |
| CNAG_00264 | nuclease I                                | 1.01205 |
| CNAG_04159 | IBR domain-containing protein             | 1.01195 |
| CNAG_02228 | conserved hypothetical protein            | 1.01179 |
| CNAG_03061 | multiple drug resistance protein          | 1.01030 |
| CNAG_06538 | monocarboxylic acid transporter           | 1.01025 |
| CNAG_05564 | peroxisome assembly protein per8          | 1.00716 |
| CNAG_02347 | conserved hypothetical protein            | 1.00537 |
| CNAG_07913 | conserved hypothetical protein            | 1.00464 |
| CNAG_07339 | conserved hypothetical protein            | 1.00323 |
| CNAG_00031 | conserved hypothetical protein            | 1.00271 |
| CNAG_02996 | flavoprotein oxygenase                    | 1.00078 |
