# Supplementary material
Source: PubMed Central journal article supplement (PMC6299223)
Supplement: mbo006184232st3.pdf [file mbo006184232st3.pdf]

Table S3. Genome-wide expression changes between isolates of patients who died versus survived at 10 weeks.

| Locus      | Gene name                                      | Log2 (10 weeks died/survive) |
|------------|------------------------------------------------|------------------------------|
| CNAG_02692 | nitroreductase family protein                  | -2.20344                     |
| CNAG_01683 | monosaccharide transporter                     | -1.61185                     |
| CNAG_07347 | heat shock protein                             | -1.6085                      |
| CNAG_03061 | multiple drug resistance protein               | -1.58772                     |
| CNAG_02415 | annexin XIV                                    | -1.57801                     |
| CNAG_00730 | ATP-binding cassette transporter               | -1.50101                     |
| CNAG_04096 | racemase                                       | -1.46745                     |
| CNAG_06208 | heat shock protein                             | -1.45796                     |
| CNAG_07799 | ABC transporter                                | -1.44904                     |
| CNAG_00183 | alternative cyclin Pcl12                       | -1.41346                     |
| CNAG_00373 | glucan 1,3-beta-glucosidase                    | -1.38404                     |
| CNAG_05031 | succinyl-CoA:3-ketoacid-coenzyme A transferase | -1.35699                     |
| CNAG_06446 | mitochondrial splicing suppressor              | -1.33572                     |
| CNAG_02460 | coproporphyrinogen oxidase                     | -1.30966                     |
| CNAG_06063 | cytochrome c oxidase assembly protein cox15    | -1.28598                     |
| CNAG_01727 | Hsc70-4                                        | -1.27784                     |
| CNAG_01187 | ribosome biogenesis protein RPF2               | -1.26699                     |
| CNAG_03168 | sulfite reductase                              | -1.25725                     |
| CNAG_06489 | adenosine kinase                               | -1.25428                     |
| CNAG_00622 | acetylornithine transaminase                   | -1.16209                     |
| CNAG_05842 | cytochrome P450                                | -1.15178                     |
| CNAG_06552 | CAMK/CAMKL/AMPK protein kinase                 | -1.14381                     |
| CNAG_01390 | adenine phosphoribosyltransferase              | -1.12733                     |
| CNAG_03202 | adenylate cyclase                              | -1.12614                     |
| CNAG_06300 | glutamate-cysteine ligase                      | -1.02553                     |
| CNAG_06808 | pheromone receptor CPRalpha                    | 1.204901                     |
| CNAG_09007 | NADH dehydrogenase subunit 6                   | 1.31834                      |
| CNAG_06574 | antiphagocytic protein 1                       | 1.656054                     |
