# Supplementary material
Source: PubMed Central journal article supplement (PMC6299223)
Supplement: mbo006184232st4.pdf [file mbo006184232st4.pdf]

Table S4. List of genes suppressed by both *ECM15* and *CAC2* determined by genome-wide expression analysis

| Locus      | Gene name                                       | Log2<br>(H99/ <i>ecm15</i> Δ) | Log2<br>(H99/ <i>cac2</i> Δ) |
|------------|-------------------------------------------------|-------------------------------|------------------------------|
| CNAG_01683 | monosaccharide transporter                      | -1.99734                      | -1.2439                      |
| CNAG_00876 | ferric-chelate reductase                        | -1.93228                      | -1.59854                     |
| CNAG_05333 | conserved hypothetical protein                  | -1.50697                      | -1.25328                     |
| CNAG_06874 | HpCH/Hpal aldolase/citrate lyase family protein | -1.35819                      | -1.82138                     |
