# Supplementary material
Source: PubMed Central journal article supplement (PMC6299223)
Supplement: mbo006184232st5.pdf [file mbo006184232st5.pdf]

Table S5. Strains, primers, and probes used in this study.

Table S5A. Strains used in this study.

| strain name                                 | genotype                                  | strain No |
|---------------------------------------------|-------------------------------------------|-----------|
| H99                                         | H99 MAT $\alpha$                          | YP672     |
| <i>pka1</i> $\Delta$                        | <i>pka1::ura5</i>                         | YP561     |
| <i>vad1</i> $\Delta$                        | <i>vad1::ura5</i>                         | YP536     |
| <i>ecm15</i> $\Delta$                       | <i>ecm15::ura5</i>                        | YP573     |
| <i>cac2</i> $\Delta$                        | <i>cac2::nat</i>                          | YP584     |
| <i>stl1</i> $\Delta$                        | <i>stl1::nat</i>                          | YP620     |
| <i>pka1</i> $\Delta$ + <i>VAD1</i>          | <i>pka1::ura5 VAD1:hygB</i>               | YP619     |
| <i>vad1</i> $\Delta$ + <i>Ecm15:mCherry</i> | <i>vad1::ura5 ECM15:mCherry</i>           | YP635     |
| <i>ecm15</i> $\Delta$ + <i>ECM15</i>        | <i>ecm15::ura5 ECM15:hybB</i>             | YP612     |
| <i>ecm15</i> $\Delta$ + <i>VAD1</i>         | <i>ecm15::ura5 VAD1:hybB</i>              | YP611     |
| <i>ecm15</i> $\Delta$ + <i>CAC2</i>         | <i>cac2::ura5 CAC2:hybB</i>               | YP617     |
| <i>ecm15</i> $\Delta$ + <i>STL1</i>         | <i>ecm15::ura5 STL1:hygB</i>              | YP610     |
| <i>cac2</i> $\Delta$ + <i>CAC2</i>          | <i>cac2::nat CAC2:hygB</i>                | YP617     |
| <i>cac2</i> $\Delta$ + <i>ECM15</i>         | <i>cac2::nat ECM15:hygB</i>               | YP604     |
| <i>cac2</i> $\Delta$ + <i>STL1</i>          | <i>cac2::ura5 STL1:hybB</i>               | YP618     |
| <i>stl1</i> $\Delta$ + <i>STL1</i>          | <i>stl1::nat STL1:hygB</i>                | YP761     |
| H99+ <i>VAD1</i>                            | H99+ <i>ACT1p:VAD1</i>                    | YP547     |
| H99+ <i>ECM15</i>                           | H99+ <i>ECM15</i>                         | YP762     |
| H99+ <i>CAC2</i>                            | H99+ <i>CAC2</i>                          | YP763     |
| H99+ <i>STL1</i>                            | H99+ <i>STL1</i>                          | YP639     |
| <i>Ecm15:mCherry Cac2:GFP</i>               | <i>ecm15::ura5 ECM15:mCherry CAC2:GFP</i> | YP750     |
| <i>cac2</i> $\Delta$ + <i>Ecm15:mCherry</i> | <i>cac2::nat ECM15:mCherry</i>            | YP602     |
| <i>pka1</i> $\Delta$ + <i>Vad1-GFP</i>      | <i>pka1::ura5 VAD1:GFP</i>                | YP590     |
| H99+ <i>VAD1:GFP</i>                        | H99+ <i>VAD1:GFP</i>                      | YP578     |
| H99+ <i>CAC2:GFP</i>                        | H99+ <i>CAC2:GFP</i>                      | YP574     |
| H99+ <i>ECM15:mCherry</i>                   | H99+ <i>ECM15:mCherry</i>                 | YP603     |
| Sc <i>ecm15</i> $\Delta$ +Cn <i>ECM15</i>   | Sc <i>ecm15::ura5 Cn ECM15</i>            | YP744     |
| Sc <i>ecm15</i> $\Delta$ +EV                | Sc <i>ecm15::ura5 pH125</i>               | YP745     |
| Sc <i>cac2</i> $\Delta$ +Cn <i>CAC2</i>     | Sc <i>cac2::ura5 Cn CAC2</i>              | YP746     |
| Sc <i>cac2</i> $\Delta$ +EV                 | Sc <i>cac2::ura5 pH125</i>                | YP747     |
| Sc <i>ecm15</i> $\Delta$                    | Sc <i>ecm15::ura5</i>                     | YP738     |
| Sc <i>cac2</i> $\Delta$                     | Sc <i>cac2::ura5</i>                      | YP739     |
| KN99                                        | KN99 MATa 7286                            | YP564     |
| H99+EV                                      | H99+pORA                                  | YP516     |

Table S5B. Primers used in this study.

| Name                 | Sequence (5' to 3')                                   | Purpose             |
|----------------------|-------------------------------------------------------|---------------------|
| ECM15pro-NdeI-s      | GGA TACA TA TGTGTTGACTA TGGTCATGTCCG                  | Ecm15-mCherry       |
| ECM15-PstI-w o ter-a | ATA TACTGCA GTGCTTTGGA TGAGGACTCTT                    | Ecm15-mCherry       |
| ECM+1kb-RI-s         | atccggaattcGACTA TGGTCATGTCCGTGGG                     | ECM15 cmplementay   |
| ECM+1kb-RI-a         | ttccggaattcTATTGATGATGAAAGGCAATC                      | ECM15 cmplementay   |
| CAC+1kb-RI-s         | atccggaattcAGCTCCTCTACGTCCGACTTG                      | CAC2 cmplementay    |
| CAC+1kb-RI-a         | ttccggaattcCAGAGCTTATGGA GCAATGC                      | CAC2 cmplementay    |
| CWO-RFP-NdeI-s       | GGA TACA TA TGTGTTGACTA TGGTCATGTCCG                  | Ecm15-mCherry       |
| CWO-RFP-PstI-a       | A T A TACTGCA GTGCTTTGGA TGAGGACTCTT                  | Ecm15-mCherry       |
| CAC2-up-s            | AAGCTCCTCTACGTCCGACTTGCCCTTCACTTCTGAG                 | CAC2 knockout       |
| COM+NAT-s            | CCGCTGCTAGCGCGCCGTGACACGGAA GAGA TGTA GAAACTAGC       | CAC2 knockout       |
| COM+CAC2-up-a        | CACGGCGCGCCTAGCAGCGGATGTTGGGAGTGTATGGAAAGAG           | CAC2 knockout       |
| COM+CAC2-dn-s        | GTCA GCGGCCGCA TCCTTGCA GTTGA CGCA TTTGGGATCGGAGC     | CAC2 knockout       |
| COM+NAT-a            | GCA GGGATGCGGCCGTGACAGGATGTGAGCTGGAGAGCGGCG           | CAC2 knockout       |
| CAC2-dn-a            | GACTATA GCGCGTACGGTACGCTTCCGGGAGG                     | CAC2 knockout       |
| MST-up-s             | GGTGCA GAGGTCGGCA GCAATTA TCGA TTGTTGACGAG            | STL1 knockout       |
| COM+MST-up-a         | CACGGCGCGCCTAGCAGCGGATGTGAA GTTGAGATGCGATAGAC         | STL1 knockout       |
| COM+MST-dn-s         | GTCA GCGGCCGCA TCCTTGCA GGAAATAA TAA TGTA TAGAGATTTAC | STL1 knockout       |
| MST-dn-a             | CA TCTTTAGTCAAAGTCA TACATCCAGGCTCTGTTAG               | STL1 knockout       |
| ECM-RTPCR-s          | GGGTACCCTAGAA TTGCTAC                                 | qPCR                |
| ECM-RTPCR-a          | GCTTTGGATGAGGACTCTTTG                                 | qPCR                |
| CAC-RTPCR-s          | ATGGAAGGCTGCCACCGGC                                   | qPCR                |
| CAC-RTPCR-a          | TAAACGTGTTGACATGTA CCGC                               | qPCR                |
| MST-RT-s             | TTCAGTCTGTTGGCTATGACC                                 | qPCR                |
| MST-RT-a             | CGACGATGAACTGGACGAAAC                                 | qPCR                |
| ACT1850-s            | ACCATGTACAA TGGA TTGCC                                | qPCR-control        |
| ACT1910-a            | CGTATTCGCTCTTCGCGATC                                  | qPCR-control        |
| MST1500-Nde-Bgl-s    | aggaagatctcatatgGATCGTATTTATCCA TTGCCG                | STL1 promoter assay |
| MST1000-Nde-Bgl-s    | aggaagatctcatatgGAATCAGGGACGTTTCAGGG                  | STL1 promoter assay |
| MST500-Nde-Bgl-s     | aggaagatctcatatgGGTTACCGAGCCGAGCGGCAC                 | STL1 promoter assay |
| MST50-Nde-Bgl-s      | aggaagatctcatatgCAAGTCTAAAGGACATTCCTTC                | STL1 promoter assay |
| STL960s              | GACGATATGTCTATA TTTATG                                | ChIP                |
| STL860a              | CAATGACCGAGTCTGCCAAC                                  | ChIP                |
| STL-860s             | GTTGGCAGACTCGGTCA TTG                                 | ChIP                |
| STL-760a             | CATGCGACGGACAAAATCG                                   | ChIP                |
| STL-760s             | CGATTTTTGTCCGTCGCA TG                                 | ChIP                |
| STL-660a             | AAGGGTTCTGCCGATTCGG                                   | ChIP                |
| STL-660s             | TCGGCAGAACCTTTTTATG                                   | ChIP                |
| STL-560a             | GGCAAA TGTGCTGAGTGGAG                                 | ChIP                |
| STLORF2100s          | CTAAGCACCCCTCAGGATGAC                                 | ChIP                |
| STLORF2200a          | GTGGAGTGGACCA GCCTTC                                  | ChIP                |
| FRE7-700s            | TTGTTGATAGGGCTATGTTG                                  | ChIP                |
| FRE7-600a            | ACA TCCTACCATGAGATAAC                                 | ChIP                |
| FRE7-600s            | TGTA CTTTTAGCGTAAGTC                                  | ChIP                |
| FRE7-500a            | TTGTAGATTGCAGAAACTG                                   | ChIP                |
| FRE7-500s            | CTGCCATATTA TTGATTTAG                                 | ChIP                |
| FRE7-400a            | TGGTAGAAA CGTAAGGATGTG                                | ChIP                |
| ACT1-1850s           | GCCTCTTTGTCTACCTTCCAG                                 | ChIP-control        |
| ACT1-1950a           | GTGGACGATGAGGGACCG                                    | ChIP-control        |
| ECM15 OE-s           | AATTA GAATTCGTCCGACCA GCTCTACGCCATC                   | ECM15 OE            |
| ECM15 OE-a           | ATA TAGAATTCGTGCTTTGGATGAGGACTCTT                     | ECM15 OE            |
| CAC2 OE-s            | aaccggaattcaATGAGACCCAAAGTTCTTG                       | CAC2 OE             |
| CAC2 OE-a            | atgaattcggTTGCTCCGATCCCAAATGC                         | CAC2 OE             |

Table S5C. FISH probes used in this study.

| Sequence Name | Sequence              | Three Modification |
|---------------|-----------------------|--------------------|
| STL1-FISH_1   | gtgaagggccaccataagtaa | C3-Fluorescein     |
| STL1-FISH_2   | tccaacaatggcatagagca  | C3-Fluorescein     |
| STL1-FISH_3   | tagccaaacagactgaagcc  | C3-Fluorescein     |
| STL1-FISH_4   | tgataccagacatgagacct  | C3-Fluorescein     |
| STL1-FISH_5   | tggcaggaaattcggtgtg   | C3-Fluorescein     |
| STL1-FISH_6   | catgcacatcgttgacatca  | C3-Fluorescein     |
| STL1-FISH_7   | taacaggaggtcacagtacc  | C3-Fluorescein     |
| STL1-FISH_8   | gttcgccaagaataagggcg  | C3-Fluorescein     |
| STL1-FISH_9   | tcataataatggcgcccata  | C3-Fluorescein     |
| STL1-FISH_10  | aaggcgcacacagagatgat  | C3-Fluorescein     |
| STL1-FISH_11  | gatgaactggacgaaaccgc  | C3-Fluorescein     |
| STL1-FISH_12  | tacaccagtgatcacacgac  | C3-Fluorescein     |
| STL1-FISH_13  | caggaaggaatggtgcagt   | C3-Fluorescein     |
| STL1-FISH_14  | atcaggaaaccacggtgtg   | C3-Fluorescein     |
| STL1-FISH_15  | acagtaccaacagcaactgt  | C3-Fluorescein     |
| STL1-FISH_16  | accgaaatcgatccagtagg  | C3-Fluorescein     |
| STL1-FISH_17  | ccaagagacggaactgtca   | C3-Fluorescein     |
| STL1-FISH_18  | aggattgcaaggcaatggg   | C3-Fluorescein     |
| STL1-FISH_19  | ggaagaaccataaccacc    | C3-Fluorescein     |
| STL1-FISH_20  | caatcaaccaacgggtgac   | C3-Fluorescein     |
| STL1-FISH_21  | taaaccctcatgatcgtagc  | C3-Fluorescein     |
| STL1-FISH_22  | agagtcgagagcagcaatga  | C3-Fluorescein     |
| STL1-FISH_23  | gcaatagcgacaggatcatc  | C3-Fluorescein     |
| STL1-FISH_24  | cttgacatttgggtggcag   | C3-Fluorescein     |
| STL1-FISH_25  | tctcggaaagtgtgtttt    | C3-Fluorescein     |
| STL1-FISH_26  | ttgtgaaaagctcgtgg     | C3-Fluorescein     |
| STL1-FISH_27  | atgacagcattacaaccacc  | C3-Fluorescein     |
| STL1-FISH_28  | caagtgtggttcaagaccg   | C3-Fluorescein     |
| STL1-FISH_29  | gacgatagagagaacaccgc  | C3-Fluorescein     |
| STL1-FISH_30  | gaagaaggaggtgagggcaa  | C3-Fluorescein     |
| STL1-FISH_31  | ggaaaagcttcgacgacca   | C3-Fluorescein     |
| STL1-FISH_32  | agtgatgaacatggcagcag  | C3-Fluorescein     |
| STL1-FISH_33  | atcaccgggaagaagacatc  | C3-Fluorescein     |
| STL1-FISH_34  | gataaagaccgaaagcgcca  | C3-Fluorescein     |
| STL1-FISH_35  | gccaagtagcaccaaagaac  | C3-Fluorescein     |
| STL1-FISH_36  | agggtaaagccaaggagag   | C3-Fluorescein     |
| STL1-FISH_37  | ctaaccgcatagagttgag   | C3-Fluorescein     |
| STL1-FISH_38  | gtagaatatgcgttgctg    | C3-Fluorescein     |
| STL1-FISH_39  | gttgaaaagccagttgacca  | C3-Fluorescein     |
| STL1-FISH_40  | ttggcaaacctgcacgatg   | C3-Fluorescein     |
| STL1-FISH_41  | caggaaagtgaagcgccaa   | C3-Fluorescein     |
| STL1-FISH_42  | aaagttcgtccagtagtctc  | C3-Fluorescein     |
| STL1-FISH_43  | ggcggaagataacatcgagt  | C3-Fluorescein     |
| STL1-FISH_44  | acgacgctcggaagatgag   | C3-Fluorescein     |
| STL1-FISH_45  | gaaatcagtgagcttgggga  | C3-Fluorescein     |
| STL1-FISH_46  | ggattcataccgatcagtc   | C3-Fluorescein     |
| STL1-FISH_47  | aagggaagtgcaggagcac   | C3-Fluorescein     |
| STL1-FISH_48  | catcaggatagtagttgggg  | C3-Fluorescein     |
